# Supplementary material for: Genetic polymorphism of NFKB1 and NFKBIA genes and liver cancer risk: a nested case–control study in Shanghai, China
Source: PubMed Central journal article supplement — BMJ Open. 2014 Feb 27;4(2):e004427. doi: 10.1136/bmjopen-2013-004427 (PMC3939648; doi:10.1136/bmjopen-2013-004427), 2014-02-27
Supplement: bmjopen-2013-004427.draft_revisions.pdf [file bmjopen-2013-004427.draft_revisions.pdf]

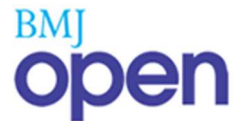

**Genetic polymorphism of NFKB1 and NFKBIA genes and liver cancer risk: a nested case-control study in Shanghai, China**

|                                 |                                                                                                                                                                                                                                                                                                                                                                                                                                                                                                                                                                                                     |
|---------------------------------|-----------------------------------------------------------------------------------------------------------------------------------------------------------------------------------------------------------------------------------------------------------------------------------------------------------------------------------------------------------------------------------------------------------------------------------------------------------------------------------------------------------------------------------------------------------------------------------------------------|
| Journal:                        | <i>BMJ Open</i>                                                                                                                                                                                                                                                                                                                                                                                                                                                                                                                                                                                     |
| Manuscript ID:                  | bmjopen-2013-004427                                                                                                                                                                                                                                                                                                                                                                                                                                                                                                                                                                                 |
| Article Type:                   | Research                                                                                                                                                                                                                                                                                                                                                                                                                                                                                                                                                                                            |
| Date Submitted by the Author:   | 07-Nov-2013                                                                                                                                                                                                                                                                                                                                                                                                                                                                                                                                                                                         |
| Complete List of Authors:       | Gao, Jing; Shanghai Cancer Institute, Xu, Hong-Li; Shanghai Cancer Institute, Gao, Shan; The First Affiliated Hospital of Zhengzhou University, Zhang, Wei; Shanghai Cancer Institute, Tan, Yu-Ting; Shanghai Cancer Institute, Rothman, Nat; National Cancer Institute, Purdue, Mark; National Cancer Institute, Gao, Yu-Tang; Shanghai Cancer Institute, Department of Epidemiology Zheng, Wei; Vanderbilt School of Medicine, Department of Medicine Shu, Xiao-Ou; Vanderbilt School of Medicine, Department of Medicine Xiang, Yong-bing; Shanghai Cancer Institute, Department of Epidemiology |
| <b>Primary Subject Heading</b>: | Epidemiology                                                                                                                                                                                                                                                                                                                                                                                                                                                                                                                                                                                        |
| Secondary Subject Heading:      | Oncology, Epidemiology, Gastroenterology and hepatology                                                                                                                                                                                                                                                                                                                                                                                                                                                                                                                                             |
| Keywords:                       | Epidemiology < ONCOLOGY, Hepatobiliary tumours < ONCOLOGY, Cancer genetics < GENETICS, EPIDEMIOLOGY                                                                                                                                                                                                                                                                                                                                                                                                                                                                                                 |
|                                 |                                                                                                                                                                                                                                                                                                                                                                                                                                                                                                                                                                                                     |

SCHOLARONE™  
Manuscripts

1  
2  
3 **Genetic polymorphism of *NFKB1* and *NFKBIA* genes and liver cancer risk: a**  
4 **nested case-control study in Shanghai, China**  
5  
6

7  
8 Jing Gao<sup>1,2</sup>, Hong-Li Xu<sup>2</sup>, Shan Gao<sup>3</sup>, Wei Zhang<sup>2</sup>, Yu-Ting Tan<sup>2</sup>, Nat Rothman<sup>4</sup>,  
9 Mark Purdue<sup>4</sup>, Yu-Tang Gao<sup>2</sup>, Wei Zheng<sup>5</sup>, Xiao-Ou Shu<sup>5</sup>, Yong-Bing Xiang<sup>1,2</sup>  
10

11  
12 **Affiliations:**  
13

- 14 1. State Key Laboratory of Oncogene and Related Genes, Shanghai Cancer Institute,  
15 Renji Hospital, Shanghai Jiaotong University School of Medicine, Shanghai, China.  
16 2. Department of Epidemiology, Shanghai Cancer Institute, Renji Hospital, Shanghai  
17 Jiaotong University School of Medicine, Shanghai, China.  
18 3. Department of Infection Management, The First Affiliated Hospital of Zhengzhou  
19 University, Zhengzhou, China.  
20 4. Division of Cancer Epidemiology and Genetics, National Cancer Institute,  
21 Rockville, USA.  
22 5. Division of Epidemiology, Department of Medicine, Vanderbilt Epidemiology  
23 Center, Vanderbilt-Ingram Cancer Center, Vanderbilt University School of Medicine,  
24 Nashville, USA.  
25  
26  
27  
28

29 **Corresponding author**

30 Prof. Y. B. Xiang,  
31 Shanghai Cancer Institute  
32 Renji Hospital  
33 Shanghai Jiaotong University School of Medicine  
34 No. 25, Lane 2200, Xie Tu Road  
35 Shanghai 200032  
36 P. R. China  
37 Telephone: 86-21-64437002  
38 Fax: 86-21-64046550  
39 E-mail: ybxiang@shsci.org  
40  
41  
42  
43

44 **Key words:** genetic polymorphisms, *NFKB1*, *NFKBIA*, primary liver cancer,  
45 susceptibility  
46  
47

48 **Word count: 2668 (Text)**  
49

50 **Tables: 5**

51 **Figures: 0**

52 **Supplemental tables: 0**  
53  
54  
55  
56  
57  
58  
59  
60

**ABSTRACT**

**Objectives:** Genetic variations of NF- $\kappa$ B signaling pathway were found to be associated with inflammatory diseases and several malignancies. However, little is known about NF- $\kappa$ B pathway gene polymorphisms and susceptibility of liver cancer. The aim of this study was to investigate whether genetic variants of *NFKB1* and *NFKBIA* were associated with risk of liver cancer in a Chinese population.

**Design:** The study was designed as a nested case-control study within two prospective cohorts (the Shanghai Women's Health Study, SWHS, 1996–2000 and the Shanghai Men's Health Study, SMHS, 2002–2006).

**Settings:** This population-based study was conducted in urban Shanghai, China.

**Participants:** A total of 218 incident liver cancer cases diagnosed through December 31, 2011 and 436 healthy controls matched by sex, age at baseline ( $\pm 2$  years) and date ( $\pm 30$  days) of sample collection were included in the study.

**Primary and secondary outcome measures:** Genetic polymorphisms of *NFKB1* and *NFKBIA* were determined by TaqMan SNP genotyping assay blindly. ORs and its 95% CIs were estimated by unconditional logistic regression model to measure the association between selected SNPs and the risk of liver cancer.

**Results:** After adjusted for potential confounding factors, rs28362491 ins/del or del/del genotypes were associated with higher risk of liver cancer with an adjusted OR of 1.50(95%CI: 1.02-2.49). rs230496 AG and GG genotypes were also noted with higher risk of liver cancer with an adjusted OR of 1.49 (95%CI: 1.01-2.21). Haplotype analysis indicated that carriers of the *NFKB1* GA and AA (rs230525-rs230530) haplotypes had higher risk of liver cancer under additive model. No association was observed between *NFKBIA* variants and risk of liver cancer.

**Conclusions:** Our results suggest that genetic variants of *NFKB1* influence liver cancer susceptibility in Chinese population, although replication in other studies is needed.

**Article summary-strengths and limitations of this study**

- This study was the first population-based study to evaluate the polymorphic variants of NF- $\kappa$ B and risk of liver cancer.
- Only incident cases from two prospective cohorts were included in the study which ruled out the possibility of recall and selection bias.
- The limitations of the study include relatively small sample size, unmeasured HBV infection, HCV infection and aflatoxin exposure. However, we did take into

1  
2  
3 consideration of the participants' history of hepatitis and liver cirrhosis, and the  
4 presents of HCV infection and aflatoxin are very low in the study population.  
5  
6  
7

## 8 INTRODUCTION

9  
10 Liver cancer is a common disorder worldwide which ranks the 5th and 7th most  
11 common cancer among men and women. It was estimated that more than 80% liver  
12 cancers occur in developing countries and about 54% occur in China<sup>1</sup>. Among the  
13 main risk factors for liver cancer, chronic infections of hepatitis B virus (HBV) and  
14 hepatitis C virus (HCV) are the most important in humans, accounting for more than  
15 70% of liver cancer cases worldwide<sup>2-4</sup>. Liver cirrhosis, heavy alcohol consumption,  
16 exposure to aflatoxin B1, and diabetes also account for part of liver cancer  
17 occurrence<sup>2-4</sup>.  
18  
19

20  
21  
22 Chronic inflammation has been widely accepted to play an important role in  
23 hepatocarcinogenesis. Most of the known risk factors of liver cancer such as HBV,  
24 HCV infection and alcohol drinking can cause persistent inflammatory reaction of the  
25 liver and promote cancer development<sup>5, 6</sup>. However, the molecular and cellular  
26 mechanisms linking inflammation and liver cancer remain unclear. Recent findings  
27 have suggested that NF- $\kappa$ B may play a crucial role in bridging the actions of growth  
28 factors and chronic inflammation to hepatic oncogenesis<sup>7-10</sup>.  
29  
30

31  
32  
33 NF- $\kappa$ B, a collection of dimeric transcription factors, was originally identified as  
34 a nuclear factor specific to B cells bound to the B site of the  $\kappa$ -light chain gene  
35 enhancer<sup>11</sup> and presents in all cell types<sup>12</sup>. It is a major transcription regulator of the  
36 immune response, cell adhesion, differentiation, proliferation, and apoptosis<sup>13</sup>. NF- $\kappa$ B  
37 dimers are formed by seven distinct proteins: NF- $\kappa$ B1 (p105 and p50), NF- $\kappa$ B2 (p100  
38 and p52), RelA (p65), RelB and c-Rel, of which NF- $\kappa$ B p50/RelA is the most  
39 common dimer form<sup>9</sup>. In the resting cell, most NF- $\kappa$ B dimers are inactivated in the  
40 cytoplasm by binding to specific inhibitors-I $\kappa$ B family, of which I $\kappa$ B $\alpha$  is the most  
41 common one. In the classical activation pathway, I $\kappa$ B is phosphorylated and  
42 degraded by I $\kappa$ B kinase complex, and then NF- $\kappa$ B dimers are released and  
43 translocated to the nucleus where they coordinate the transcriptional activation of  
44 target genes<sup>14</sup>. Several genetic variations of NF- $\kappa$ B signaling pathway have been  
45 reported to be associated with cancer risks such as breast<sup>15</sup>, prostate<sup>16</sup>, stomach<sup>17</sup>,  
46 colorectum<sup>18</sup> and mouth<sup>19</sup>. However, little is known about role of genetic  
47 polymorphisms NF- $\kappa$ B genes and susceptibility of liver cancer.  
48  
49  
50  
51  
52  
53  
54  
55  
56  
57  
58  
59  
60

1  
2  
3  
4  
5  
6  
7  
8  
9  
10  
11  
12  
13  
14  
15  
16  
17  
18  
19  
20  
21  
22  
23  
24  
25  
26  
27  
28  
29  
30  
31  
32  
33  
34  
35  
36  
37  
38  
39  
40  
41  
42  
43  
44  
45  
46  
47  
48  
49  
50  
51  
52  
53  
54  
55  
56  
57  
58  
59  
60

In a population based case-control study nested in two prospective cohorts of the Shanghai Women's and Men's Health Studies, we investigated the relationships between genetic variants of *NFKBI* and *NFKBIA*, two key genes involved in classic signaling pathway of NF- $\kappa$ B, and the risk of LIVER CANCER among Chinese men and women.

## MATERIAL AND METHODS

### Study population

Participants of this study came from the Shanghai Women's Health Study (SWHS) and Shanghai Men's Health Study (SMHS). The design and methods used in these two studies have been described in detail elsewhere<sup>20-23</sup>. Briefly, the SWHS enrolled 74,941 women aged 40-74 years between March 1, 1997 and May 31, 2000, with a response rate of 92.7%. SMHS enrolled 61,491 men aged 40-74 years without history of cancer at recruitment from April 1, 2002 to June 30, 2006, with a response rate of 74.1%. Both studies were approved by the relevant Institutional Review Boards for human research in China and the United States and a written informed consent was obtained from all participants.

In-person interview was conducted by trained interviewers using a structured questionnaire at baseline to obtain information on demographics, lifestyle, dietary habits, medical history and other characteristics. Anthropometric measurements, including current weight, height and circumferences of the waist and hips, were also measured. Of the eligible participants, 56,831 (75.8%) of the SWHS and 46,332 (75.3%) of the SMHS provided a 10-ml blood sample at baseline. The samples were drawn into an EDTA Vacutainer tube and then kept in a portable styrofoam box with ice packs (at approximately 0-4°C) and processed within 6 hours for long-term storage at -70°C. A bio-specimen collection form was completed for each participant at the time of sample procurement which included the date and time of collection, time of last meal, and date of last menstruation, intake of selected foods, smoking, as well as use of any medications over the previous 24 hours and during the previous week.

### Cohort follow-up and outcome ascertainment

Both cohorts were followed for occurrence of cancer and other chronic diseases by active in-person surveys conducted every 2-3 years as well as annual record linkage to the databases of the population-based Shanghai Cancer Registry, Shanghai Vital Statistics Registry, and Shanghai Resident Registry. For the SWHS, four rounds

1  
2  
3 of in-person follow-ups were completed and the response rates for the first  
4 (2000-2002), second (2002-2004), third (2004-2007), and fourth (2008-2011)  
5 follow-up surveys were 99.8%, 98.7%, 96.7%, and 92.0%, respectively. For the  
6 SMHS, two rounds of follow-up surveys have completed. The response rates for the  
7 first (2004-2008) and second (2008-2011) follow-up surveys were 97.6% and 93.6%,  
8 respectively. For cohort members who developed liver cancer during the follow-up,  
9 medical chart were reviewed by a panel of oncologists to verify the diagnosis. Liver  
10 cancer data through December 31, 2011 was used for the present study.

11  
12  
13  
14  
15  
16 Included in this nested case-control study are 218 incident liver cancer cases and  
17 436 matched controls who had donated blood sample. Liver cancer cases were  
18 defined as having an International Classification of Disease, Ninth Revision (ICD-9),  
19 codes of 155.0 (primary malignant neoplasms), 155.1(malignant neoplasms of the  
20 intrahepatic bile ducts), or 155.2 (unspecified malignant neoplasms of the liver)<sup>24</sup>.  
21 Two control subjects were randomly selected from the cohorts who donated a blood  
22 sample at baseline and matched to each case for sex, age at baseline ( $\pm 2$  years) and  
23 date ( $\pm 30$  days) of sample collection. All controls were free of any cancer at the time  
24 of cancer diagnosis for the corresponding case.

### 30 31 **Genotyping**

32 Single-nucleotide polymorphisms (SNPs) were selected based on both TagSNP  
33 and their putative functional significance. Tagging SNPs were selected by searching  
34 the Han Chinese data from the Hapmap project<sup>25</sup>. The following criteria were used to  
35 identify tagging SNPs: (i) SNPs located in the genes or within the 5-kb flanking  
36 region, (ii) a minor allele frequency  $\geq 0.05$ , and (iii) other unselected  
37 single-nucleotide polymorphisms could be captured by one of the tagging SNPs with  
38 a linkage disequilibrium of  $r^2 \geq 0.90$ . A total of 8 SNPs were selected for genotyping  
39 which were rs28362491, rs230530, rs230525, rs230496 for *NFKB1* and rs3138053,  
40 rs3138055, rs2273650, rs696 for *NFKB1A* (table 1). Genomic DNA was extracted  
41 from buffycoat using Promega DNA Extraction Kit according to the manufacturer's  
42 instructions (Promega Corporation, Madison, WI, USA). Genotyping were performed  
43 by the TaqMan assay, using the ABIPRISM 7900HT Sequence Detection System  
44 (Applied Biosystems, Foster City, CA, USA), in 384-wellformat, with dual  
45 fluorescent reporter probes VIC and FAM. The quality and potential misclassification  
46 of the genotyping results were assessed by evaluating 5% of duplicate DNA samples  
47 that were randomly selected from the whole samples. There replicates were 100%

concordant. All serum samples were tested blindly and were identified only by an unique identification number blinded with case-control status.

Table 1. Descriptions of Genetic Polymorphisms of the *NFKB1* and *NFKBIA* genes under investigation

| Gene          | Assay ID   | Sequence                                                         | Location     |
|---------------|------------|------------------------------------------------------------------|--------------|
| <i>NFKB1</i>  | rs28362491 | CTCCGTGCTGCCTGCGTTCCTCCGACC[-/ATTG]ATTGGGCC<br>CGGCAGGCGCTTCCTGG | 5'-near gene |
|               | rs230530   | TTTTTAGCACCAAACATCTTAATTT[A/G]CATTCAAATAAA<br>TGAGAACCACCAT      | intron       |
|               | rs230525   | TACGGGAAAAGTGATTCTTGTTTAC[A/G]GAGCCCTCTTT<br>CACAGTTTCATGTT      | intron       |
|               | rs230496   | TGTCTGGATTGCTTGAGACAGCCC[A/G]GTTTGCCCTG<br>ACCTAATTGTTTAT        | intron       |
| <i>NFKBIA</i> | rs3138053  | ATTCGTTTATGCTATCTGACCTACA[C/T]TGTGCTCCCGCA<br>GAAAAAGGATCGT      | 5'-near gene |
|               | rs3138055  | AATCAACGGGATGACAGAATGACAA[C/T]GGAGAGGTCT<br>CCAACCACAGGCCAA      | 3'-near gene |
|               | rs2273650  | AACAATACATTATGTACACCATTTA[C/T]AGGAGGGTAAC<br>ACAAACCTTGACAG      | 3'-UTR       |
|               | rs696      | CCTACCACAATAAGACGTTTTGGGC[C/T]AGGCAGTGTGC<br>AGTGTGGATATAAG      | 3'-UTR       |

### Statistical analysis

Subjects with both survey data and genotyping results were included in the final analysis. Means and percentages of selected characteristics for cases and controls were calculated. The distributions of selected characteristics were compared between cases and controls by either student's *t*-test (continuous variables) or  $\chi^2$  test (categorical variables). Odds ratio and its 95% confidence interval were estimated by unconditional logistic regression model to measure the association between selected SNPs and the risk of primary liver cancer. In the multivariable analysis, potential confounding factors were adjusted for, which include age (continuous variable); education level (four categories: elementary school or less, middle school, high school, and college or above); history of hepatitis (yes or no); family history of liver cancer (yes or no); and history of other chronic liver diseases or cirrhosis (yes or no). Statistical analyses were carried out using the SAS software package (version 9.2; SAS Institute, Cary, NC). Tests for trend were performed by entering categorical variables as continuous variables in the regression model. All P values were calculated by two-sided tests and were considered statistically significant if P was less than 0.05.

Hardy–Weinberg equilibrium and Linkage disequilibrium were assessed with HaploView version 4.0<sup>26</sup>. Associations between haplotypes and the risk of liver cancer

1  
2  
3  
4  
5  
6  
7  
8  
9  
10  
11  
12  
13  
14  
15  
16  
17  
18  
19  
20  
21  
22  
23  
24  
25  
26  
27  
28  
29  
30  
31  
32  
33  
34  
35  
36  
37  
38  
39  
40  
41  
42  
43  
44  
45  
46  
47  
48  
49  
50  
51  
52  
53  
54  
55  
56  
57  
58  
59  
60

were evaluated with HAPSTAT version 3.0 using the most common haplotype as the referent category, assuming an additive model<sup>27</sup>.

For peer review only



## RESULTS

Selected baseline characteristics of study participants were presented in table 2. The average ages of cases and control were 59.65 and 59.48. Compared with controls, liver cancer cases were more likely to have a lower education level, a history of hepatitis, a family history of liver cancer in first degree relatives, and history of chronic liver diseases or cirrhosis. Besides, male liver cancer cases were more probably to have lower body mass index, and be a non-regular exerciser compared to controls, although the difference were at borderline significance. Whereas in women, cases were more likely to have a history of type 2 diabetes than controls. No differences were observed in family income, smoking, drinking habits, waist to hip ratio, and family history of other cancers between the two groups.

The associations of *NFKB1* SNPs with liver cancer risk were summarized in table 3. The genotypes of rs28362491, rs230530 and rs230525 showed no deviation from Hardy-Weinberg equilibrium in controls except for rs230496. After adjusted for potential confounding factors, rs28362191 ins/del or del/del genotypes were associated with higher risk of liver cancer with an OR of 1.50(95%CI: 1.02-2.49). rs230496 AG and GG genotypes were also noted with higher risk of liver cancer with an adjusted OR of 1.49 (95%CI: 1.01-2.21). Carriers of rs230525 AG or GG genotypes had about 30% percent increased risk of liver cancer, but the risk was not insignificant. No association was found between rs230530 and liver cancer risk.

Table 4 presents the distribution of *NFKB1A* SNPs in cases and controls. The genotypes of rs3138055, rs696 and rs2273650 showed no deviation from Hardy-Weinberg equilibrium in controls but for rs3138053. Generally, all the four SNPs showed no relationship with liver cancer.

We further analyzed the haplotypes of these SNPs with risk of liver cancer (table 5). For *NFKB1* gene, two SNPs (rs230525, rs230530) demonstrated strong linkage disequilibrium ( $D' = 1.0$ ,  $r^2 = 0.58$ ). Compared to men carrying rs230525-rs230530 AG haplotype, those with GA or AA haplotypes were at increased risk of liver cancer with ORs of 1.46(95%CI: 1.05-2.03) and 1.81(95%CI: 1.15-2.86), respectively. For *NFKB1A*, rs3138053 and rs2273650 were in linkage disequilibrium ( $D' = 0.97$ ,  $r^2 = 0.31$ ) but none of the haplotypes was significantly associated with liver cancer.

Table 2. Distribution of selected characteristics in the study cases and controls<sup>†</sup>

| Characteristics                              | All subjects  |                  |        | Male          |                  |        | Female       |                  |        |
|----------------------------------------------|---------------|------------------|--------|---------------|------------------|--------|--------------|------------------|--------|
|                                              | Cases (N=218) | Controls (N=436) | P      | Cases (N=131) | Controls (N=393) | P      | Cases (N=87) | Controls (N=174) | P      |
| Age at interview, Mean±SD,                   | 59.65±9.55    | 59.48±9.53       | 0.835  | 60.05±9.93    | 59.86±9.95       | 0.858  | 59.06±8.98   | 58.93±8.86       | 0.914  |
| Education level (%)                          |               |                  |        |               |                  |        |              |                  |        |
| Elementary school or less                    | 63(29.17)     | 120(27.59)       |        | 18(13.95)     | 35(13.41)        |        | 45(51.72)    | 85(48.85)        |        |
| Middle school                                | 70(32.41)     | 151(34.71)       |        | 54(41.86)     | 104(39.85)       |        | 16(18.39)    | 47(27.01)        |        |
| High school                                  | 62(28.70)     | 92(21.15)        |        | 41(31.78)     | 61(23.37)        |        | 21(21.14)    | 31(17.82)        |        |
| College or above                             | 21(9.72)      | 72(16.55)        | 0.036  | 16(12.40)     | 61(23.37)        | 0.053  | 5(5.75)      | 11(6.32)         | 0.380  |
| Family income (%) <sup>†</sup>               |               |                  |        |               |                  |        |              |                  |        |
| Low                                          | 50(22.94)     | 95(21.84)        |        | 17(12.98)     | 37(14.12)        |        | 33(37.93)    | 58(33.53)        |        |
| Medium                                       | 112(51.38)    | 211(48.51)       |        | 76(58.02)     | 130(49.62)       |        | 36(41.38)    | 81(46.82)        |        |
| High                                         | 56(25.69)     | 129(29.66)       | 0.569  | 38(29.01)     | 95(36.25)        | 0.271  | 18(20.69)    | 34(19.65)        | 0.694  |
| Ever smoked (%)                              | 93(42.66)     | 174(39.91)       | 0.50   | 90(68.70)     | 163(62.21)       | 0.205  | 3(3.45)      | 11(6.32)         | 0.331  |
| Ever drank alcohol (%)                       | 45(20.64)     | 98(22.48)        | 0.593  | 42(32.06)     | 97(37.02)        | 0.332  | 3(3.45)      | 1(0.57)          | 0.109  |
| Body mass index ,kg/m <sup>2</sup> , Mean±SD | 23.80±3.64    | 24.16±3.33       | 0.209  | 23.16±3.25    | 23.77±2.89       | 0.06   | 24.76±4.00   | 24.74±3.83       | 0.97   |
| WHR, Mean±SD                                 | 0.87±0.07     | 0.87±0.07        | 0.995  | 0.90±0.06     | 0.90±0.06        | 0.379  | 0.82±0.05    | 0.83±0.06        | 0.231  |
| Regular physical activity (%)                | 95(43.58)     | 211(48.39)       | 0.245  | 49(37.40)     | 124(47.33)       | 0.062  | 46(52.87)    | 87(50.00)        | 0.662  |
| physical activity, MET-hours/week            | 82.16±47.67   | 83.57±43.43      | 0.696  | 66.86±40.33   | 68.00±34.61      | 0.78   | 105.1±48.84  | 107.0±44.90      | 0.752  |
| History of hepatitis (%)                     | 74(33.94)     | 25(5.73)         | <0.001 | 57(43.51)     | 16(6.11)         | <0.001 | 17(19.54)    | 9(5.17)          | <0.001 |
| Family history of cancer (%)                 | 69(31.65)     | 117(26.83)       | 0.198  | 41(31.30)     | 70(26.72)        | 0.342  | 28(32.18)    | 47(27.01)        | 0.384  |
| Family history of liver cancer (%)           | 28(12.84)     | 18(4.13)         | <0.001 | 20(15.27)     | 10(3.82)         | <0.001 | 8(9.20)      | 8(4.60)          | 0.144  |
| History of type 2 diabetes (%)               | 26(11.93)     | 36(8.26)         | 0.131  | 14(10.69)     | 25(9.54)         | 0.72   | 12(13.79)    | 11(6.32)         | 0.045  |
| History of chronic liver disease or          | 35(16.06)     | 11(2.52)         | <0.001 | 26(19.82)     | 10(3.82)         | <0.001 | 9(10.34)     | 1(0.57)          | <0.001 |

\* Missing data was excluded from the analysis

<sup>†</sup> Family income level (low income for <5000 yuan/year in the SWHS and <12 000 yuan/year in the SMHS; medium income for 5000 to <10 000 yuan/year in the SWHS and 12 000 to <24 000 yuan/year in the SMHS; and high income for >10 000 yuan/year in the SWHS and >24 000 yuan/year in the SMHS)

Table 3. *NFKB1* genetic polymorphisms with the risk of primary liver cancer

| SNPs               | Cases | Controls | P for $\chi^2$ | OR*   | 95%CI     | OR <sup>†</sup> | 95%CI     | OR <sup>‡</sup> | 95%CI     |
|--------------------|-------|----------|----------------|-------|-----------|-----------------|-----------|-----------------|-----------|
| rs28362491         |       |          |                |       |           |                 |           |                 |           |
| ins/ins            | 69    | 174      |                | 1.00  | -         | 1.00            | -         | 1.00            | -         |
| ins/del            | 102   | 166      |                | 1.55  | 1.07-2.25 | 1.55            | 1.07-2.25 | 1.64            | 1.09-2.49 |
| del/del            | 40    | 79       | 0.069          | 1.28  | 0.80-2.05 | 1.28            | 0.80-2.05 | 1.21            | 0.71-2.04 |
| <i>P for trend</i> |       |          |                | 0.148 |           | 0.148           |           | 0.246           |           |
| ins/del or del/del | 142   | 245      | 0.031          | 1.46  | 1.03-2.07 | 1.46            | 1.03-2.07 | 1.50            | 1.02-2.21 |
| rs230496           |       |          |                |       |           |                 |           |                 |           |
| AA                 | 65    | 167      |                | 1.00  | -         | 1.00            | -         | 1.00            | -         |
| AG                 | 101   | 173      |                | 1.50  | 1.03-2.19 | 1.50            | 1.03-2.19 | 1.64            | 1.08-2.50 |
| GG                 | 47    | 92       | 0.106          | 1.32  | 0.84-2.07 | 1.31            | 0.84-2.07 | 1.24            | 0.74-2.05 |
| <i>P for trend</i> |       |          |                | 0.152 |           | 0.152           |           | 0.259           |           |
| AG or GG           | 148   | 265      | 0.041          | 1.44  | 1.01-2.04 | 1.44            | 1.01-2.04 | 1.49            | 1.01-2.21 |
| rs230525           |       |          |                |       |           |                 |           |                 |           |
| AA                 | 80    | 189      |                | 1.00  | -         | 1.00            | -         | 1.00            | -         |
| AG                 | 102   | 180      |                | 1.34  | 0.94-1.92 | 1.35            | 0.94-1.92 | 1.42            | 0.95-2.11 |
| GG                 | 32    | 64       | 0.277          | 1.18  | 0.72-1.95 | 1.18            | 0.72-1.95 | 1.08            | 0.62-1.89 |
| <i>P for trend</i> |       |          |                | 0.268 |           | 0.258           |           | 0.402           |           |
| AG or GG           | 134   | 244      | 0.127          | 1.30  | 0.93-1.82 | 1.30            | 0.93-1.82 | 1.33            | 0.91-1.93 |
| rs230530           |       |          |                |       |           |                 |           |                 |           |
| AA                 | 64    | 116      |                | 1.00  | -         | 1.00            | -         | 1.00            | -         |
| AG                 | 99    | 181      |                | 0.99  | 0.67-1.46 | 0.99            | 0.67-1.47 | 1.03            | 0.67-1.59 |
| GG                 | 49    | 130      | 0.152          | 0.68  | 0.44-1.07 | 0.68            | 0.44-1.07 | 0.70            | 0.42-1.15 |
| <i>P for trend</i> |       |          |                | 0.1   |           | 0.1             |           | 0.169           |           |
| AG or GG           | 148   | 311      | 0.426          | 0.86  | 0.60-1.24 | 0.86            | 0.60-1.24 | 0.89            | 0.60-1.34 |

\*Adjusted for age

<sup>†</sup>Adjusted for age, sex.<sup>‡</sup>Adjusted for age, sex, education level, family history of liver cancer, history of hepatitis, and chronic liver diseases or cirrhosis.

Table 4. *NFKB1A* genetic polymorphisms with the risk of primary liver cancer

| SNPs               | Cases | Controls | P     | OR*   |           | OR <sup>†</sup> |           | OR <sup>‡</sup> |           |
|--------------------|-------|----------|-------|-------|-----------|-----------------|-----------|-----------------|-----------|
| rs3138053          |       |          |       |       |           |                 |           |                 |           |
| AA                 | 174   | 342      |       | 1.00  | -         | 1.00            | -         | 1.00            | -         |
| AG                 | 21    | 51       |       | 0.81  | 0.47-1.39 | 0.80            | 0.47-1.39 | 0.92            | 0.51-1.64 |
| GG                 | 19    | 40       | 0.736 | 0.93  | 0.53-1.66 | 0.94            | 0.53-1.68 | 0.98            | 0.51-1.89 |
| <i>P for trend</i> |       |          |       | 0.618 |           | 0.611           |           | 0.861           |           |
| AG or GG           | 40    | 91       | 0.487 | 0.86  | 0.57-1.31 | 0.86            | 0.57-1.31 | 0.94            | 0.60-1.49 |
| rs3138055          |       |          |       |       |           |                 |           |                 |           |
| CC                 | 63    | 129      |       | 1.00  | -         | 1.00            | -         | 1.00            | -         |
| CT                 | 109   | 220      |       | 1.02  | 0.70-1.49 | 1.02            | 0.70-1.49 | 1.17            | 0.76-1.80 |
| TT                 | 42    | 84       | 0.995 | 1.02  | 0.63-1.65 | 1.02            | 0.63-1.65 | 1.26            | 0.74-2.14 |
| <i>P for trend</i> |       |          |       | 0.923 |           | 0.923           |           | 0.379           |           |
| CT or TT           | 151   | 304      | 0.926 | 1.02  | 0.71-1.46 | 1.02            | 0.71-1.46 | 1.20            | 0.80-1.79 |
| rs696              |       |          |       |       |           |                 |           |                 |           |
| CC                 | 66    | 150      |       | 1.00  | -         | 1.00            | -         | 1.00            | -         |
| CT                 | 115   | 202      |       | 1.30  | 0.90-1.88 | 1.30            | 0.90-1.88 | 1.41            | 0.93-2.13 |
| TT                 | 33    | 78       | 0.268 | 0.96  | 0.58-1.58 | 0.96            | 0.58-1.58 | 1.12            | 0.64-1.94 |
| <i>P for trend</i> |       |          |       | 0.822 |           | 0.823           |           | 0.459           |           |
| CT or TT           | 148   | 280      | 0.304 | 1.20  | 0.85-1.71 | 1.20            | 0.85-1.71 | 1.33            | 0.89-1.97 |
| rs2273650          |       |          |       |       |           |                 |           |                 |           |
| CC                 | 108   | 331      |       | 1.00  | -         | 1.00            | -         | 1.00            | -         |
| CT                 | 85    | 176      |       | 0.99  | 0.70-1.40 | 0.99            | 0.70-1.40 | 0.88            | 0.60-1.30 |
| TT                 | 20    | 37       | 0.934 | 1.11  | 0.61-1.99 | 1.11            | 0.61-2.00 | 0.92            | 0.47-1.79 |
| <i>P for trend</i> |       |          |       | 0.831 |           | 0.830           |           | 0.596           |           |
| CT or TT           | 105   | 213      | 0.959 | 1.01  | 0.73-1.41 | 1.01            | 0.73-1.41 | 0.89            | 0.62-1.28 |

\*Adjusted for age

† Adjusted for age, sex.

‡ Adjusted for age, sex, education level, family history of liver cancer, history of hepatitis, and chronic liver diseases or cirrhosis.

Table 5. ORs and 95% CIs for liver cancer in relation to *NFKB1/NFKB1A* haplotypes

|                                     | All subjects* |          |                 | Female† |          |                 | Male† |          |                 |
|-------------------------------------|---------------|----------|-----------------|---------|----------|-----------------|-------|----------|-----------------|
|                                     | Cases         | Controls | OR              | Cases   | Controls | OR              | Cases | Controls | OR              |
|                                     | (%)           | (%)      |                 | (%)     | (%)      |                 | (%)   | (%)      |                 |
| <i>NFKB1</i> (rs230525-rs230530)    |               |          |                 | n=87    | n=174    |                 | n=129 | n=260    |                 |
| AG                                  | 46.74         | 51.85    | ref             | 52.70   | 49.13    | ref             | 42.69 | 53.53    | ref             |
| GA                                  | 38.79         | 35.57    | 1.21(0.94-1.56) | 36.05   | 36.71    | 0.92(0.62-1.36) | 40.55 | 34.88    | 1.46(1.05-2.03) |
| AA                                  | 14.47         | 12.58    | 1.28(0.89-1.82) | 11.25   | 14.16    | 0.74(0.41-1.33) | 16.76 | 11.59    | 1.81(1.15-2.86) |
| <i>NFKB1A</i> (rs3138055-rs2273650) |               |          |                 |         |          |                 |       |          |                 |
| TC                                  | 44.78         | 44.30    | ref             | 47.67   | 43.28    | ref             | 43.15 | 45.14    | ref             |
| CT                                  | 29.15         | 28.33    | 1.02(0.77-1.34) | 31.51   | 30.46    | 0.94(0.61-1.44) | 27.79 | 27.12    | 1.07(0.75-1.55) |
| CC                                  | 25.76         | 26.90    | 0.95(0.72-1.27) | 20.81   | 26.26    | 0.72(0.45-1.15) | 28.50 | 26.95    | 1.11(0.77-1.60) |

\* Adjusted for age and sex.

† Adjusted for age

## DISCUSSION

In this nested case-control study, we found that the variants of rs28362491 and rs230496 of *NFKB1* gene might be associated with risk of primary liver cancer. After adjusting for possible confounders, rs28362491 deletion allele and rs230496 AG or GG genotypes were found to increase the risk of liver cancer. In addition, haplotype analysis indicated that carriers of the *NFKB1* GA and AA (rs230525-rs230530) haplotypes had higher risk of liver cancer under additive model, although this association was only observed in man. These findings suggested that variants of NF- $\kappa$ B signaling pathway may play a role in liver cancer susceptibility.

*NFKB1* gene was mapped on chromosome 4q23-q24 and composed of 24 exons<sup>28</sup>. This gene encodes for two proteins, p105 is a none-DNA binding protein and is activated to p50, a DNA binding protein by proteasome-mediated degradation. Several genetic polymorphisms were defined in *NFKB1* and researches have been focused on a common polymorphism of -94 del/ins (rs28362491) in the promoter region. Recent studies showed that genetic polymorphism of rs28362491 was associated with a number of cancer risks including sporadic breast cancer<sup>15</sup>, prostate cancer<sup>16</sup>, gastric cancer<sup>17</sup>, colorectal cancer<sup>18</sup>, and oral cancer<sup>19</sup>, but little is known about its relationship with liver cancer. Cao and his colleagues conducted a case-control study of 202 HCC cases of HBV carrier and 404 healthy controls without HBV infection. Results showed that after adjusting for age and gender, -94 ins/del and ins/ins genotypes might increase the risk of HCC, with ORs of 1.60 (95%CI:1.01-2.53) and 3.01 (95%CI:1.87-4.85), respectively<sup>29</sup>. A report from Taiwan also found ins allele more prevalent in HCC patients (OR=2.23,95%CI:1.32-3.77)<sup>30</sup>. In our study, we found that ins/del and del/del genotypes were more prevalent in liver cancer cases than controls. It was observed that the association of rs28362491 polymorphism with cancer susceptibility varied with cancer site and study populations. Ins allele was reported to increase the risk of oral cancer<sup>31</sup>, melanoma<sup>32</sup>, prostate cancer<sup>16</sup>, gastric cancer<sup>17</sup>, nasopharyngeal carcinoma<sup>33</sup> and cervical cancer<sup>34</sup>. Two studies in European found del allele might increase the risk of colorectal cancer<sup>35, 36</sup>, while in Chinese population, none or even reverse association were obtained<sup>35, 37</sup>. The difference of polymorphisms may probably result from interactions or combined effects with none genetic risk factors. Well-designed studies with larger sample size are needed to validate these findings.

To our knowledge, this is the first report on the variants of rs230496, rs230525 and rs230530 with liver cancer susceptibility. A study in European American descent found

1  
2  
3  
4  
5  
6  
7  
8  
9  
10  
rs230530 polymorphism associated with alcohol dependence, and the evidence came primarily from those individuals who met criteria for alcoholism earlier<sup>38</sup>. As alcohol is one of the major risk factors of liver cancer, rs230530 might play a role in alcohol associated liver cancer. Unfortunately, subject to the limitation of relatively small samplesize, we were not able to explore this issue.

11  
12  
13  
14  
15  
16  
17  
18  
19  
20  
21  
22  
23  
24  
25  
26  
27  
28  
29  
30  
*NFKBIA* gene, which encodes I $\kappa$ B $\alpha$ , the inhibitor of *NFKBI*, was mapped to 14q13 with six exons spanning approximately 3.5kb<sup>39</sup>. As a major component of I $\kappa$ B family, the dysfunction or down regulation of I $\kappa$ B $\alpha$  will lead to over activation of NF- $\kappa$ B. Epidemiological studies on *NFKBIA* were relatively rare. A 2758G/A polymorphysim (rs696) in 3' untranstated region might regulate the expression of I $\kappa$ B $\alpha$  and thus affect the activation of NF- $\kappa$ B. Sun et al. found the frequency of AG genotype was increased in Chinese patients  $\geq 50$  years of age (OR=3.06, 95% CI:1.55-6.02) with colonrectal cancer<sup>40</sup>. Another study on breast cancer fail to obtain a significant association<sup>15</sup>. There was no previous report on rs696 and risk of liver cancer.

31  
32  
33  
34  
35  
36  
37  
38  
39  
40  
41  
42  
43  
44  
45  
46  
47  
48  
49  
50  
51  
52  
53  
54  
55  
56  
57  
58  
59  
60  
Of the four SNPs of *NFKBIA* gene evaluated, we did not observed an significant association. In previous studies, rs3138053 variant was found to be associated with hepatocellular carcinoma in a Chinese mainland population<sup>29</sup> but not Taiwanese<sup>30</sup>.

There are several strengths of our study. This study was based on two well-designed prospective cohort studies. To the best of our knowledge, it was the first population based study to evaluate the polymorphic variants of NF- $\kappa$ B and risk of liver cancer. All study participants were ethnic Chinese and residents of Shanghai with similar genetic background, which minimized the potential confounding of ethnics. Only incident cases were included which ruled out the possibility of recall and selection bias. Liver cancer cases were carefully verified with multiple approaches which minimized the disease misclassification. Also, we controlled potential confounding variables in the analysis. The limitations of our study should also be noted. Firstly, we focused on only two genes involved in canonical pathway of NF- $\kappa$ B, other regulatory genes in NF- $\kappa$ B signaling pathway may also contribute to the pathogenesis of liver cancer. Secondly, we did not test for HBV infection, HCV infection or aflatoxin exposure, so we cannot rule out the possible confounding although the presents of HCV infection and aflatoxin are very low in the study population<sup>41</sup>, but we did take into consideration of the participants' history of hepatitis and liver cirrhosis. Finally, due to the relatively small sample size, the frequencies of some homozygous variants were low in subgroups therefore reduced the statistical power and limited us from evaluating the

1  
2  
3 joint effects in stratified analysis. Replication in other studies is needed.  
4

5 In summary, in this nested case-control study, we provided additional evidence for  
6 a role of NF- $\kappa$ B SNPs and haplotypes in the etiology of liver cancer. Studies in larger,  
7 varied populations are warranted to confirm these findings. Furthermore, functional  
8 studies are required in order to explore the underlying mechanisms.  
9  
10

11  
12  
13 **Acknowledgements** We would like to thank the participants of the Shanghai Men's  
14 Health Study and the Shanghai Women's Health Study for the invaluable contribution to  
15 this work.  
16  
17

18  
19  
20 **Contributors** YBX obtained the funding, developed the research design, drafted the  
21 manuscript, interpreted the results, and also had primary responsibility for the final  
22 content; W Zheng and XOS designed, directed and obtained funding for the parent  
23 cohorts, and contributed to the revisions and interpretation of the results; JG obtained  
24 part of funding, drafted the manuscript, analyzed the data and interpreted the results; JG  
25 and HLX conducted experiments; All authors critically reviewed and approval  
26 manuscript.  
27  
28  
29  
30  
31

32  
33 **Funding** This work was supported by the funds of State Key Project Specialized for  
34 Infectious Diseases of China [No.2008ZX10002-015, No.2012ZX10002008-002 to YB  
35 Xiang]. Part of JG's effort on the study has been supported by research project of  
36 Shanghai Municipal Health Bureau [No.2008208]. The parent cohorts were supported  
37 by the grants (R37 CA070867 to W Zheng and R01 CA82729 to XO Shu) from the US  
38 National Institutes of Health.  
39  
40  
41  
42

43  
44 **Competing interests** None. The funding sponsor had no role in the study design, data  
45 collection, statistical analysis and result interpretation, as well as in the writing of the  
46 report and the decision to submit for publication. The corresponding author had full  
47 access to all data in the study and final responsibility for the decision to submit for  
48 publication.  
49  
50  
51  
52

53  
54  
55 **Study approval** Institutional review board.

56  
57 **Ethics approval** Vanderbilt University IRB and Shanghai Cancer Institute IRB.  
58  
59  
60



1  
2  
3  
4 **Provenance and peer review** Not commissioned; externally peer reviewed.  
5  
6

7 **Data sharing statement** No additional data are available.  
8  
9

## 10 **References:**

- 11 1. Ferlay J, Shin HR, Bray F, *et al.* GLOBOCAN 2008 v2.0, Cancer Incidence and Mortality  
12 Worldwide: IARC CancerBase No. 10 [Internet]. Lyon, France: International Agency for Research  
13 on Cancer, 2010. Cited 28 Sep 2013. Available from URL: <http://globocan.iarc.fr>.
- 14 2. Gao J, Xie L, Yang WS, *et al.* Risk factors of hepatocellular carcinoma-current status and  
15 perspectives. *Asian Pac J Cancer Prev* 2012; 13: 743-52.
- 16 3. Schottenfeld D, Fraumeni JF. Cancer epidemiology and prevention. 3rd ed. Oxford: Oxford  
17 University Press, 2006.
- 18 4. Boyle P, Levin B. World cancer report 2008. Lyon: International Agency for Research on Cancer,  
19 2008.
- 20 5. Seitz HK, Stickel F. Molecular mechanisms of alcohol-mediated carcinogenesis. *Nat Rev Cancer*  
21 2007; 7: 599-612.
- 22 6. Coussens LM, Werb Z. Inflammation and cancer. *Nature* 2002; 420: 860-7.
- 23 7. Arsura M, Cavin LG. Nuclear factor-kappaB and liver carcinogenesis. *Cancer Lett* 2005; 229:  
24 157-69.
- 25 8. Pikarsky E, Porat RM, Stein I, *et al.* NF-kappaB functions as a tumour promoter in  
26 inflammation-associated cancer. *Nature* 2004; 431: 461-6.
- 27 9. He G, Karin M. NF-kappaB and STAT3 - key players in liver inflammation and cancer. *Cell Res*  
28 2011; 21: 159-68.
- 29 10. Berasain C, Castillo J, Perugorria MJ, *et al.* Inflammation and liver cancer: new molecular links.  
30 *Ann NY Acad Sci* 2009; 1155: 206-21.
- 31 11. Sen R, Baltimore D. Multiple nuclear factors interact with the immunoglobulin enhancer  
32 sequences. *Cell* 1986; 46: 705-16.
- 33 12. Barnes PJ, Karin M. Nuclear factor-kappaB: a pivotal transcription factor in chronic  
34 inflammatory diseases. *N Engl J Med* 1997; 336: 1066-71.
- 35 13. Baldwin AJ. Series introduction: the transcription factor NF-kappaB and human disease. *J Clin*  
36 *Invest* 2001; 107: 3-6.
- 37 14. Karin M. Nuclear factor-kappaB in cancer development and progression. *Nature* 2006; 441:  
38 431-6.
- 39 15. Curran JE, Weinstein SR, Griffiths LR. Polymorphic variants of NFKB1 and its inhibitory  
40 protein NFKBIA, and their involvement in sporadic breast cancer. *Cancer Lett* 2002; 188: 103-7.
- 41 16. Zhang P, Wei Q, Li X, *et al.* A functional insertion/deletion polymorphism in the promoter region  
42 of the NFKB1 gene increases susceptibility for prostate cancer. *Cancer Genet Cytogenet* 2009; 191:  
43 73-7.
- 44 17. Lo SS, Chen JH, Wu CW, *et al.* Functional polymorphism of NFKB1 promoter may correlate to  
45  
46  
47  
48  
49  
50  
51  
52  
53  
54  
55  
56  
57  
58  
59  
60

- 1  
2  
3 the susceptibility of gastric cancer in aged patients. *Surgery* 2009; 145: 280-5.
- 4 18. Yu Y, Liu H, Jin M, *et al.* The joint association of REST and NFKB1 polymorphisms on the risk  
5 of colorectal cancer. *Ann Hum Genet* 2012; 76: 269-76.
- 6 19. Lin CW, Hsieh YS, Hsin CH, *et al.* Effects of NFKB1 and NFKBIA gene polymorphisms on  
7 susceptibility to environmental factors and the clinicopathologic development of oral cancer. *PLoS*  
8 *One* 2012; 7: e35078.
- 9 20. Shu XO, Yang G, Jin F, *et al.* Validity and reproducibility of the food frequency questionnaire  
10 used in the Shanghai Women's Health Study. *Eur J Clin Nutr* 2004; 58: 17-23.
- 11 21. Zheng W, Chow WH, Yang G, *et al.* The Shanghai Women's Health Study: rationale, study design,  
12 and baseline characteristics. *Am J Epidemiol* 2005; 162: 1123-31.
- 13 22. Villegas R, Yang G, Liu D, *et al.* Validity and reproducibility of the food-frequency questionnaire  
14 used in the Shanghai men's health study. *Br J Nutr* 2007; 97: 993-1000.
- 15 23. Cai H, Zheng W, Xiang YB, *et al.* Dietary patterns and their correlates among middle-aged and  
16 elderly Chinese men: a report from the Shanghai Men's Health Study. *Br J Nutr* 2007; 98: 1006-13.
- 17 24. World Health Organization. International Classification of Diseases, ninth revision (ICD-9).  
18 Geneva, Switzerland: World Health Organization, 1977.
- 19 25. de Bakker PI, McVean G, Sabeti PC, *et al.* A high-resolution HLA and SNP haplotype map for  
20 disease association studies in the extended human MHC. *Nat Genet* 2006; 38: 1166-72.
- 21 26. Barrett JC, Fry B, Maller J, *et al.* Haploview: analysis and visualization of LD and haplotype  
22 maps. *Bioinformatics* 2005; 21: 263-5.
- 23 27. Lin DY, Zeng D, Millikan R. Maximum likelihood estimation of haplotype effects and  
24 haplotype-environment interactions in association studies. *Genet Epidemiol* 2005; 29: 299-312.
- 25 28. Mathew S, Murty VV, Dalla-Favera R, *et al.* Chromosomal localization of genes encoding the  
26 transcription factors, c-rel, NF-kappa Bp50, NF-kappa Bp65, and lyt-10 by fluorescence in situ  
27 hybridization. *Oncogene* 1993; 8: 191-3.
- 28 29. He Y, Zhang H, Yin J, *et al.* IkappaBalpha gene promoter polymorphisms are associated with  
29 hepatocarcinogenesis in patients infected with hepatitis B virus genotype C. *Carcinogenesis* 2009;  
30 30: 1916-22.
- 31 30. Cheng CW, Su JL, Lin CW, *et al.* Effects of NFKB1 and NFKBIA gene polymorphisms on  
32 hepatocellular carcinoma susceptibility and clinicopathological features. *PLoS One* 2013; 8: e56130.
- 33 31. Lin SC, Liu CJ, Yeh WI, *et al.* Functional polymorphism in NFKB1 promoter is related to the  
34 risks of oral squamous cell carcinoma occurring on older male areca (betel) chewers. *Cancer Lett*  
35 2006; 243: 47-54.
- 36 32. Bu H, Rosdahl I, Sun XF, *et al.* Importance of polymorphisms in NF-kappaB1 and  
37 NF-kappaB1alpha genes for melanoma risk, clinicopathological features and tumor progression in  
38 Swedish melanoma patients. *J Cancer Res Clin Oncol* 2007; 133: 859-66.
- 39 33. Zhou B, Rao L, Li Y, *et al.* A functional insertion/deletion polymorphism in the promoter region  
40 of NFKB1 gene increases susceptibility for nasopharyngeal carcinoma. *Cancer Lett* 2009; 275: 72-6.
- 41 34. Zhou B, Qie M, Wang Y, *et al.* Relationship between NFKB1 -94 insertion/deletion ATTG  
42 polymorphism and susceptibility of cervical squamous cell carcinoma risk. *Ann Oncol* 2010; 21:  
43 506-11.
- 44  
45  
46  
47  
48  
49  
50  
51  
52  
53  
54  
55  
56  
57  
58  
59  
60

- 1  
2  
3 35. Lewander A, Butchi AK, Gao J, *et al.* Polymorphism in the promoter region of the NFKB1 gene  
4 increases the risk of sporadic colorectal cancer in Swedish but not in Chinese populations. *Scand J*  
5 *Gastroenterol* 2007; 42: 1332-8.  
6  
7 36. Andersen V, Christensen J, Overvad K, *et al.* Polymorphisms in NFkB, PXR, LXR and risk of  
8 colorectal cancer in a prospective study of Danes. *Bmc Cancer* 2010; 10: 484.  
9  
10 37. Song S, Chen D, Lu J, *et al.* NFkappaB1 and NFkappaBIA polymorphisms are associated with  
11 increased risk for sporadic colorectal cancer in a southern Chinese population. *PLoS One* 2011; 6:  
12 e21726.  
13  
14 38. Edenberg HJ, Xuei X, Wetherill LF, *et al.* Association of NFKB1, which encodes a subunit of the  
15 transcription factor NF-kappaB, with alcohol dependence. *Hum Mol Genet* 2008; 17: 963-70.  
16  
17 39. Le Beau MM, Ito C, Cogswell P, *et al.* Chromosomal localization of the genes encoding the  
18 p50/p105 subunits of NF-kappa B (NFKB2) and the I kappa B/MAD-3 (NFKB1) inhibitor of  
19 NF-kappa B to 4q24 and 14q13, respectively. *Genomics* 1992; 14: 529-31.  
20  
21 40. Gao J, Pfeifer D, He LJ, *et al.* Association of NFKBIA polymorphism with colorectal cancer risk  
22 and prognosis in Swedish and Chinese populations. *Scand J Gastroenterol.* 2007; 42: 345-50.  
23  
24 41. Yuan JM, Ross RK, Stanczyk FZ, *et al.* A cohort study of serum testosterone and hepatocellular  
25 carcinoma in Shanghai, China. *Int J Cancer* 1995; 63: 491-3.  
26  
27  
28  
29  
30  
31  
32  
33  
34  
35  
36  
37  
38  
39  
40  
41  
42  
43  
44  
45  
46  
47  
48  
49  
50  
51  
52  
53  
54  
55  
56  
57  
58  
59  
60

STROBE Statement—Checklist of items that should be included in reports of *cohort studies*

|                              | Item No | Recommendation                                                                                                                                                                                    | Reported on page # |
|------------------------------|---------|---------------------------------------------------------------------------------------------------------------------------------------------------------------------------------------------------|--------------------|
| Title and abstract           | 1       | (a) Indicate the study's design with a commonly used term in the title or the abstract                                                                                                            | 1-3                |
|                              |         | (b) Provide in the abstract an informative and balanced summary of what was done and what was found                                                                                               | 2, 3               |
| <b>Introduction</b>          |         |                                                                                                                                                                                                   |                    |
| Background/rationale         | 2       | Explain the scientific background and rationale for the investigation being reported                                                                                                              | 3                  |
| Objectives                   | 3       | State specific objectives, including any prespecified hypotheses                                                                                                                                  | 4                  |
| <b>Methods</b>               |         |                                                                                                                                                                                                   |                    |
| Study design                 | 4       | Present key elements of study design early in the paper                                                                                                                                           | 4, 5               |
| Setting                      | 5       | Describe the setting, locations, and relevant dates, including periods of recruitment, exposure, follow-up, and data collection                                                                   | 4, 5               |
| Participants                 | 6       | (a) Give the eligibility criteria, and the sources and methods of selection of participants. Describe methods of follow-up                                                                        | 4, 5               |
|                              |         | (b) For matched studies, give matching criteria and number of exposed and unexposed                                                                                                               | 5                  |
| Variables                    | 7       | Clearly define all outcomes, exposures, predictors, potential confounders, and effect modifiers. Give diagnostic criteria, if applicable                                                          | 4-6                |
| Data sources/<br>measurement | 8*      | For each variable of interest, give sources of data and details of methods of assessment (measurement). Describe comparability of assessment methods if there is more than one group              | 4-6                |
| Bias                         | 9       | Describe any efforts to address potential sources of bias                                                                                                                                         | 4-6                |
| Study size                   | 10      | Explain how the study size was arrived at                                                                                                                                                         | 5                  |
| Quantitative variables       | 11      | Explain how quantitative variables were handled in the analyses. If applicable, describe which groupings were chosen and why                                                                      | 6                  |
| Statistical methods          | 12      | (a) Describe all statistical methods, including those used to control for confounding                                                                                                             | 6                  |
|                              |         | (b) Describe any methods used to examine subgroups and interactions                                                                                                                               | N/A                |
|                              |         | (c) Explain how missing data were addressed                                                                                                                                                       | 9                  |
|                              |         | (d) If applicable, explain how loss to follow-up was addressed                                                                                                                                    | 4-5                |
|                              |         | (e) Describe any sensitivity analyses                                                                                                                                                             | N/A                |
| <b>Results</b>               |         |                                                                                                                                                                                                   |                    |
| Participants                 | 13*     | (a) Report numbers of individuals at each stage of study—eg numbers potentially eligible, examined for eligibility, confirmed eligible, included in the study, completing follow-up, and analysed | 5, 9               |
|                              |         | (b) Give reasons for non-participation at each stage                                                                                                                                              | 4-5                |
|                              |         | (c) Consider use of a flow diagram                                                                                                                                                                | N/A                |
| Descriptive data             | 14*     | (a) Give characteristics of study participants (eg demographic, clinical, social) and information on exposures and potential confounders                                                          | 8, 9               |
|                              |         | (b) Indicate number of participants with missing data for each variable of interest                                                                                                               | 9-12               |
|                              |         | (c) Summarise follow-up time (eg, average and total amount)                                                                                                                                       | 4-5                |
| Outcome data                 | 15*     | Report numbers of outcome events or summary measures over time                                                                                                                                    | 5                  |

|                                                                                                                                                                |                          |    |                                                                                                                                                                                                              |           |
|----------------------------------------------------------------------------------------------------------------------------------------------------------------|--------------------------|----|--------------------------------------------------------------------------------------------------------------------------------------------------------------------------------------------------------------|-----------|
| 1<br>2<br>3<br>4<br>5<br>6<br>7<br>8<br>9<br>10                                                                                                                | Main results             | 16 | (a) Give unadjusted estimates and, if applicable, confounder-adjusted estimates and their precision (eg, 95% confidence interval). Make clear which confounders were adjusted for and why they were included | 6,7, 9-12 |
| 11<br>12<br>13                                                                                                                                                 |                          |    | (b) Report category boundaries when continuous variables were categorized                                                                                                                                    | 9         |
| 14<br>15<br>16<br>17<br>18<br>19                                                                                                                               |                          |    | (c) If relevant, consider translating estimates of relative risk into absolute risk for a meaningful time period                                                                                             | N/A       |
| 20<br>21<br>22<br>23<br>24                                                                                                                                     | Other analyses           | 17 | Report other analyses done—eg analyses of subgroups and interactions, and sensitivity analyses                                                                                                               | 12        |
| 25                                                                                                                                                             | <b>Discussion</b>        |    |                                                                                                                                                                                                              |           |
| 26<br>27<br>28<br>29                                                                                                                                           | Key results              | 18 | Summarise key results with reference to study objectives                                                                                                                                                     | 13-15     |
| 30<br>31<br>32<br>33                                                                                                                                           | Limitations              | 19 | Discuss limitations of the study, taking into account sources of potential bias or imprecision. Discuss both direction and magnitude of any potential bias                                                   | 14-15     |
| 34<br>35<br>36<br>37<br>38<br>39<br>40<br>41<br>42<br>43<br>44<br>45<br>46<br>47<br>48<br>49<br>50<br>51<br>52<br>53<br>54<br>55<br>56<br>57<br>58<br>59<br>60 | Interpretation           | 20 | Give a cautious overall interpretation of results considering objectives, limitations, multiplicity of analyses, results from similar studies, and other relevant evidence                                   | 15        |
|                                                                                                                                                                | Generalisability         | 21 | Discuss the generalisability (external validity) of the study results                                                                                                                                        | 13, 14    |
|                                                                                                                                                                | <b>Other information</b> |    |                                                                                                                                                                                                              |           |
|                                                                                                                                                                | Funding                  | 22 | Give the source of funding and the role of the funders for the present study and, if applicable, for the original study on which the present article is based                                                | 15        |

\*Give information separately for cases and controls in case-control studies and, if applicable, for exposed and unexposed groups in cohort and cross-sectional studies.

**Note:** An Explanation and Elaboration article discusses each checklist item and gives methodological background and published examples of transparent reporting. The STROBE checklist is best used in conjunction with this article (freely available on the Web sites of PLoS Medicine at <http://www.plosmedicine.org/>, Annals of Internal Medicine at <http://www.annals.org/>, and Epidemiology at <http://www.epidem.com/>). Information on the STROBE Initiative is available at [www.strobe-statement.org](http://www.strobe-statement.org).



**Genetic polymorphism of NFKB1 and NFKBIA genes and liver cancer risk: a nested case-control study in Shanghai, China**

|                                 |                                                                                                                                                                                                                                                                                                                                                                                                                                                                                                                                                                                                     |
|---------------------------------|-----------------------------------------------------------------------------------------------------------------------------------------------------------------------------------------------------------------------------------------------------------------------------------------------------------------------------------------------------------------------------------------------------------------------------------------------------------------------------------------------------------------------------------------------------------------------------------------------------|
| Journal:                        | <i>BMJ Open</i>                                                                                                                                                                                                                                                                                                                                                                                                                                                                                                                                                                                     |
| Manuscript ID:                  | bmjopen-2013-004427.R1                                                                                                                                                                                                                                                                                                                                                                                                                                                                                                                                                                              |
| Article Type:                   | Research                                                                                                                                                                                                                                                                                                                                                                                                                                                                                                                                                                                            |
| Date Submitted by the Author:   | 13-Jan-2014                                                                                                                                                                                                                                                                                                                                                                                                                                                                                                                                                                                         |
| Complete List of Authors:       | Gao, Jing; Shanghai Cancer Institute, Xu, Hong-Li; Shanghai Cancer Institute, Gao, Shan; The First Affiliated Hospital of Zhengzhou University, Zhang, Wei; Shanghai Cancer Institute, Tan, Yu-Ting; Shanghai Cancer Institute, Rothman, Nat; National Cancer Institute, Purdue, Mark; National Cancer Institute, Gao, Yu-Tang; Shanghai Cancer Institute, Department of Epidemiology Zheng, Wei; Vanderbilt School of Medicine, Department of Medicine Shu, Xiao-Ou; Vanderbilt School of Medicine, Department of Medicine Xiang, Yong-bing; Shanghai Cancer Institute, Department of Epidemiology |
| <b>Primary Subject Heading</b>: | Epidemiology                                                                                                                                                                                                                                                                                                                                                                                                                                                                                                                                                                                        |
| Secondary Subject Heading:      | Oncology, Epidemiology, Gastroenterology and hepatology                                                                                                                                                                                                                                                                                                                                                                                                                                                                                                                                             |
| Keywords:                       | Epidemiology < ONCOLOGY, Hepatobiliary tumours < ONCOLOGY, Cancer genetics < GENETICS, EPIDEMIOLOGY                                                                                                                                                                                                                                                                                                                                                                                                                                                                                                 |
|                                 |                                                                                                                                                                                                                                                                                                                                                                                                                                                                                                                                                                                                     |

SCHOLARONE™  
Manuscripts

1  
2  
3 **Genetic polymorphism of *NFKB1* and *NFKBIA* genes and liver cancer risk: a**  
4 **nested case-control study in Shanghai, China**  
5  
6

7  
8 Jing Gao<sup>1,2</sup>, Hong-Li Xu<sup>2</sup>, Shan Gao<sup>3</sup>, Wei Zhang<sup>2</sup>, Yu-Ting Tan<sup>2</sup>, Nat Rothman<sup>4</sup>,  
9 Mark Purdue<sup>4</sup>, Yu-Tang Gao<sup>2</sup>, Wei Zheng<sup>5</sup>, Xiao-Ou Shu<sup>5</sup>, Yong-Bing Xiang<sup>1,2</sup>  
10

11  
12 **Affiliations:**  
13

- 14 1. State Key Laboratory of Oncogene and Related Genes, Shanghai Cancer Institute,  
15 Renji Hospital, Shanghai Jiaotong University School of Medicine, Shanghai, China.  
16 2. Department of Epidemiology, Shanghai Cancer Institute, Renji Hospital, Shanghai  
17 Jiaotong University School of Medicine, Shanghai, China.  
18 3. Department of Infection Management, The First Affiliated Hospital of Zhengzhou  
19 University, Zhengzhou, China.  
20 4. Division of Cancer Epidemiology and Genetics, National Cancer Institute,  
21 Rockville, USA.  
22 5. Division of Epidemiology, Department of Medicine, Vanderbilt Epidemiology  
23 Center, Vanderbilt-Ingram Cancer Center, Vanderbilt University School of Medicine,  
24 Nashville, USA.  
25  
26  
27  
28

29 **Corresponding author**

30 Prof. Y. B. Xiang,  
31 Shanghai Cancer Institute  
32 Renji Hospital  
33 Shanghai Jiaotong University School of Medicine  
34 No. 25, Lane 2200, Xie Tu Road  
35 Shanghai 200032  
36 P. R. China  
37 Telephone: 86-21-64437002  
38 Fax: 86-21-64046550  
39 E-mail: ybxiang@shsci.org  
40  
41  
42  
43

44 **Key words:** genetic polymorphisms, *NFKB1*, *NFKBIA*, primary liver cancer,  
45 susceptibility  
46  
47

48 **Word count: 2911 (Text)**  
49

50 **Tables: 5**

51 **Figures: 0**

52 **Supplemental tables: 0**  
53  
54  
55  
56  
57  
58  
59  
60



## ABSTRACT

**Objectives:** Genetic variations of NF- $\kappa$ B signaling pathway were found to be associated with inflammatory diseases and several malignancies. However, little is known about NF- $\kappa$ B pathway gene polymorphisms and susceptibility of liver cancer. The aim of this study was to investigate whether genetic variants of *NFKB1* and *NFKBIA* were associated with risk of liver cancer in a Chinese population.

**Design:** The study was designed as a nested case-control study within two prospective cohorts (the Shanghai Women's Health Study, SWHS, 1996–2000 and the Shanghai Men's Health Study, SMHS, 2002–2006).

**Settings:** This population-based study was conducted in urban Shanghai, China.

**Participants:** A total of 217 incident liver cancer cases diagnosed through December 31, 2009 and 427 healthy controls matched by sex, age at baseline ( $\pm 2$  years) and date ( $\pm 30$  days) of sample collection were included in the study.

**Primary and secondary outcome measures:** Genetic polymorphisms of *NFKB1* and *NFKBIA* were determined by TaqMan SNP genotyping assay blindly. OR and its 95% CIs were estimated by unconditional logistic regression model to measure the association between selected SNPs and the risk of liver cancer.

**Results:** After adjusted for potential confounding factors, rs28362491 ins/del or del/del genotypes were associated with higher risk of liver cancer with an adjusted OR of 1.54(95%CI: 1.04-2.28). rs230496 AG and GG genotypes were also noted with higher risk of liver cancer with an adjusted OR of 1.53 (95%CI: 1.03-2.26). Haplotype analysis indicated that carriers of the *NFKB1* GA and AA (rs230525-rs230530) haplotypes had higher risk of liver cancer under additive model. No association was observed between *NFKBIA* variants and risk of live cancer.

**Conclusions:** Our results suggest that genetic variants of *NFKB1* influence liver cancer susceptibility in Chinese population, although replication in other studies is needed.

### Article summary-strengths and limitations of this study

- This study was the first population-based study to evaluate the polymorphic variants of NF- $\kappa$ B and risk of liver cancer.
- Only incident cases from two prospective cohorts were included in the study which ruled out the possibility of recall and selection bias.
- The limitations of the study include relatively small sample size, unmeasured HBV infection, HCV infection and aflatoxin exposure. However, we did take into



1  
2  
3 consideration of the participants' history of hepatitis and liver cirrhosis, and the  
4 presents of HCV infection and aflatoxin are very low in the study population.  
5  
6  
7

## 8 INTRODUCTION

9  
10 Liver cancer is a common disorder worldwide which ranks the 5th and 7th most  
11 common cancer among men and women. It was estimated that more than 80% liver  
12 cancers occur in developing countries and about 54% occur in China<sup>1</sup>. Among the  
13 main risk factors for liver cancer, chronic infections of hepatitis B virus (HBV) and  
14 hepatitis C virus (HCV) are the most important in humans, accounting for more than  
15 70% of liver cancer cases worldwide<sup>2-4</sup>. Liver cirrhosis, heavy alcohol consumption,  
16 exposure to aflatoxin, and diabetes also account for part of liver cancer occurrence<sup>2-4</sup>.  
17  
18  
19  
20

21 Chronic inflammation has been widely accepted to play an important role in  
22 hepatocarcinogenesis. Most of the known risk factors of liver cancer such as HBV,  
23 HCV infection and alcohol drinking can cause persistent inflammatory reaction of the  
24 liver and promote cancer development<sup>5, 6</sup>. However, the molecular and cellular  
25 mechanisms linking inflammation and liver cancer remain unclear. Recent findings  
26 have suggested that NF- $\kappa$ B may play a crucial role in bridging the actions of growth  
27 factors and chronic inflammation to hepatic oncogenesis<sup>7-10</sup>.  
28  
29  
30  
31

32 NF- $\kappa$ B, a collection of dimeric transcription factors, was originally identified as  
33 a nuclear factor bound to the enhancer of the immunoglobulin  $\kappa$ -light chain gene<sup>11</sup>  
34 specific to B cells and presents in all cell types<sup>12</sup>. It is a major transcription regulator  
35 of the immune response, cell adhesion, differentiation, proliferation, and apoptosis<sup>13</sup>.  
36 NF- $\kappa$ B dimers are formed by seven distinct proteins: NF- $\kappa$ B1 (p105 and p50),  
37 NF- $\kappa$ B2 (p100 and p52), RelA (p65), RelB and c-Rel, of which NF- $\kappa$ B p50/RelA is  
38 the most common dimer form<sup>9</sup>. In the resting cell, most NF- $\kappa$ B dimers are inactivated  
39 in the cytoplasm by binding to specific inhibitors-I $\kappa$ B family, of which I $\kappa$ B $\alpha$  is the  
40 most common one. In the classical activation pathway, I $\kappa$ B is phosphorylated and  
41 degraded by I $\kappa$ B kinase complex, and then NF- $\kappa$ B dimers are released and translocate  
42 to the nucleus where they coordinate the transcriptional activation of target genes<sup>14</sup>.  
43 Several genetic variations of NF- $\kappa$ B signaling pathway have been reported to be  
44 associated with cancer risks such as breast<sup>15</sup>, prostate<sup>16</sup>, stomach<sup>17</sup>, colorectum<sup>18</sup> and  
45 mouth<sup>19</sup>. However, little is known about role of genetic polymorphisms of NF- $\kappa$ B  
46 genes and susceptibility of liver cancer.  
47  
48  
49  
50  
51  
52  
53  
54  
55

56 In a population based case-control study nested in two prospective cohorts of the  
57  
58  
59  
60

1  
2  
3  
4  
5  
6  
7  
8  
9  
10  
11  
12  
13  
14  
15  
16  
17  
18  
19  
20  
21  
22  
23  
24  
25  
26  
27  
28  
29  
30  
31  
32  
33  
34  
35  
36  
37  
38  
39  
40  
41  
42  
43  
44  
45  
46  
47  
48  
49  
50  
51  
52  
53  
54  
55  
56  
57  
58  
59  
60

Shanghai Women's and Men's Health Studies, we investigated the relationships between genetic variants of *NFKB1* and *NFKBIA*, two key genes involved in classic signaling pathway of NF- $\kappa$ B, and the risk of liver cancer among Chinese men and women.

## MATERIAL AND METHODS

### Study population

Participants of this study came from the Shanghai Women's Health Study (SWHS) and Shanghai Men's Health Study (SMHS). The design and methods used in these two studies have been described in detail elsewhere<sup>20-23</sup>. Briefly, the SWHS enrolled 74,941 women aged 40-74 years between March 1, 1997 and May 31, 2000, with a response rate of 92.7%. SMHS enrolled 61,491 men aged 40-74 years without history of cancer at recruitment from April 1, 2002 to June 30, 2006, with a response rate of 74.1%. Both studies were approved by the relevant Institutional Review Boards for human research in China and the United States and a written informed consent was obtained from all participants.

In-person interview was conducted by trained interviewers using a structured questionnaire at baseline to obtain information on demographics, lifestyle, dietary habits, medical history and other characteristics. Anthropometric measurements, including current weight, height and circumferences of the waist and hips, were also measured. Of the eligible participants, 56,831 (75.8%) of the SWHS and 46,332 (75.3%) of the SMHS provided a 10-ml blood sample at baseline. The samples were drawn into an EDTA Vacutainer tube and then kept in a portable styrofoam box with ice packs (at approximately 0-4°C) and processed within 6 hours for long-term storage at -70°C. A bio-specimen collection form was completed for each participant at the time of sample procurement which included the date and time of collection, time of last meal, and date of last menstruation, intake of selected foods, smoking, as well as use of any medications over the previous 24 hours and during the previous week.

### Cohort follow-up and outcome ascertainment

Both cohorts were followed for occurrence of cancer and other chronic diseases by active in-person surveys conducted every 2-3 years as well as annual record linkage to the databases of the population-based Shanghai Cancer Registry, Shanghai Vital Statistics Registry, and Shanghai Resident Registry. For the SWHS, four rounds of in-person follow-ups were completed and the response rates for the first

1  
2  
3 (2000-2002), second (2002-2004), third (2004-2007), and fourth (2008-2011)  
4 follow-up surveys were 99.8%, 98.7%, 96.7%, and 92.0%, respectively. For the  
5 SMHS, two rounds of follow-up surveys have completed. The response rates for the  
6 first (2004-2008) and second (2008-2011) follow-up surveys were 97.6% and 93.6%,  
7 respectively. For cohort members who developed liver cancer during the follow-up,  
8 medical chart were reviewed by a panel of oncologists to verify the diagnosis. Liver  
9 cancer data through December 31, 2009 was used for the present study.

10  
11  
12  
13  
14  
15  
16  
17  
18  
19  
20  
21  
22  
23  
24  
25  
26  
27  
28  
29  
30  
31  
32  
33  
34  
35  
36  
37  
38  
39  
40  
41  
42  
43  
44  
45  
46  
47  
48  
49  
50  
51  
52  
53  
54  
55  
56  
57  
58  
59  
60

Included in this nested case-control study are 217 incident liver cancer cases and 427 matched controls who had donated blood sample. Liver cancer cases were defined as having an International Classification of Disease, Ninth Revision (ICD-9), codes of 155.0 (primary malignant neoplasms), 155.1(malignant neoplasms of the intrahepatic bile ducts), or 155.2 (unspecified malignant neoplasms of the liver)<sup>24</sup>. Two control subjects were randomly selected from the cohorts who donated a blood sample at baseline and matched to each case for sex, age at baseline ( $\pm 2$  years) and date ( $\pm 30$  days) of sample collection. All controls were free of any cancer at the time of cancer diagnosis for the corresponding case.

### Genotyping

Single-nucleotide polymorphisms (SNPs) were selected based on both TagSNP and their putative functional significance. Tagging SNPs were selected by searching the Han Chinese data from the Hapmap project<sup>25</sup>. The following criteria were used to identify tagging SNPs: (i) SNPs located in the genes or within the 5-kb flanking region, (ii) a minor allele frequency  $\geq 0.05$ , and (iii) other unselected single-nucleotide polymorphisms could be captured by one of the tagging SNPs with a linkage disequilibrium of  $r^2 \geq 0.90$ . A total of 8 SNPs were selected for genotyping which were rs28362491, rs230530, rs230525, rs230496 for *NFKBI* and rs3138053, rs3138055, rs2273650, rs696 for *NFKBIA* (table 1). Genomic DNA was extracted from buffycoat using Promega DNA Extraction Kit according to the manufacturer's instructions (Promega Corporation, Madison, WI, USA). Genotyping were performed by the TaqMan assay, using the ABI PRISM 7900HT Sequence Detection System (Applied Biosystems, Foster City, CA, USA), in 384-wellformat, with dual fluorescent reporter probes VIC and FAM. The quality and potential misclassification of the genotyping results were assessed by evaluating 5% of duplicate DNA samples that were randomly selected from the whole samples. There replicates were 100% concordant. All serum samples were tested blindly and were identified only by an

unique identification number blinded with case-control status.

Table 1. Descriptions of Genetic Polymorphisms of the *NFKB1* and *NFKBIA* genes under investigation

| Gene          | Assay ID   | Sequence                                                        | Location     |
|---------------|------------|-----------------------------------------------------------------|--------------|
| <i>NFKB1</i>  | rs28362491 | CTCCGTGCTGCCTGCGTTCCCCGACC[-/ATTG]ATTGGGCC<br>CGGCAGGCGCTTCCTGG | 5'-near gene |
|               | rs230530   | TTTTTAGCACCAAACATCTTAATTT[A/G]CATTCAAATAAA<br>TGAGAACCACCAT     | intron       |
|               | rs230525   | TACGGGAAAAGTGATTCTTGTTTAC[A/G]GAGCCCTCTT<br>CACAGTTTCATGTT      | intron       |
|               | rs230496   | TGTCTGGATTGCTTGAGACAGCCC[A/G]GTTTGCCCTG<br>ACCTAATGTTTAT        | intron       |
| <i>NFKBIA</i> | rs3138053  | ATTCGTTTATGCTATCTGACCTACA[C/T]TGTGCTCCCGCA<br>GAAAAAGGATCGT     | 5'-near gene |
|               | rs3138055  | AATCAACGGGATGACAGAATGACAA[C/T]GGAGAGGTCT<br>CCAACCACAGGCCAA     | 3'-near gene |
|               | rs2273650  | AACAATACATTATGTACACCATTTA[C/T]AGGAGGGTAAC<br>ACAAACCTTGACAG     | 3'-UTR       |
|               | rs696      | CCTACCACAATAAGACGTTTTGGGC[C/T]AGGCAGTGTGC<br>AGTGTGGATATAAG     | 3'-UTR       |

### Statistical analysis

Subjects with both survey data and genotyping results were included in the final analysis. Means and percentages of selected characteristics for cases and controls were calculated. The distributions of selected characteristics were compared between cases and controls by either student's *t*-test (continuous variables) or  $\chi^2$  test (categorical variables). Odds ratio and its 95% confidence interval were estimated by unconditional logistic regression model to measure the association between selected SNPs and the risk of primary liver cancer. In the multivariable analysis, potential confounding factors were adjusted for, which include age (continuous variable); education level (four categories: elementary school or less, middle school, high school, and college or above); history of hepatitis (yes or no); family history of liver cancer (yes or no); and history of other chronic liver diseases or cirrhosis (yes or no). Statistical analyses were carried out using the SAS software package (version 9.2; SAS Institute, Cary, NC). Tests for trend were performed by entering categorical variables as continuous variables in the regression model. All P values were calculated by two-sided tests and were considered statistically significant if P was less than 0.05.

Hardy–Weinberg equilibrium and Linkage disequilibrium were assessed with HaploView version 4.0<sup>26</sup>. Associations between haplotypes and the risk of liver cancer were evaluated with HAPSTAT version 3.0 using the most common haplotype as the

1  
2  
3  
4  
5  
6  
7  
8  
9  
10  
11  
12  
13  
14  
15  
16  
17  
18  
19  
20  
21  
22  
23  
24  
25  
26  
27  
28  
29  
30  
31  
32  
33  
34  
35  
36  
37  
38  
39  
40  
41  
42  
43  
44  
45  
46  
47  
48  
49  
50  
51  
52  
53  
54  
55  
56  
57  
58  
59  
60

referent category, assuming an additive model<sup>27</sup>.

For peer review only

## RESULTS

Selected baseline characteristics of study participants were presented in table 2. The average ages of cases and control were 59.61 and 59.47. Compared with controls, liver cancer cases were more likely to have a lower education level, a history of hepatitis, a family history of liver cancer in first degree relatives, and history of chronic liver diseases or cirrhosis. Besides, male liver cancer cases were more probably to have lower body mass index, and be a non-regular exerciser compared to controls, although the difference were at borderline significance. Whereas in women, cases were more likely to have a history of type 2 diabetes than controls. No differences were observed in family income, smoking, drinking habits, waist to hip ratio, and family history of other cancers between the two groups.

The associations of *NFKB1* SNPs with liver cancer risk were summarized in table 3. The genotypes of rs28362491, rs230530 and rs230525 showed no deviation from Hardy-Weinberg equilibrium in controls except for rs230496. After adjusted for potential confounding factors, rs28362191 ins/del or del/del genotypes were associated with higher risk of liver cancer with an OR of 1.54(95%CI: 1.04-2.28). rs230496 AG and GG genotypes were also noted with higher risk of liver cancer with an adjusted OR of 1.53 (95%CI: 1.03-2.26). Carriers of rs230525 AG or GG genotypes had about 30% percent increased risk of liver cancer, but the risk was not insignificant. No association was found between rs230530 and liver cancer risk.

Table 4 presents the distribution of *NFKB1A* SNPs in cases and controls. The genotypes of rs3138055, rs696 and rs2273650 showed no deviation from Hardy-Weinberg equilibrium in controls but for rs3138053. Generally, all the four SNPs showed no relationship with liver cancer.

We further analyzed the haplotypes of these SNPs with risk of liver cancer (table 5). For *NFKB1* gene, two SNPs (rs230525, rs230530) demonstrated strong linkage disequilibrium ( $D' = 1.0$ ,  $r^2 = 0.59$ ). Compared to men carrying rs230525-rs230530 AG haplotype, those with GA or AA haplotypes were at increased risk of liver cancer with ORs of 1.46(95%CI: 1.05-2.03) and 1.81(95%CI: 1.15-2.86), respectively. For *NFKB1A*, rs3138053 and rs2273650 were in linkage disequilibrium ( $D' = 0.97$ ,  $r^2 = 0.31$ ) but none of the haplotypes was significantly associated with liver cancer.

Table 2. Distribution of selected characteristics in the study cases and controls†

| Characteristics                              | All subjects  |                  |        | Male          |                  |        | Female       |                  |        |
|----------------------------------------------|---------------|------------------|--------|---------------|------------------|--------|--------------|------------------|--------|
|                                              | Cases (N=217) | Controls (N=427) | P      | Cases (N=131) | Controls (N=262) | P      | Cases (N=86) | Controls (N=165) | P      |
| Age at interview, Mean±SD,                   | 59.61±9.56    | 59.47±9.55       | 0.853  | 60.05±9.93    | 59.86±9.95       | 0.858  | 58.95±8.98   | 58.85±8.87       | 0.928  |
| Education level (%)                          |               |                  |        |               |                  |        |              |                  |        |
| Elementary school or less                    | 63(29.30)     | 115(27.00)       |        | 18(13.95)     | 35(13.41)        |        | 45(52.33)    | 80(48.48)        |        |
| Middle school                                | 69(32.09)     | 148(37.74)       |        | 54(41.86)     | 104(39.85)       |        | 15(17.44)    | 44(26.67)        |        |
| High school                                  | 62(28.84)     | 91(21.36)        |        | 41(31.78)     | 61(23.37)        |        | 21(24.42)    | 30(18.18)        |        |
| College or above                             | 21(9.77)      | 72(16.90)        | 0.031  | 16(12.40)     | 61(23.37)        | 0.053  | 5(5.81)      | 11(6.67)         | 0.341  |
| Family income (%)†                           |               |                  |        |               |                  |        |              |                  |        |
| Low                                          | 50(23.04)     | 90(21.13)        |        | 17(12.98)     | 37(14.12)        |        | 33(38.37)    | 53(32.32)        |        |
| Medium                                       | 112(51.61)    | 208(48.83)       |        | 76(58.02)     | 130(49.62)       |        | 36(41.86)    | 78(47.56)        |        |
| High                                         | 55(25.35)     | 128(30.05)       | 0.454  | 38(29.01)     | 95(36.26)        | 0.271  | 17(19.77)    | 33(20.12)        | 0.606  |
| Ever smoked (%)                              | 93(42.86)     | 173(40.52)       | 0.569  | 90(68.70)     | 163(62.21)       | 0.206  | 3(3.49)      | 10(6.06)         | 0.384  |
| Ever drank alcohol (%)                       | 45(20.74)     | 98(22.95)        | 0.523  | 42(32.06)     | 97(37.02)        | 0.333  | 3(3.49)      | 1(0.61)          | 0.084  |
| Body mass index ,kg/m <sup>2</sup> , Mean±SD | 23.79±3.65    | 24.16±3.31       | 0.198  | 23.16±3.25    | 23.77±2.89       | 0.06   | 24.75±4.02   | 24.78±3.80       | 0.961  |
| WHR, Mean±SD                                 | 0.87±0.07     | 0.87±0.07        | 0.936  | 0.90±0.06     | 0.90±0.06        | 0.379  | 0.82±0.05    | 0.83±0.06        | 0.261  |
| Regular physical activity (%)                | 94(43.32)     | 207(48.48)       | 0.215  | 49(37.40)     | 124(47.33)       | 0.062  | 45(52.33)    | 83(50.30)        | 0.761  |
| physical activity, MET-hours/week            | 81.58±47.12   | 83.71±43.59      | 0.570  | 66.86±40.33   | 68.00±34.61      | 0.78   | 104.00±48.09 | 108.60±44.83     | 0.450  |
| History of hepatitis (%)                     | 74(34.10)     | 25(5.85)         | <0.001 | 57(43.51)     | 16(6.11)         | <0.001 | 17(19.77)    | 9(9.45)          | <0.001 |
| Family history of cancer (%)                 | 69(31.80)     | 116(27.17)       | 0.220  | 41(31.30)     | 70(26.72)        | 0.342  | 28(32.56)    | 46(27.88)        | 0.441  |
| Family history of liver cancer (%)           | 28(12.90)     | 18(4.22)         | <0.001 | 20(15.27)     | 10(3.82)         | <0.001 | 8(9.30)      | 8(4.85)          | 0.171  |
| History of type 2 diabetes (%)               | 25(11.52)     | 35(8.20)         | 0.171  | 14(10.69)     | 25(9.54)         | 0.72   | 11(12.79)    | 10(6.06)         | 0.068  |
| History of chronic liver disease or          | 35(16.13)     | 11(2.58)         | <0.001 | 26(19.85)     | 10(3.82)         | <0.001 | 9(10.47)     | 1(0.61)          | <0.001 |

\* Missing data was excluded from the analysis

† Family income level (low income for <5000 yuan/year in the SWHS and <12 000 yuan/year in the SMHS; medium income for 5000 to <10 000 yuan/year in the SWHS and 12 000 to <24 000 yuan/year in the SMHS; and high income for >10 000 yuan/year in the SWHS and >24 000 yuan/year in the SMHS)

Table 3. *NFKB1* genetic polymorphisms with the risk of primary liver cancer

| SNPs               | Cases | Controls | P for $\chi^2$ | OR*   | 95%CI     | OR <sup>†</sup> | 95%CI     | OR <sup>‡</sup> | 95%CI     |
|--------------------|-------|----------|----------------|-------|-----------|-----------------|-----------|-----------------|-----------|
| rs28362491         |       |          |                |       |           |                 |           |                 |           |
| ins/ins            | 68    | 171      |                | 1.00  | -         | 1.00            | -         | 1.00            | -         |
| ins/del            | 102   | 160      |                | 1.60  | 1.10-2.33 | 1.60            | 1.10-2.33 | 1.71            | 1.13-2.60 |
| del/del            | 40    | 79       | 0.047          | 1.27  | 0.79-2.05 | 1.27            | 0.79-2.04 | 1.21            | 0.71-2.05 |
| <i>P for trend</i> |       |          |                | 0.144 |           | 0.146           |           | 0.233           |           |
| ins/del or del/del | 142   | 239      | 0.023          | 1.50  | 1.05-2.12 | 1.49            | 1.05-2.12 | 1.54            | 1.04-2.28 |
| rs230496           |       |          |                |       |           |                 |           |                 |           |
| AA                 | 64    | 164      |                | 1.00  | -         | 1.00            | -         | 1.00            | -         |
| AG                 | 101   | 169      |                | 1.53  | 1.05-2.24 | 1.53            | 1.05-2.24 | 1.68            | 1.10-2.58 |
| GG                 | 47    | 91       | 0.087          | 1.33  | 0.84-2.09 | 1.32            | 0.84-2.09 | 1.25            | 0.75-2.09 |
| <i>P for trend</i> |       |          |                | 0.141 |           | 0.143           |           | 0.235           |           |
| AG or GG           | 148   | 260      | 0.041          | 1.46  | 1.03-2.08 | 1.46            | 1.03-2.08 | 1.53            | 1.03-2.26 |
| rs230525           |       |          |                |       |           |                 |           |                 |           |
| AA                 | 79    | 186      |                | 1.00  | -         | 1.00            | -         | 1.00            | -         |
| AG                 | 102   | 175      |                | 1.38  | 0.96-1.97 | 1.38            | 0.96-1.98 | 1.46            | 0.98-2.18 |
| GG                 | 32    | 63       | 0.224          | 1.20  | 0.73-1.98 | 1.20            | 0.73-1.97 | 1.11            | 0.63-1.94 |
| <i>P for trend</i> |       |          |                | 0.236 |           | 0.236           |           | 0.347           |           |
| AG or GG           | 134   | 238      | 0.100          | 1.33  | 0.95-1.87 | 1.33            | 0.95-1.87 | 1.36            | 0.94-1.99 |
| rs230530           |       |          |                |       |           |                 |           |                 |           |
| AA                 | 64    | 114      |                | 1.00  | -         | 1.00            | -         | 1.00            | -         |
| AG                 | 99    | 175      |                | 1.01  | 0.68-1.49 | 1.01            | 0.68-1.49 | 1.05            | 0.68-1.62 |
| GG                 | 48    | 129      | 0.102          | 0.66  | 0.42-1.04 | 0.66            | 0.42-1.04 | 0.67            | 0.40-1.12 |
| <i>P for trend</i> |       |          |                | 0.079 |           | 0.078           |           | 0.132           |           |
| AG or GG           | 147   | 304      | 0.423          | 0.86  | 0.60-1.24 | 0.86            | 0.60-1.24 | 0.89            | 0.59-1.34 |

\*Adjusted for age

<sup>†</sup>Adjusted for age, sex.<sup>‡</sup>Adjusted for age, sex, education level, family history of liver cancer, history of hepatitis, and chronic liver diseases or cirrhosis.



Table 4. *NFKB1A* genetic polymorphisms with the risk of primary liver cancer

| SNPs               | Cases | Controls | P     | OR*   | OR†       | OR‡                           |
|--------------------|-------|----------|-------|-------|-----------|-------------------------------|
| rs3138053          |       |          |       |       |           |                               |
| AA                 | 173   | 336      |       | 1.00  | -         | 1.00                          |
| AG                 | 21    | 48       |       | 0.85  | 0.49-1.47 | 0.84 0.48-1.45                |
| GG                 | 19    | 40       | 0.823 | 0.92  | 0.52-1.64 | 0.94 0.52-1.68                |
| <i>P for trend</i> |       |          |       | 0.638 |           | 0.653 0.920                   |
| AG or GG           | 40    | 88       | 0.556 | 0.88  | 0.58-1.34 | 0.88 0.58-1.34 0.97 0.61-1.54 |
| rs3138055          |       |          |       |       |           |                               |
| CC                 | 62    | 128      |       | 1.00  | -         | 1.00                          |
| CT                 | 109   | 215      |       | 1.05  | 0.72-1.54 | 1.05 0.72-1.54                |
| TT                 | 42    | 81       | 0.956 | 1.07  | 0.66-1.73 | 1.07 0.66-1.73                |
| <i>P for trend</i> |       |          |       | 0.772 |           | 0.771 0.276                   |
| CT or TT           | 151   | 296      | 0.778 | 1.06  | 0.74-1.51 | 1.06 0.74-1.52 1.25 0.83-1.88 |
| rs696              |       |          |       |       |           |                               |
| CC                 | 65    | 149      |       | 1.00  | -         | 1.00                          |
| CT                 | 115   | 196      |       | 1.35  | 0.93-1.96 | 1.35 0.93-1.96                |
| TT                 | 33    | 76       | 0.210 | 0.99  | 0.60-1.64 | 0.99 0.60-1.64                |
| <i>P for trend</i> |       |          |       | 0.694 |           | 0.695 0.360                   |
| CT or TT           | 148   | 272      | 0.218 | 1.25  | 0.88-1.78 | 1.25 0.88-1.78 1.38 0.93-2.06 |
| rs2273650          |       |          |       |       |           |                               |
| CC                 | 108   | 215      |       | 1.00  | -         | 1.00                          |
| CT                 | 84    | 173      |       | 0.97  | 0.68-1.37 | 0.97 0.68-1.37                |
| TT                 | 20    | 37       | 0.938 | 1.08  | 0.60-1.95 | 1.07 0.59-1.94                |
| <i>P for trend</i> |       |          |       | 0.937 |           | 0.945 0.493                   |
| CT or TT           | 104   | 210      | 0.933 | 0.99  | 0.71-1.38 | 0.99 0.71-1.37 0.86 0.60-1.24 |

\*Adjusted for age

† Adjusted for age, sex.

‡ Adjusted for age, sex, education level, family history of liver cancer, history of hepatitis, and chronic liver diseases or cirrhosis.

Table 5. ORs and 95% CIs for liver cancer in relation to *NFKB1*/*NFKB1A* haplotypes

|                                     | All subjects* |          |                 | Female† |          |                 | Male† |          |                 |
|-------------------------------------|---------------|----------|-----------------|---------|----------|-----------------|-------|----------|-----------------|
|                                     | Cases         | Controls | OR              | Cases   | Controls | OR              | Cases | Controls | OR              |
|                                     | (%)           | (%)      |                 | (%)     | (%)      |                 | (%)   |          |                 |
| <i>NFKB1</i> (rs230525-rs230530)    | n=215         | n=425    |                 | n=86    | n=165    |                 | n=129 | n=260    |                 |
| AG                                  | 46.49         | 52.01    | ref             | 52.14   | 49.39    | ref             | 42.69 | 53.53    | ref             |
| GA                                  | 38.973        | 35.50    | 1.23(0.95-1.58) | 36.47   | 36.59    | 0.94(0.63-1.41) | 40.55 | 34.88    | 1.46(1.05-2.03) |
| AA                                  | 14.54         | 12.49    | 1.30(0.91-1.86) | 11.39   | 14.02    | 0.77(0.42-1.39) | 16.76 | 11.59    | 1.81(1.15-2.86) |
| <i>NFKB1A</i> (rs3138055-rs2273650) |               |          |                 |         |          |                 |       |          |                 |
| TC                                  | 45.00         | 43.94    | ref             | 48.24   | 42.31    | ref             | 43.15 | 45.14    | ref             |
| CT                                  | 29.05         | 28.58    | 1.00(0.75-1.31) | 31.30   | 31.21    | 0.88(0.57-1.35) | 27.79 | 27.12    | 1.07(0.75-1.55) |
| CC                                  | 25.65         | 27.00    | 0.93(0.70-1.24) | 20.47   | 26.48    | 0.68(0.42-1.10) | 28.50 | 26.95    | 1.11(0.77-1.60) |

\* Adjusted for age and sex.

† Adjusted for age

## DISCUSSION

In this nested case-control study, we found that the variants of rs28362491 and rs230496 of *NFKB1* gene might be associated with risk of primary liver cancer. After adjusting for possible confounders, rs28362491 deletion allele and rs230496 AG or GG genotypes were found to increase the risk of liver cancer. In addition, haplotype analysis indicated that carriers of the *NFKB1* GA and AA (rs230525-rs230530) haplotypes had higher risk of liver cancer under additive model, although this association was only observed in man. These findings suggested that variants of NF- $\kappa$ B signaling pathway may play a role in liver cancer susceptibility.

*NFKB1* gene was mapped on chromosome 4q23-q24 and composed of 24 exons<sup>28</sup>. This gene encodes for two proteins-p105 and p50. p105 is a none-DNA binding protein and is activated to p50, a DNA binding protein by proteasome-mediated degradation. Several genetic polymorphisms were defined in *NFKB1* and researches have been focused on a common polymorphism of -94 del/ins (rs28362491) in the promoter region. Recent studies showed that genetic polymorphism of rs28362491 was associated with a number of cancer risks including sporadic breast cancer<sup>15</sup>, prostate cancer<sup>16</sup>, gastric cancer<sup>17</sup>, colorectal cancer<sup>18</sup>, and oral cancer<sup>19</sup>, but little is known about its relationship with liver cancer. He and his colleagues conducted a case-control study of 202 HCC cases of HBV carrier and 404 healthy controls without HBV infection. Results showed that after adjusting for age and gender, -94 ins/del and ins/ins genotypes might increase the risk of HCC, with ORs of 1.60 (95%CI:1.01-2.53) and 3.01 (95%CI:1.87-4.85), respectively<sup>29</sup>. A report from Taiwan also found ins allele more prevalent in HCC patients (OR=2.23,95%CI:1.32-3.77)<sup>30</sup>. In our study, we found that ins/del and del/del genotypes were more prevalent in liver cancer cases than controls. It was observed that the association of rs28362491 polymorphism with cancer susceptibility varied with cancer site and study populations. Ins allele was reported to increase the risk of oral cancer<sup>31</sup>, melanoma<sup>32</sup>, prostate cancer<sup>16</sup>, gastric cancer<sup>17</sup>, nasopharyngeal carcinoma<sup>33</sup> and cervical cancer<sup>34</sup>. Two studies in European found del allele might increase the risk of colorectal cancer<sup>35,36</sup>, while in Chinese population, none or even reverse association were obtained<sup>35,37</sup>. The difference of polymorphisms may probably result from interactions or combined effects with none genetic risk factors. Well-designed studies with larger sample size are needed to validate these findings.

To our knowledge, this is the first report on the variants of rs230496, rs230525 and rs230530 with liver cancer susceptibility. A study in European American descent found

1  
2  
3  
4 rs230530 polymorphism associated with alcohol dependence, and the evidence came  
5 primarily from those individuals who met criteria for alcoholism earlier<sup>38</sup>. As alcohol is  
6 one of the major risk factors of liver cancer, rs230530 might play a role in alcohol  
7 associated liver cancer. Unfortunately, subject to the limitation of relatively small  
8 samplesize, we were not able to explore this issue. In addition, although the functions of  
9 intronic SNPs are still obscure, studies have indicated that they can affect either local  
10 DNA or RNA secondary structure, thereby regulating gene expression<sup>39,40</sup>

11  
12  
13  
14 *NFKBIA* gene, which encodes I $\kappa$ B $\alpha$ , the inhibitor of *NFKBI*, was mapped to 14q13  
15 with six exons spanning approximately 3.5kb<sup>41</sup>. As a major component of I $\kappa$ B family,  
16 the dysfunction or down regulation of I $\kappa$ B $\alpha$  will lead to over activation of NF- $\kappa$ B.  
17 Epidemiological studies on *NFKBIA* were relatively rare. A 2758G/A polymorphysim  
18 (rs696) in 3' untranstated region might regulate the expression of I $\kappa$ B $\alpha$  and thus affect  
19 the activation of NF- $\kappa$ B. Sun et al. found the frequency of AG genotype was increased  
20 in Chinese patients  $\geq 50$  years of age (OR=3.06, 95% CI:1.55-6.02) with colorectal  
21 cancer<sup>42</sup>. Another study on breast cancer fail to obtain a significant association<sup>15</sup>. There  
22 was no previous report on rs696 and risk of liver cancer.

23  
24  
25  
26  
27  
28  
29  
30  
31  
32  
33  
34  
35  
36  
37  
38  
39  
40  
41  
42  
43  
44  
45  
46  
47  
48  
49  
50  
51  
52  
53  
54  
55  
56  
57  
58  
59  
60  
61  
62  
63  
64  
65  
66  
67  
68  
69  
70  
71  
72  
73  
74  
75  
76  
77  
78  
79  
80  
81  
82  
83  
84  
85  
86  
87  
88  
89  
90  
91  
92  
93  
94  
95  
96  
97  
98  
99  
100  
101  
102  
103  
104  
105  
106  
107  
108  
109  
110  
111  
112  
113  
114  
115  
116  
117  
118  
119  
120  
121  
122  
123  
124  
125  
126  
127  
128  
129  
130  
131  
132  
133  
134  
135  
136  
137  
138  
139  
140  
141  
142  
143  
144  
145  
146  
147  
148  
149  
150  
151  
152  
153  
154  
155  
156  
157  
158  
159  
160  
161  
162  
163  
164  
165  
166  
167  
168  
169  
170  
171  
172  
173  
174  
175  
176  
177  
178  
179  
180  
181  
182  
183  
184  
185  
186  
187  
188  
189  
190  
191  
192  
193  
194  
195  
196  
197  
198  
199  
200  
201  
202  
203  
204  
205  
206  
207  
208  
209  
210  
211  
212  
213  
214  
215  
216  
217  
218  
219  
220  
221  
222  
223  
224  
225  
226  
227  
228  
229  
230  
231  
232  
233  
234  
235  
236  
237  
238  
239  
240  
241  
242  
243  
244  
245  
246  
247  
248  
249  
250  
251  
252  
253  
254  
255  
256  
257  
258  
259  
260  
261  
262  
263  
264  
265  
266  
267  
268  
269  
270  
271  
272  
273  
274  
275  
276  
277  
278  
279  
280  
281  
282  
283  
284  
285  
286  
287  
288  
289  
290  
291  
292  
293  
294  
295  
296  
297  
298  
299  
300  
301  
302  
303  
304  
305  
306  
307  
308  
309  
310  
311  
312  
313  
314  
315  
316  
317  
318  
319  
320  
321  
322  
323  
324  
325  
326  
327  
328  
329  
330  
331  
332  
333  
334  
335  
336  
337  
338  
339  
340  
341  
342  
343  
344  
345  
346  
347  
348  
349  
350  
351  
352  
353  
354  
355  
356  
357  
358  
359  
360  
361  
362  
363  
364  
365  
366  
367  
368  
369  
370  
371  
372  
373  
374  
375  
376  
377  
378  
379  
380  
381  
382  
383  
384  
385  
386  
387  
388  
389  
390  
391  
392  
393  
394  
395  
396  
397  
398  
399  
400  
401  
402  
403  
404  
405  
406  
407  
408  
409  
410  
411  
412  
413  
414  
415  
416  
417  
418  
419  
420  
421  
422  
423  
424  
425  
426  
427  
428  
429  
430  
431  
432  
433  
434  
435  
436  
437  
438  
439  
440  
441  
442  
443  
444  
445  
446  
447  
448  
449  
450  
451  
452  
453  
454  
455  
456  
457  
458  
459  
460  
461  
462  
463  
464  
465  
466  
467  
468  
469  
470  
471  
472  
473  
474  
475  
476  
477  
478  
479  
480  
481  
482  
483  
484  
485  
486  
487  
488  
489  
490  
491  
492  
493  
494  
495  
496  
497  
498  
499  
500  
501  
502  
503  
504  
505  
506  
507  
508  
509  
510  
511  
512  
513  
514  
515  
516  
517  
518  
519  
520  
521  
522  
523  
524  
525  
526  
527  
528  
529  
530  
531  
532  
533  
534  
535  
536  
537  
538  
539  
540  
541  
542  
543  
544  
545  
546  
547  
548  
549  
550  
551  
552  
553  
554  
555  
556  
557  
558  
559  
560  
561  
562  
563  
564  
565  
566  
567  
568  
569  
570  
571  
572  
573  
574  
575  
576  
577  
578  
579  
580  
581  
582  
583  
584  
585  
586  
587  
588  
589  
590  
591  
592  
593  
594  
595  
596  
597  
598  
599  
600  
601  
602  
603  
604  
605  
606  
607  
608  
609  
610  
611  
612  
613  
614  
615  
616  
617  
618  
619  
620  
621  
622  
623  
624  
625  
626  
627  
628  
629  
630  
631  
632  
633  
634  
635  
636  
637  
638  
639  
640  
641  
642  
643  
644  
645  
646  
647  
648  
649  
650  
651  
652  
653  
654  
655  
656  
657  
658  
659  
660  
661  
662  
663  
664  
665  
666  
667  
668  
669  
670  
671  
672  
673  
674  
675  
676  
677  
678  
679  
680  
681  
682  
683  
684  
685  
686  
687  
688  
689  
690  
691  
692  
693  
694  
695  
696  
697  
698  
699  
700  
701  
702  
703  
704  
705  
706  
707  
708  
709  
710  
711  
712  
713  
714  
715  
716  
717  
718  
719  
720  
721  
722  
723  
724  
725  
726  
727  
728  
729  
730  
731  
732  
733  
734  
735  
736  
737  
738  
739  
740  
741  
742  
743  
744  
745  
746  
747  
748  
749  
750  
751  
752  
753  
754  
755  
756  
757  
758  
759  
760  
761  
762  
763  
764  
765  
766  
767  
768  
769  
770  
771  
772  
773  
774  
775  
776  
777  
778  
779  
780  
781  
782  
783  
784  
785  
786  
787  
788  
789  
790  
791  
792  
793  
794  
795  
796  
797  
798  
799  
800  
801  
802  
803  
804  
805  
806  
807  
808  
809  
810  
811  
812  
813  
814  
815  
816  
817  
818  
819  
820  
821  
822  
823  
824  
825  
826  
827  
828  
829  
830  
831  
832  
833  
834  
835  
836  
837  
838  
839  
840  
841  
842  
843  
844  
845  
846  
847  
848  
849  
850  
851  
852  
853  
854  
855  
856  
857  
858  
859  
860  
861  
862  
863  
864  
865  
866  
867  
868  
869  
870  
871  
872  
873  
874  
875  
876  
877  
878  
879  
880  
881  
882  
883  
884  
885  
886  
887  
888  
889  
890  
891  
892  
893  
894  
895  
896  
897  
898  
899  
900  
901  
902  
903  
904  
905  
906  
907  
908  
909  
910  
911  
912  
913  
914  
915  
916  
917  
918  
919  
920  
921  
922  
923  
924  
925  
926  
927  
928  
929  
930  
931  
932  
933  
934  
935  
936  
937  
938  
939  
940  
941  
942  
943  
944  
945  
946  
947  
948  
949  
950  
951  
952  
953  
954  
955  
956  
957  
958  
959  
960  
961  
962  
963  
964  
965  
966  
967  
968  
969  
970  
971  
972  
973  
974  
975  
976  
977  
978  
979  
980  
981  
982  
983  
984  
985  
986  
987  
988  
989  
990  
991  
992  
993  
994  
995  
996  
997  
998  
999  
1000

Of the four SNPs of *NFKBIA* gene evaluated, we did not observed an significant association. In previous studies, rs3138053 variant was found to be associated with hepatocellular carcinoma in a Chinese mainland population<sup>29</sup> but not Taiwanese<sup>30</sup>.

There are several strengths of our study. This study was based on two well-designed prospective cohort studies. To the best of our knowledge, it was the first population based study to evaluate the polymorphic variants of NF- $\kappa$ B and risk of liver cancer. All study participants were ethnic Chinese and residents of Shanghai with similar genetic background, which minimized the potential confounding of ethnics. Only incident cases were included which ruled out the possibility of recall and selection bias. Liver cancer cases were carefully verified with multiple approaches which minimized the disease misclassification. Also, we controlled potential confounding variables in the analysis. The limitations of our study should also be noted. Firstly, we focused on only two genes involved in canonical pathway of NF- $\kappa$ B, other regulatory genes in NF- $\kappa$ B signaling pathway may also contribute to the pathogenesis of liver cancer. Secondly, we did not test for HBV infection, HCV infection or aflatoxin exposure, so we cannot rule out the possible confoundings although the presents of HCV infection and aflatoxin are very low in the study population<sup>43</sup>, but we did take into consideration of the participants' history of hepatitis and liver cirrhosis. Finally, due to

1  
2  
3 the relatively small sample size, the frequencies of some homozygous variants were low  
4 in subgroups therefore reduced the statistical power and limited us from evaluating the  
5 joint effects in stratified analysis. Replication in other studies is needed.  
6  
7

8 In summary, in this nested case-control study, we provided additional evidence for  
9 a role of NF- $\kappa$ B SNPs and haplotypes in the etiology of liver cancer. Studies in larger,  
10 varied populations are warranted to confirm these findings. Furthermore, functional  
11 studies are required in order to explore the underlying mechanisms.  
12  
13

14  
15  
16 **Acknowledgements** We would like to thank the participants of the Shanghai Men's  
17 Health Study and the Shanghai Women's Health Study for the invaluable contribution to  
18 this work.  
19  
20

21  
22  
23 **Contributors** YBX obtained the funding, developed the research design, drafted the  
24 manuscript, interpreted the results, and also had primary responsibility for the final  
25 content; W Zheng and XOS designed, directed and obtained funding for the parent  
26 cohorts, and contributed to the revisions and interpretation of the results; JG obtained  
27 part of funding, drafted the manuscript, analyzed the data and interpreted the results; JG  
28 and HLX conducted experiments; All authors critically reviewed and approval  
29 manuscript.  
30  
31  
32  
33

34  
35  
36 **Funding** This work was supported by the funds of State Key Project Specialized for  
37 Infectious Diseases of China [No.2008ZX10002-015, No.2012ZX10002008-002 to YB  
38 Xiang]. Part of JG's effort on the study has been supported by research project of  
39 Shanghai Municipal Health Bureau [No.2008208]. The parent cohorts were supported  
40 by the grants (R37 CA070867 to W Zheng and R01 CA82729 to XO Shu) from the US  
41 National Institutes of Health.  
42  
43  
44

45  
46  
47 **Competing interests** None. The funding sponsor had no role in the study design, data  
48 collection, statistical analysis and result interpretation, as well as in the writing of the  
49 report and the decision to submit for publication. The corresponding author had full  
50 access to all data in the study and final responsibility for the decision to submit for  
51 publication.  
52  
53  
54  
55

56  
57  
58 **Study approval** Institutional review board.  
59  
60

1  
2  
3  
4 **Ethics approval** Vanderbilt University IRB and Shanghai Cancer Institute IRB.  
5  
6

7 **Provenance and peer review** Not commissioned; externally peer reviewed.  
8

9 **Data sharing statement** No additional data are available.  
10  
11  
12  
13  
14  
15  
16  
17  
18  
19  
20  
21  
22  
23  
24  
25  
26  
27  
28  
29  
30  
31  
32  
33  
34  
35  
36  
37  
38  
39  
40  
41  
42  
43  
44  
45  
46  
47  
48  
49  
50  
51  
52  
53  
54  
55  
56  
57  
58  
59  
60

For peer review only

**References:**

1. Ferlay J, Shin HR, Bray F, *et al.* GLOBOCAN 2008 v2.0, Cancer Incidence and Mortality Worldwide: IARC CancerBase No. 10 [Internet]. Lyon, France: International Agency for Research on Cancer, 2010. Cited 28 Sep 2013. Available from URL: <http://globocan.iarc.fr>.
2. Gao J, Xie L, Yang WS, *et al.* Risk factors of hepatocellular carcinoma-current status and perspectives. *Asian Pac J Cancer Prev* 2012; 13: 743-52.
3. Schottenfeld D, Fraumeni JF. Cancer epidemiology and prevention. 3rd ed. Oxford: Oxford University Press, 2006.
4. Boyle P, Levin B. World cancer report 2008. Lyon: International Agency for Research on Cancer, 2008.
5. Seitz HK, Stickel F. Molecular mechanisms of alcohol-mediated carcinogenesis. *Nat Rev Cancer* 2007; 7: 599-612.
6. Coussens LM, Werb Z. Inflammation and cancer. *Nature* 2002; 420: 860-7.
7. Arsura M, Cavin LG. Nuclear factor-kappaB and liver carcinogenesis. *Cancer Lett* 2005; 229: 157-69.
8. Pikarsky E, Porat RM, Stein I, *et al.* NF-kappaB functions as a tumour promoter in inflammation-associated cancer. *Nature* 2004; 431: 461-6.
9. He G, Karin M. NF-kappaB and STAT3 - key players in liver inflammation and cancer. *Cell Res* 2011; 21: 159-68.
10. Berasain C, Castillo J, Perugorria MJ, *et al.* Inflammation and liver cancer: new molecular links. *Ann NY Acad Sci* 2009; 1155: 206-21.
11. Sen R, Baltimore D. Multiple nuclear factors interact with the immunoglobulin enhancer sequences. *Cell* 1986; 46: 705-16.
12. Barnes PJ, Karin M. Nuclear factor-kappaB: a pivotal transcription factor in chronic inflammatory diseases. *N Engl J Med* 1997; 336: 1066-71.
13. Baldwin AJ. Series introduction: the transcription factor NF-kappaB and human disease. *J Clin Invest* 2001; 107: 3-6.
14. Karin M. Nuclear factor-kappaB in cancer development and progression. *Nature* 2006; 441: 431-6.
15. Curran JE, Weinstein SR, Griffiths LR. Polymorphic variants of NFKB1 and its inhibitory protein NFKBIA, and their involvement in sporadic breast cancer. *Cancer Lett* 2002; 188: 103-7.
16. Zhang P, Wei Q, Li X, *et al.* A functional insertion/deletion polymorphism in the promoter region of the NFKB1 gene increases susceptibility for prostate cancer. *Cancer Genet Cytogenet* 2009; 191: 73-7.
17. Lo SS, Chen JH, Wu CW, *et al.* Functional polymorphism of NFKB1 promoter may correlate to the susceptibility of gastric cancer in aged patients. *Surgery* 2009; 145: 280-5.
18. Yu Y, Liu H, Jin M, *et al.* The joint association of REST and NFKB1 polymorphisms on the risk of colorectal cancer. *Ann Hum Genet* 2012; 76: 269-76.
19. Lin CW, Hsieh YS, Hsin CH, *et al.* Effects of NFKB1 and NFKBIA gene polymorphisms on susceptibility to environmental factors and the clinicopathologic development of oral cancer. *PLoS*

- 1  
2  
3 *One* 2012; 7: e35078.
- 4 20. Shu XO, Yang G, Jin F, *et al.* Validity and reproducibility of the food frequency questionnaire  
5 used in the Shanghai Women's Health Study. *Eur J Clin Nutr* 2004; 58: 17-23.
- 6 21. Zheng W, Chow WH, Yang G, *et al.* The Shanghai Women's Health Study: rationale, study design,  
7 and baseline characteristics. *Am J Epidemiol* 2005; 162: 1123-31.
- 8 22. Villegas R, Yang G, Liu D, *et al.* Validity and reproducibility of the food-frequency questionnaire  
9 used in the Shanghai men's health study. *Br J Nutr* 2007; 97: 993-1000.
- 10 23. Cai H, Zheng W, Xiang YB, *et al.* Dietary patterns and their correlates among middle-aged and  
11 elderly Chinese men: a report from the Shanghai Men's Health Study. *Br J Nutr* 2007; 98: 1006-13.
- 12 24. World Health Organization. International Classification of Diseases, ninth revision (ICD-9).  
13 Geneva, Switzerland: World Health Organization, 1977.
- 14 25. de Bakker PI, McVean G, Sabeti PC, *et al.* A high-resolution HLA and SNP haplotype map for  
15 disease association studies in the extended human MHC. *Nat Genet* 2006; 38: 1166-72.
- 16 26. Barrett JC, Fry B, Maller J, *et al.* Haploview: analysis and visualization of LD and haplotype  
17 maps. *Bioinformatics* 2005; 21: 263-5.
- 18 27. Lin DY, Zeng D, Millikan R. Maximum likelihood estimation of haplotype effects and  
19 haplotype-environment interactions in association studies. *Genet Epidemiol* 2005; 29: 299-312.
- 20 28. Mathew S, Murty VV, Dalla-Favera R, *et al.* Chromosomal localization of genes encoding the  
21 transcription factors, c-rel, NF-kappa Bp50, NF-kappa Bp65, and lyt-10 by fluorescence in situ  
22 hybridization. *Oncogene* 1993; 8: 191-3.
- 23 29. He Y, Zhang H, Yin J, *et al.* IkappaBalpha gene promoter polymorphisms are associated with  
24 hepatocarcinogenesis in patients infected with hepatitis B virus genotype C. *Carcinogenesis* 2009;  
25 30: 1916-22.
- 26 30. Cheng CW, Su JL, Lin CW, *et al.* Effects of NFKB1 and NFKBIA gene polymorphisms on  
27 hepatocellular carcinoma susceptibility and clinicopathological features. *PLoS One* 2013; 8: e56130.
- 28 31. Lin SC, Liu CJ, Yeh WI, *et al.* Functional polymorphism in NFKB1 promoter is related to the  
29 risks of oral squamous cell carcinoma occurring on older male areca (betel) chewers. *Cancer Lett*  
30 2006; 243: 47-54.
- 31 32. Bu H, Rosdahl I, Sun XF, *et al.* Importance of polymorphisms in NF-kappaB1 and  
32 NF-kappaB1alpha genes for melanoma risk, clinicopathological features and tumor progression in  
33 Swedish melanoma patients. *J Cancer Res Clin Oncol* 2007; 133: 859-66.
- 34 33. Zhou B, Rao L, Li Y, *et al.* A functional insertion/deletion polymorphism in the promoter region  
35 of NFKB1 gene increases susceptibility for nasopharyngeal carcinoma. *Cancer Lett* 2009; 275: 72-6.
- 36 34. Zhou B, Qie M, Wang Y, *et al.* Relationship between NFKB1 -94 insertion/deletion ATTG  
37 polymorphism and susceptibility of cervical squamous cell carcinoma risk. *Ann Oncol* 2010; 21:  
38 506-11.
- 39 35. Lewander A, Butchi AK, Gao J, *et al.* Polymorphism in the promoter region of the NFKB1 gene  
40 increases the risk of sporadic colorectal cancer in Swedish but not in Chinese populations. *Scand J*  
41 *Gastroenterol* 2007; 42: 1332-8.
- 42 36. Andersen V, Christensen J, Overvad K, *et al.* Polymorphisms in NFkB, PXR, LXR and risk of  
43 colorectal cancer in a prospective study of Danes. *Bmc Cancer* 2010; 10: 484.
- 44  
45  
46  
47  
48  
49  
50  
51  
52  
53  
54  
55  
56  
57  
58  
59  
60



- 1  
2  
3 37. Song S, Chen D, Lu J, *et al.* NFkappaB1 and NFkappaBIA polymorphisms are associated with  
4 increased risk for sporadic colorectal cancer in a southern Chinese population. *PLoS One* 2011; 6:  
5 e21726.  
6  
7 38. Edenberg HJ, Xuei X, Wetherill LF, *et al.* Association of NFKB1, which encodes a subunit of the  
8 transcription factor NF-kappaB, with alcohol dependence. *Hum Mol Genet* 2008; 17: 963-70.  
9  
10 39. Lu L, Risch E, Deng Q, *et al.* An insulin-like growth factor-II intronic variant affects local DNA  
11 conformation and ovarian cancer survival. *Carcinogenesis* 2013;34:2024-30.  
12  
13 40. Lu L, Katsaros D, Mayne ST, *et al.* Functional study of risk loci of stem cell-associated gene  
14 lin-28B and associations with disease survival outcomes in epithelial ovarian cancer. *Carcinogenesis*  
15 2012;33:2119-25.  
16  
17 41. Le Beau MM, Ito C, Cogswell P, *et al.* Chromosomal localization of the genes encoding the  
18 p50/p105 subunits of NF-kappa B (NFKB2) and the I kappa B/MAD-3 (NFKBI) inhibitor of  
19 NF-kappa B to 4q24 and 14q13, respectively. *Genomics* 1992; 14: 529-31.  
20  
21 42. Gao J, Pfeifer D, He LJ, *et al.* Association of NFKBIA polymorphism with colorectal cancer risk  
22 and prognosis in Swedish and Chinese populations. *Scand J Gastroenterol.* 2007; 42: 345-50.  
23  
24 43. Yuan JM, Ross RK, Stanczyk FZ, *et al.* A cohort study of serum testosterone and hepatocellular  
25 carcinoma in Shanghai, China. *Int J Cancer* 1995; 63: 491-3.  
26  
27  
28  
29  
30  
31  
32  
33  
34  
35  
36  
37  
38  
39  
40  
41  
42  
43  
44  
45  
46  
47  
48  
49  
50  
51  
52  
53  
54  
55  
56  
57  
58  
59  
60

1  
2  
3  
4  
5  
6  
7  
8  
9  
10  
11  
12  
13  
14  
15  
16  
17  
18  
19  
20  
21  
22  
23  
24  
25  
26  
27  
28  
29  
30  
31  
32  
33  
34  
35  
36  
37  
38  
39  
40  
41  
42  
43  
44  
45  
46  
47  
48  
49  
50  
51  
52  
53  
54  
55  
56  
57  
58  
59  
60

**Genetic polymorphism of *NFKB1* and *NFKBIA* genes and liver cancer risk: a nested case-control study in Shanghai, China**

Jing Gao<sup>1,2</sup>, Hong-Li Xu<sup>2</sup>, Shan Gao<sup>3</sup>, Wei Zhang<sup>2</sup>, Yu-Ting Tan<sup>2</sup>, Nat Rothman<sup>4</sup>, Mark Purdue<sup>4</sup>, Yu-Tang Gao<sup>2</sup>, Wei Zheng<sup>5</sup>, Xiao-Ou Shu<sup>5</sup>, Yong-Bing Xiang<sup>1,2</sup>

**Affiliations:**

1. State Key Laboratory of Oncogene and Related Genes, Shanghai Cancer Institute, Renji Hospital, Shanghai Jiaotong University School of Medicine, Shanghai, China.
2. Department of Epidemiology, Shanghai Cancer Institute, Renji Hospital, Shanghai Jiaotong University School of Medicine, Shanghai, China.
3. Department of Infection Management, The First Affiliated Hospital of Zhengzhou University, Zhengzhou, China.
4. Division of Cancer Epidemiology and Genetics, National Cancer Institute, Rockville, USA.
5. Division of Epidemiology, Department of Medicine, Vanderbilt Epidemiology Center, Vanderbilt-Ingram Cancer Center, Vanderbilt University School of Medicine, Nashville, USA.

**Corresponding author**

Prof. Y. B. Xiang,  
Shanghai Cancer Institute  
Renji Hospital  
Shanghai Jiaotong University School of Medicine  
No. 25, Lane 2200, Xie Tu Road  
Shanghai 200032  
P. R. China  
Telephone: 86-21-64437002  
Fax: 86-21-64046550  
E-mail: ybxiang@shsci.org

**Key words:** genetic polymorphisms, *NFKB1*, *NFKBIA*, primary liver cancer, susceptibility

**Word count:** ~~2668~~2911 (Text)

**Tables:** 5

**Figures:** 0

**Supplemental tables:** 0

**ABSTRACT**

**Objectives:** Genetic variations of NF-κB signaling pathway were found to be associated with inflammatory diseases and several malignancies. However, little is known about NF-κB pathway gene polymorphisms and susceptibility of liver cancer. The aim of this study was to investigate whether genetic variants of NFKB1 and NFKBIA were associated with risk of liver cancer in a Chinese population.

**Design:** The study was designed as a nested case-control study within two prospective cohorts (the Shanghai Women's Health Study, SWHS, 1996–2000 and the Shanghai Men's Health Study, SMHS, 2002–2006).

**Settings:** This population-based study was conducted in urban Shanghai, China.

**Participants:** A total of ~~248–217~~ incident liver cancer cases diagnosed through December 31, ~~2011–2009~~ and ~~436–427~~ healthy controls matched by sex, age at baseline (±2 years) and date (±30 days) of sample collection were included in the study.

**Primary and secondary outcome measures:** Genetic polymorphisms of *NFKB1* and *NFKBIA* were determined by TaqMan SNP genotyping assay blindly. ORs and its 95% CIs were estimated by unconditional logistic regression model to measure the association between selected SNPs and the risk of liver cancer.

**Results:** After adjusted for potential confounding factors, rs28362491 ins/del or del/del genotypes were associated with higher risk of liver cancer with an adjusted OR of 1.~~5054~~(95%CI: 1.~~0204~~-2.~~4928~~). rs230496 AG and GG genotypes were also noted with higher risk of liver cancer with an adjusted OR of 1.~~49–53~~ (95%CI: 1.~~0403~~-2.~~2426~~). Haplotype analysis indicated that carriers of the *NFKB1* GA and AA (rs230525-rs230530) haplotypes had higher risk of liver cancer under additive model. No ~~assieiation~~-~~association~~ was observed between *NFKBIA* variants and risk of liver cancer.

**Conclusions:** Our results suggest that genetic variants of *NFKB1* influence liver cancer susceptibility in Chinese population, although replication in other studies is needed.

**Article summary-strengths and limitations of this study**

- This study was the first population-based study to evaluate the polymorphic variants of NF-κB and risk of liver cancer.
- Only incident cases from two prospective cohorts were included in the study which ruled out the possibility of recall and selection bias.

- 1  
2  
3  
4  
5  
6  
7  
8  
9  
10  
11  
12
- The limitations of the study include relatively small sample size, unmeasured HBV infection, HCV infection and aflatoxin exposure. However, we did take into consideration of the participants' history of hepatitis and liver cirrhosis, and the presents of HCV infection and aflatoxin are very low in the study population.

## 13 INTRODUCTION

14  
15  
16  
17  
18  
19  
20  
21  
22  
23  
24  
25  
26

Liver cancer is a common disorder worldwide which ranks the 5th and 7th most common cancer among men and women. It was estimated that more than 80% liver cancers occur in developing countries and about 54% occur in China<sup>1</sup>. Among the main risk factors for liver cancer, chronic infections of hepatitis B virus (HBV) and hepatitis C virus (HCV) are the most important in humans, accounting for more than 70% of liver cancer cases worldwide<sup>2-4</sup>. Liver cirrhosis, heavy alcohol consumption, exposure to aflatoxin~~-B1~~, and diabetes also account for part of liver cancer occurrence<sup>2-4</sup>.

27  
28  
29  
30  
31  
32  
33  
34  
35  
36

Chronic inflammation has been widely accepted to play an important role in hepatocarcinogenesis. Most of the known risk factors of liver cancer such as HBV, HCV infection and alcohol drinking can cause persistent inflammatory reaction of the liver and promote cancer development<sup>5, 6</sup>. However, the molecular and cellular mechanisms linking inflammation and liver cancer remain unclear. Recent findings have suggested that NF- $\kappa$ B may play a crucial role in bridging the actions of growth factors and chronic inflammation to hepatic oncogenesis<sup>7-10</sup>.

37  
38  
39  
40  
41  
42  
43  
44  
45  
46  
47  
48  
49  
50  
51  
52  
53  
54  
55

NF- $\kappa$ B, a collection of dimeric transcription factors, was originally identified as a nuclear factor ~~specific to B cells~~ bound to the ~~B-site enhancer~~ of the immunoglobulin  $\kappa$ -light chain gene ~~enhancer~~<sup>11</sup> specific to B cells and presents in all cell types<sup>12</sup>. It is a major transcription regulator of the immune response, cell adhesion, differentiation, proliferation, and apoptosis<sup>13</sup>. NF- $\kappa$ B dimers are formed by seven distinct proteins: NF- $\kappa$ B1 (p105 and p50), NF- $\kappa$ B2 (p100 and p52), RelA (p65), RelB and c-Rel, of which NF- $\kappa$ B p50/RelA is the most common dimer form<sup>9</sup>. In the resting cell, most NF- $\kappa$ B dimers are inactivated in the cytoplasm by binding to specific inhibitors-I $\kappa$ B family, of which I $\kappa$ B $\alpha$  is the most common one. In the classical activation pathway, I $\kappa$ B is phosphorylated and degraded by I $\kappa$ B kinase complex, and then NF- $\kappa$ B dimers are released and ~~translocated~~translocate to the nucleus where they coordinate the transcriptional activation of target genes<sup>14</sup>. Several genetic variations of NF- $\kappa$ B signaling pathway have been reported to be associated with cancer risks such

1  
2  
3  
4  
5  
6 as breast<sup>15</sup>, prostate<sup>16</sup>, stomach<sup>17</sup>, colorectum<sup>18</sup> and mouth<sup>19</sup>. However, little is known  
7 about role of genetic polymorphisms of NF-κB genes and susceptibility of liver  
8 cancer.  
9

10  
11 In a population based case-control study nested in two prospective cohorts of the  
12 Shanghai Women's and Men's Health Studies, we investigated the relationships  
13 between genetic variants of *NFKB1* and *NFKBIA*, two key genes involved in classic  
14 signaling pathway of NF-κB, and the risk of ~~LIVER-CANCER~~ liver cancer among  
15 Chinese men and women.  
16

## 17 MATERIAL AND METHODS

### 18 Study population

19  
20 Participants of this study came from the Shanghai Women's Health Study  
21 (SWHS) and Shanghai Men's Health Study (SMHS). The design and methods used in  
22 these two studies have been described in detail elsewhere<sup>20-23</sup>. Briefly, the SWHS  
23 enrolled 74,941 women aged 40-74 years between March 1, 1997 and May 31, 2000,  
24 with a response rate of 92.7%. SMHS enrolled 61,491 men aged 40-74 years without  
25 history of cancer at recruitment from April 1, 2002 to June 30, 2006, with a response  
26 rate of 74.1%. Both studies were approved by the relevant Institutional Review  
27 Boards for human research in China and the United States and a written informed  
28 consent was obtained from all participants.  
29

30  
31 In-person interview was conducted by trained interviewers using a structured  
32 questionnaire at baseline to obtain information on demographics, lifestyle, dietary  
33 habits, medical history and other characteristics. Anthropometric measurements,  
34 including current weight, height and circumferences of the waist and hips, were also  
35 measured. Of the eligible participants, 56,831 (75.8%) of the SWHS and 46,332  
36 (75.3%) of the SMHS provided a 10-ml blood sample at baseline. The samples were  
37 drawn into an EDTA Vacutainer tube and then kept in a portable styrofoam box with  
38 ice packs (at approximately 0-4°C) and processed within 6 hours for long-term  
39 storage at -70°C. A bio-specimen collection form was completed for each participant  
40 at the time of sample procurement which included the date and time of collection,  
41 time of last meal, and date of last menstruation, intake of selected foods, smoking, as  
42 well as use of any medications over the previous 24 hours and during the previous  
43 week.  
44

### 45 Cohort follow-up and outcome ascertainment

46 Both cohorts were followed for occurrence of cancer and other chronic diseases  
47  
48  
49  
50  
51

1  
2  
3  
4  
5  
6  
7  
8  
9  
10  
11  
12  
13  
14  
15  
16  
17  
18  
19  
20  
21  
22  
23  
24  
25  
26  
27  
28  
29  
30  
31  
32  
33  
34  
35  
36  
37  
38  
39  
40  
41  
42  
43  
44  
45  
46  
47  
48  
49  
50  
51  
52  
53  
54  
55  
56  
57  
58  
59  
60

by active in-person surveys conducted every 2-3 years as well as annual record linkage to the databases of the population-based Shanghai Cancer Registry, Shanghai Vital Statistics Registry, and Shanghai Resident Registry. For the SWHS, four rounds of in-person follow-ups were completed and the response rates for the first (2000-2002), second (2002-2004), third (2004-2007), and fourth (2008-2011) follow-up surveys were 99.8%, 98.7%, 96.7%, and 92.0%, respectively. For the SMHS, two rounds of follow-up surveys have completed. The response rates for the first (2004-2008) and second (2008-2011) follow-up surveys were 97.6% and 93.6%, respectively. For cohort members who developed liver cancer during the follow-up, medical chart were reviewed by a panel of oncologists to verify the diagnosis. Liver cancer data through December 31, ~~2011-2009~~ was used for the present study.

Included in this nested case-control study are ~~218-217~~ incident liver cancer cases and ~~436-427~~ matched controls who had donated blood sample. Liver cancer cases were defined as having an International Classification of Disease, Ninth Revision (ICD-9), codes of 155.0 (primary malignant neoplasms), 155.1(malignant neoplasms of the intrahepatic bile ducts), or 155.2 (unspecified malignant neoplasms of the liver)<sup>24</sup>. Two control subjects were randomly selected from the cohorts who donated a blood sample at baseline and matched to each case for sex, age at baseline ( $\pm 2$  years) and date ( $\pm 30$  days) of sample collection. All controls were free of any cancer at the time of cancer diagnosis for the corresponding case.

### Genotyping

Single-nucleotide polymorphisms (SNPs) were selected based on both TagSNP and their putative functional significance. Tagging SNPs were selected by searching the Han Chinese data from the Hapmap project<sup>25</sup>. The following criteria were used to identify tagging SNPs: (i) SNPs located in the genes or within the 5-kb flanking region, (ii) a minor allele frequency  $\geq 0.05$ , and (iii) other unselected single-nucleotide polymorphisms could be captured by one of the tagging SNPs with a linkage disequilibrium of  $r^2 \geq 0.90$ . A total of 8 SNPs were selected for genotyping which were rs28362491, rs230530, rs230525, rs230496 for *NFKB1* and rs3138053, rs3138055, rs2273650, rs696 for *NFKBIA* (table 1). Genomic DNA was extracted from buffycoat using Promega DNA Extraction Kit according to the manufacturer's instructions (Promega Corporation, Madison, WI, USA). Genotyping were performed by the TaqMan assay, using the ABI\_PRISM 7900HT Sequence Detection System (Applied Biosystems, Foster City, CA, USA), in 384-wellformat, with dual

fluorescent reporter probes VIC and FAM. The quality and potential misclassification of the genotyping results were assessed by evaluating 5% of duplicate DNA samples that were randomly selected from the whole samples. There replicates were 100% concordant. All serum samples were tested blindly and were identified only by a unique identification number blinded with case-control status.

Table 1. Descriptions of Genetic Polymorphisms of the *NFKB1* and *NFKB1A* genes under investigation

| Gene          | Assay ID   | Sequence                                                       | Location     |
|---------------|------------|----------------------------------------------------------------|--------------|
| <i>NFKB1</i>  | rs28362491 | CTCCGTGCTGCCTGCGTTCCCCGACC[-/ATTG]ATTGGGCC<br>CGGCAGGCGTTCCTGG | 5'-near gene |
|               | rs230530   | TTTTTAGCACCAACATCTTAATTT[A/G]CATTCAAATAAA<br>TGAGAACCACCAT     | intron       |
|               | rs230525   | TACGGGAAAAGTGATTCTTGTTTAC[A/G]GAGCCCTCTTT<br>CACAGTTTCATGTT    | intron       |
|               | rs230496   | TGTCTGGATTGCTTGAGACAGCCC[A/G]GTTTGCCCTG<br>ACCTAATTGTTTAT      | intron       |
| <i>NFKB1A</i> | rs3138053  | ATTCGTTTATGCTATCTGACCTACA[C/T]TGTGCTCCCGCA<br>GAAAAAGGATCGT    | 5'-near gene |
|               | rs3138055  | AATCAACGGGATGACAGAATGACAA[C/T]GGAGAGGTCT<br>CCAACCACAGGCCAA    | 3'-near gene |
|               | rs2273650  | AACAATACATTATGTACACCATTTA[C/T]AGGAGGGTAAC<br>ACAAACCTTGACAG    | 3'-UTR       |
|               | rs696      | CCTACCACAATAAGACGTTTGGGC[C/T]AGGCAGTGTGC<br>AGTGTGGATATAAG     | 3'-UTR       |

### Statistical analysis

Subjects with both survey data and genotyping results were included in the final analysis. Means and percentages of selected characteristics for cases and controls were calculated. The distributions of selected characteristics were compared between cases and controls by either student's *t*-test (continuous variables) or  $\chi^2$  test (categorical variables). Odds ratio and its 95% confidence interval were estimated by unconditional logistic regression model to measure the association between selected SNPs and the risk of primary liver cancer. In the multivariable analysis, potential confounding factors were adjusted for, which include age (continuous variable); education level (four categories: elementary school or less, middle school, high school, and college or above); history of hepatitis (yes or no); family history of liver cancer (yes or no); and history of other chronic liver diseases or cirrhosis (yes or no). Statistical analyses were carried out using the SAS software package (version 9.2; SAS Institute, Cary, NC). Tests for trend were performed by entering categorical variables as continuous variables in the regression model. All P values were calculated

1  
2  
3  
4  
5  
6  
7 by two-sided tests and were considered statistically significant if P was less than 0.05.

8 Hardy–Weinberg equilibrium and Linkage disequilibrium were accessed with  
9 HaploView version 4.0<sup>26</sup>. Associations between haplotypes and the risk of liver cancer  
10 were evaluated with HAPSTAT version 3.0 using the most common haplotype as the  
11 referent category, assuming an additive model<sup>27</sup>.  
12  
13  
14  
15  
16  
17  
18  
19  
20  
21  
22  
23  
24  
25  
26  
27  
28  
29  
30  
31  
32  
33  
34  
35  
36  
37  
38  
39  
40  
41  
42  
43  
44  
45  
46  
47  
48  
49  
50  
51  
52  
53  
54  
55  
56  
57  
58  
59  
60

For peer review only



## RESULTS

Selected baseline characteristics of study participants were presented in table 2. The average ages of cases and control were 59.65-61 and 59.4847. Compared with controls, liver cancer cases were more likely to have a lower education level, a history of hepatitis, a family history of liver cancer in first degree relatives, and history of chronic liver diseases or cirrhosis. Besides, male liver cancer cases were more probably to have lower body mass index, and be a non-regular exerciser compared to controls, although the difference were at borderline significance. Whereas in women, cases were more likely to have a history of type 2 diabetes than controls. No differences were observed in family income, smoking, drinking habits, waist to hip ratio, and family history of other cancers between the two groups.

The associations of *NFKB1* SNPs with liver cancer risk were summarized in table 3. The genotypes of rs28362491, rs230530 and rs230525 showed no deviation from Hardy-Weinberg equilibrium in controls except for rs230496. After adjusted for potential confounding factors, rs28362191 ins/del or del/del genotypes were associated with higher risk of liver cancer with an OR of 1.5054(95%CI: 1.0204-2.4928). rs230496 AG and GG genotypes were also noted with higher risk of liver cancer with an adjusted OR of 1.49-53 (95%CI: 1.0403-2.2426). Carriers of rs230525 AG or GG genotypes had about 30% percent increased risk of liver cancer, but the risk was not insignificant. No association was found between rs230530 and liver cancer risk.

Table 4 presents the distribution of *NFKB1A* SNPs in cases and controls. The genotypes of rs3138055, rs696 and rs2273650 showed no deviation from Hardy-Weinberg equilibrium in controls but for rs3138053. Generally, all the four SNPs showed no relationship with liver cancer.

We further analyzed the haplotypes of these SNPs with risk of liver cancer (table 5). For *NFKB1* gene, two SNPs (rs230525, rs230530) demonstrated strong linkage disequilibrium ( $D' = 1.0$ ,  $r^2 = 0.5859$ ). Compared to men carrying rs230525-rs230530 AG haplotype, those with GA or AA haplotypes were at increased risk of liver cancer with ORs of 1.46(95%CI: 1.05-2.03) and 1.81(95%CI: 1.15-2.86), respectively. For *NFKB1A*, rs3138053 and rs2273650 were in linkage disequilibrium ( $D' = 0.97$ ,  $r^2 = 0.31$ ) but none of the haplotypes was significantly associated with liver cancer.

Table 2. Distribution of selected characteristics in the study cases and controls<sup>†</sup>

| Characteristics                              | All subjects |             |        | Male        |             |        | Female       |              |        |
|----------------------------------------------|--------------|-------------|--------|-------------|-------------|--------|--------------|--------------|--------|
|                                              | Cases        | Controls    | PP     | Cases       | Controls    | PP     | Cases        | Controls     | PP     |
| Age at interview, Mean±SD,                   | 59.61±9.56   | 59.47±9.55  | 0.8530 | 60.05±9.93  | 59.86±9.95  | 0.8580 | 58.95±8.98   | 58.85±8.87   | 0.9280 |
| Education level (%)                          |              |             |        |             |             |        |              |              |        |
| Elementary school or less                    | 63(29.30)    | 115(27.00)  |        | 18(13.95)   | 35(13.41)   |        | 45(52.33)    | 80(48.48)    |        |
| Middle school                                | 69(32.09)    | 148(37.74)  |        | 54(41.86)   | 104(39.85)  |        | 15(17.44)    | 44(26.67)    |        |
| High school                                  | 62(28.84)    | 91(21.36)   |        | 41(31.78)   | 61(23.37)   |        | 21(24.42)    | 30(18.18)    |        |
| College or above                             | 21(9.77)     | 72(16.90)   | 0.0310 | 16(12.40)   | 61(23.37)   | 0.0530 | 5(5.81)      | 11(6.67)     | 0.3410 |
| Family income (%) <sup>†</sup>               |              |             |        |             |             |        |              |              |        |
| Low                                          | 50(23.04)    | 90(21.13)   |        | 17(12.98)   | 37(14.12)   |        | 33(38.37)    | 53(32.32)    |        |
| Medium                                       | 112(51.61)   | 208(48.83)  |        | 76(58.02)   | 130(49.62)  |        | 36(41.86)    | 78(47.56)    |        |
| High                                         | 55(25.35)    | 128(30.05)  | 0.4540 | 38(29.01)   | 95(36.26)   | 0.2710 | 17(19.77)    | 33(20.12)    | 0.6060 |
| Ever smoked (%)                              | 93(42.86)    | 173(40.52)  | 0.5690 | 90(68.70)   | 163(62.21)  | 0.2060 | 3(3.49)      | 10(6.06)     | 0.3840 |
| Ever drank alcohol (%)                       | 45(20.74)    | 98(22.95)   | 0.5230 | 42(32.06)   | 97(37.02)   | 0.3330 | 3(3.49)      | 1(0.61)      | 0.0840 |
| Body mass index ,kg/m <sup>2</sup> , Mean±SD | 23.79±3.65   | 24.16±3.31  | 0.1980 | 23.16±3.25  | 23.77±2.89  | 0.0600 | 24.75±4.02   | 24.78±3.80   | 0.9610 |
| WHR, Mean±SD                                 | 0.87±0.07    | 0.87±0.07   | 0.9360 | 0.90±0.06   | 0.90±0.06   | 0.3790 | 0.82±0.05    | 0.83±0.06    | 0.2610 |
| Regular physical activity (%)                | 94(43.32)    | 207(48.48)  | 0.2150 | 49(37.40)   | 124(47.33)  | 0.0620 | 45(52.33)    | 83(50.30)    | 0.7610 |
| physical activity, MET-hours/week            | 81.58±47.12  | 83.71±43.59 | 0.5700 | 66.86±40.33 | 68.00±34.61 | 0.7807 | 104.00±48.09 | 108.60±44.83 | 0.4500 |
| History of hepatitis (%)                     | 74(34.10)    | 25(5.85)    | <0.001 | 57(43.51)   | 16(6.11)    | <0.001 | 17(19.77)    | 9(9.45)      | <0.001 |
| Family history of cancer (%)                 | 69(31.80)    | 116(27.17)  | 0.2200 | 41(31.30)   | 70(26.72)   | 0.3420 | 28(32.56)    | 46(27.88)    | 0.4410 |
| Family history of liver cancer (%)           | 28(12.90)    | 18(4.22)    | <0.001 | 20(15.27)   | 10(3.82)    | <0.001 | 8(9.30)      | 8(4.85)      | 0.1710 |
| History of type 2 diabetes (%)               | 25(11.52)    | 35(8.20)    | 0.1710 | 14(10.69)   | 25(9.54)    | 0.7207 | 11(12.79)    | 10(6.06)     | 0.0680 |
| History of chronic liver disease or          | 35(16.13)    | 11(2.58)    | <0.001 | 26(19.85)   | 10(3.82)    | <0.001 | 9(10.47)     | 1(0.61)      | <0.001 |

\* Missing data was excluded from the analysis

<sup>†</sup> Family income level (low income for <5000 yuan/year in the SWHS and <12 000 yuan/year in the SMHS; medium income for 5000 to <10 000 yuan/year in the SWHS and 12 000 to <24 000 yuan/year in the SMHS; and high income for >10 000 yuan/year in the SWHS and >24 000 yuan/year in the SMHS)

Formatted: Not Highlight

1  
2  
3  
4  
5  
6  
7  
8  
9  
10  
11  
12  
13  
14  
15  
16  
17  
18  
19  
20  
21  
22  
23  
24  
25  
26  
27  
28  
29  
30  
31  
32  
33  
34  
35  
36  
37  
38  
39  
40  
41  
42  
43  
44  
45  
46  
47  
48  
49

Table 3. *NFKB1* genetic polymorphisms with the risk of primary liver cancer

| SNPs               | Cases  | Controls | P for $\chi^2$ | OR*      | 95%CI       | OR†      | 95%CI       | OR‡     | 95%CI       |
|--------------------|--------|----------|----------------|----------|-------------|----------|-------------|---------|-------------|
| rs28362491         |        |          |                |          |             |          |             |         |             |
| ins/ins            | 6869   | 171474   |                | 1.004-00 | --          | 1.004-00 | --          | 1.004-0 | --          |
|                    |        |          |                |          |             |          |             | 0       |             |
| ins/del            | 102402 | 160466   |                | 1.604-55 | 1.10-2.334- | 1.604-55 | 1.10-2.334- | 1.714-6 | 1.13-2.604- |
|                    |        |          |                |          |             |          |             | 4       | 09-2.49     |
| del/del            | 4040   | 7979     | 0.0470-06      | 1.274-28 | 0.79-2.050- | 1.274-28 | 0.79-2.040- | 1.214-2 | 0.71-2.050- |
|                    |        |          | 9              |          | 80-2.05     |          | 80-2.05     | 4       | 71-2.04     |
| <i>P for trend</i> |        |          |                | 0.1440-4 |             | 0.1460-4 |             | 0.2330- |             |
|                    |        |          |                | 48       |             | 48       |             | 246     |             |
| ins/del or del/del | 142442 | 239245   | 0.0230-03      | 1.504-46 | 1.05-2.124- | 1.494-46 | 1.05-2.124- | 1.544-5 | 1.04-2.284- |
|                    |        |          | 4              |          | 03-2.07     |          | 03-2.07     | 0       | 02-2.24     |
| rs230496           |        |          |                |          |             |          |             |         |             |
| AA                 | 6465   | 164467   |                | 1.004-00 | --          | 1.004-00 | --          | 1.004-0 | --          |
|                    |        |          |                |          |             |          |             | 0       |             |
| AG                 | 101404 | 169473   |                | 1.534-50 | 1.05-2.244- | 1.534-50 | 1.05-2.244- | 1.684-6 | 1.10-2.584- |
|                    |        |          |                |          | 03-2.19     |          | 03-2.19     | 4       | 08-2.50     |
| GG                 | 4747   | 9192     | 0.0870-10      | 1.334-32 | 0.84-2.090- | 1.324-34 | 0.84-2.090- | 1.254-2 | 0.75-2.090- |
|                    |        |          | 6              |          | 84-2.07     |          | 84-2.07     | 4       | 74-2.05     |
| <i>P for trend</i> |        |          |                | 0.1410-4 |             | 0.1430-4 |             | 0.2350- |             |
|                    |        |          |                | 52       |             | 52       |             | 259     |             |
| AG or GG           | 148448 | 260265   | 0.0410-04      | 1.464-44 | 1.03-2.084- | 1.464-44 | 1.03-2.084- | 1.534-4 | 1.03-2.264- |
|                    |        |          | 4              |          | 04-2.04     |          | 04-2.04     | 9       | 04-2.24     |
| rs230525           |        |          |                |          |             |          |             |         |             |
| AA                 | 7980   | 186489   |                | 1.004-00 | --          | 1.004-00 | --          | 1.004-0 | --          |
|                    |        |          |                |          |             |          |             | 0       |             |
| AG                 | 102402 | 175480   |                | 1.384-34 | 0.96-1.970- | 1.384-35 | 0.96-1.980- | 1.464-4 | 0.98-2.180- |
|                    |        |          |                |          | 94-1.92     |          | 94-1.92     | 2       | 95-2.14     |
| GG                 | 3232   | 6364     | 0.2240-27      | 1.204-18 | 0.73-1.980- | 1.204-18 | 0.73-1.970- | 1.114-0 | 0.63-1.940- |
|                    |        |          | 7              |          | 72-1.95     |          | 72-1.95     | 8       | 62-1.89     |

For peer review only

|                    |                   |                   |                      |                        |                        |                        |                        |
|--------------------|-------------------|-------------------|----------------------|------------------------|------------------------|------------------------|------------------------|
| <i>P for trend</i> |                   |                   | <del>0.2360-2</del>  |                        | <del>0.2360-2</del>    |                        | <del>0.3470-</del>     |
|                    |                   |                   | 68                   |                        | 58                     |                        | 402                    |
| AG or GG           | <del>134134</del> | <del>238244</del> | <del>0.1000-12</del> | <del>1.331-30</del>    | <del>0.95-1.870-</del> | <del>1.331-30</del>    | <del>0.95-1.870-</del> |
|                    |                   |                   | 7                    |                        | 93-1.82                |                        | 93-1.82                |
|                    |                   |                   |                      |                        |                        | 3                      | 91-1.93                |
| rs230530           |                   |                   |                      |                        |                        |                        |                        |
| AA                 | <del>6464</del>   | <del>114116</del> | <del>1.001-00</del>  | <del>-</del>           | <del>1.001-00</del>    | <del>-</del>           | <del>1.001-0</del>     |
|                    |                   |                   |                      |                        |                        |                        | 0                      |
| AG                 | <del>9999</del>   | <del>175181</del> | <del>1.010-99</del>  | <del>0.68-1.490-</del> | <del>1.010-99</del>    | <del>0.68-1.490-</del> | <del>1.051-0</del>     |
|                    |                   |                   |                      | 67-1.46                |                        | 67-1.47                | 3                      |
|                    |                   |                   |                      |                        |                        |                        | 67-1.59                |
| GG                 | <del>4849</del>   | <del>129130</del> | <del>0.1020-15</del> | <del>0.660-68</del>    | <del>0.42-1.040-</del> | <del>0.660-68</del>    | <del>0.42-1.040-</del> |
|                    |                   |                   | 2                    |                        | 44-1.07                |                        | 44-1.07                |
|                    |                   |                   |                      |                        |                        | 0                      | 42-1.15                |
| <i>P for trend</i> |                   |                   | <del>0.0790-1</del>  |                        | <del>0.0780-1</del>    |                        | <del>0.1320-</del>     |
|                    |                   |                   |                      |                        |                        |                        | 169                    |
| AG or GG           | <del>147148</del> | <del>304311</del> | <del>0.4230-42</del> | <del>0.860-86</del>    | <del>0.60-1.240-</del> | <del>0.860-86</del>    | <del>0.60-1.240-</del> |
|                    |                   |                   | 6                    |                        | 60-1.24                |                        | 60-1.24                |
|                    |                   |                   |                      |                        |                        | 9                      | 60-1.34                |

\*Adjusted for age

† Adjusted for age, sex.

‡ Adjusted for age, sex, education level, family history of liver cancer, history of hepatitis, and chronic liver diseases or cirrhosis.

Table 4. *NFKB1A* genetic polymorphisms with the risk of primary liver cancer

| SNPs               | Cases             | Controls          | P  | OR*                 | OR†                    | OR‡                    |
|--------------------|-------------------|-------------------|----|---------------------|------------------------|------------------------|
| rs3138053          |                   |                   |    |                     |                        |                        |
| AA                 | <del>173174</del> | <del>336342</del> |    | <del>1.001-0</del>  | <del>-</del>           | <del>1.001-0</del>     |
|                    |                   |                   |    | 0                   |                        | 0                      |
| AG                 | <del>2121</del>   | <del>4851</del>   |    | <del>0.850-8</del>  | <del>0.49-1.470-</del> | <del>0.840-8</del>     |
|                    |                   |                   | 1  | 47-1.39             |                        | 47-1.39                |
|                    |                   |                   |    |                     |                        | 2                      |
|                    |                   |                   |    |                     |                        | 51-1.64                |
| GG                 | <del>1919</del>   | <del>4040</del>   |    | <del>0.8230-7</del> | <del>0.920-9</del>     | <del>0.52-1.640-</del> |
|                    |                   |                   | 36 | 3                   | 53-1.66                | 4                      |
|                    |                   |                   |    |                     |                        | 53-1.68                |
|                    |                   |                   |    |                     |                        | 8                      |
|                    |                   |                   |    |                     |                        | 51-1.89                |
| <i>P for trend</i> |                   |                   |    | <del>0.6380-</del>  |                        | <del>0.6530-</del>     |
|                    |                   |                   |    | 618                 |                        | 611                    |
|                    |                   |                   |    |                     |                        | 861                    |
| AG or GG           | <del>4040</del>   | <del>8891</del>   |    | <del>0.5560-4</del> | <del>0.880-8</del>     | <del>0.58-1.340-</del> |
|                    |                   |                   | 87 | 6                   | 57-1.31                | 6                      |
|                    |                   |                   |    |                     |                        | 57-1.31                |
|                    |                   |                   |    |                     |                        | 4                      |
|                    |                   |                   |    |                     |                        | 60-1.49                |

1  
2  
3  
4  
5  
6  
7  
8  
9  
10  
11  
12  
13  
14  
15  
16  
17  
18  
19  
20  
21  
22  
23  
24  
25  
26  
27  
28  
29  
30  
31  
32  
33  
34  
35  
36  
37  
38  
39  
40  
41  
42  
43  
44  
45  
46  
47  
48  
49

| rs3138055          |               |                              |                     |                     |   |        |   |  |  |
|--------------------|---------------|------------------------------|---------------------|---------------------|---|--------|---|--|--|
| CC                 | 6263 128429   | 1.00+0                       | -                   | 1.00+0              | - | 1.00+0 | - |  |  |
|                    |               | 0                            |                     | 0                   |   | 0      |   |  |  |
| CT                 | 109409 215220 | 1.05+0 0.72-1.540-           | 1.05+0 0.72-1.540-  | 1.22+1 0.79-1.870-  |   |        |   |  |  |
|                    |               | 2 70-1.49                    | 2 70-1.49           | 7 76-1.80           |   |        |   |  |  |
| TT                 | 4242 8184     | 0.9560-9 1.07+0 0.66-1.730-  | 1.07+0 0.66-1.730-  | 1.33+2 0.78-2.270-  |   |        |   |  |  |
|                    |               | 95 2 63-1.65                 | 2 63-1.65           | 6 74-2.14           |   |        |   |  |  |
| <i>P for trend</i> |               | 0.7720-                      | 0.7710-             | 0.2760-             |   |        |   |  |  |
|                    |               | 923                          | 923                 | 379                 |   |        |   |  |  |
| CT or TT           | 151454 296304 | 0.7780-9 1.06+0 0.74-1.510-  | 1.06+0 0.74-1.520-  | 1.25+2 0.83-1.880-  |   |        |   |  |  |
|                    |               | 26 2 71-1.46                 | 2 71-1.46           | 0 80-1.79           |   |        |   |  |  |
| rs696              |               |                              |                     |                     |   |        |   |  |  |
| CC                 | 6566 149450   | 1.00+0                       | -                   | 1.00+0              | - | 1.00+0 | - |  |  |
|                    |               | 0                            |                     | 0                   |   | 0      |   |  |  |
| CT                 | 115445 196202 | 1.35+3 0.93-1.960-           | 1.35+3 0.93-1.960-  | 1.47+4 0.97-2.230-  |   |        |   |  |  |
|                    |               | 0 90-1.88                    | 0 90-1.88           | 1 93-2.13           |   |        |   |  |  |
| TT                 | 3333 7678     | 0.2100-2 0.990-9 0.60-1.640- | 0.990-9 0.60-1.640- | 1.17+1 0.67-2.030-  |   |        |   |  |  |
|                    |               | 68 6 58-1.58                 | 6 58-1.58           | 2 64-1.94           |   |        |   |  |  |
| <i>P for trend</i> |               | 0.6940-                      | 0.6950-             | 0.3600-             |   |        |   |  |  |
|                    |               | 822                          | 823                 | 459                 |   |        |   |  |  |
| CT or TT           | 148448 272280 | 0.2180-3 1.25+2 0.88-1.780-  | 1.25+2 0.88-1.780-  | 1.38+3 0.93-2.060-  |   |        |   |  |  |
|                    |               | 04 0 85-1.71                 | 0 85-1.71           | 3 89-1.97           |   |        |   |  |  |
| rs2273650          |               |                              |                     |                     |   |        |   |  |  |
| CC                 | 108408 215334 | 1.00+0                       | -                   | 1.00+0              | - | 1.00+0 | - |  |  |
|                    |               | 0                            |                     | 0                   |   | 0      |   |  |  |
| CT                 | 8485 173476   | 0.970-9 0.68-1.370-          | 0.970-9 0.68-1.370- | 0.860-8 0.58-1.260- |   |        |   |  |  |
|                    |               | 9 70-1.40                    | 9 70-1.40           | 8 60-1.30           |   |        |   |  |  |
| TT                 | 2020 3737     | 0.9380-9 1.08+1 0.60-1.950-  | 1.07+1 0.59-1.940-  | 0.890-9 0.45-1.730- |   |        |   |  |  |
|                    |               | 34 1 61-1.99                 | 1 61-2.00           | 2 47-1.79           |   |        |   |  |  |
| <i>P for trend</i> |               | 0.9370-                      | 0.9450-             | 0.4930-             |   |        |   |  |  |
|                    |               | 834                          | 830                 | 596                 |   |        |   |  |  |

CT or TT ~~104105 210213~~ ~~0.9330-9 0.991-0 0.71-1.380- 0.991-0 0.71-1.370- 0.860-8 0.60-1.240-~~  
~~59 + 73-1.41 + 73-1.41 9 62-1.28~~

\*Adjusted for age

† Adjusted for age, sex.

‡ Adjusted for age, sex, education level, family history of liver cancer, history of hepatitis, and chronic liver diseases or cirrhosis.

Table 5. ORs and 95% CIs for liver cancer in relation to *NFKBI/NFKBIA* haplotypes

|                                     | All subjects* |              |                                | Female†   |              |                                | Male†     |              |                                |
|-------------------------------------|---------------|--------------|--------------------------------|-----------|--------------|--------------------------------|-----------|--------------|--------------------------------|
|                                     | Cases (%)     | Controls (%) | OR                             | Cases (%) | Controls (%) | OR                             | Cases (%) | Controls (%) | OR                             |
| <i>NFKBI</i> (rs230525-rs230530)    | n=215         | n=425        |                                | n=86n=8   | n=165n=1     |                                | n=129n=1  | n=260n=2     |                                |
| )                                   | 46.4946.7     | 52.0151.     | refref                         | 52.1452.  | 49.3949.1    | refref                         | 42.6942.6 | 53.5353.5    | refref                         |
| AG                                  | 4             | 85           |                                | 70        | 3            |                                | 9         | 3            |                                |
|                                     | 38.97338.     | 35.5035.     | 1.23(0.95-1.58)1.21(0.94-1.56) | 36.4736.  | 36.5936.7    | 0.94(0.63-1.41)0.92(0.62-1.36) | 40.5540.5 | 34.8834.8    | 1.46(1.05-2.03)1.46(1.05-2.03) |
| GA                                  | 79            | 57           |                                | 05        | 1            |                                | 5         | 8            |                                |
|                                     | 14.5414.4     | 12.4912.     | 1.30(0.91-1.86)1.28(0.89-1.82) | 11.3911.  | 14.0214.1    | 0.77(0.42-1.39)0.74(0.41-1.33) | 16.7616.7 |              | 1.81(1.15-2.86)1.81(1.15-2.86) |
| AA                                  | 7             | 58           |                                | 25        | 6            |                                | 6         | 11.5911.59   | 2.86)                          |
| <i>NFKBIA</i> (rs3138055-rs2273650) |               |              |                                |           |              |                                |           |              |                                |
| TC                                  | 45.0044.7     | 43.9444.     | refref                         | 48.2447.  | 42.3143.2    | refref                         | 43.1543.1 | 45.1445.1    | refref                         |
|                                     | 8             | 30           |                                | 67        | 8            |                                | 5         | 4            |                                |
|                                     | 29.0529.1     | 28.5828.     | 1.00(0.75-1.31)1.02(0.77-1.34) | 31.3031.  | 31.2130.4    | 0.88(0.57-1.35)0.94(0.61-1.44) | 27.7927.7 | 27.1227.1    | 1.07(0.75-1.55)1.07(0.75-1.55) |
| CT                                  | 5             | 33           |                                | 51        | 6            |                                | 9         | 2            |                                |
|                                     | 25.6525.7     | 27.0026.     | 0.93(0.70-1.24)0.95(0.72-1.27) | 20.4720.  | 26.4826.2    | 0.68(0.42-1.10)0.72(0.45-1.15) | 28.5028.5 | 26.9526.9    | 1.11(0.77-1.60)1.11(0.77-1.60) |
| CC                                  | 6             | 90           |                                | 81        | 6            |                                | 0         | 5            | -60)                           |

\* Adjusted for age and sex.

† Adjusted for age

## DISCUSSION

In this nested case-control study, we found that the variants of rs28362491 and rs230496 of *NFKB1* gene might be associated with risk of primary liver cancer. After adjusting for possible confounders, rs28362491 deletion allele and rs230496 AG or GG genotypes were found to increase the risk of liver cancer. In addition, haplotype analysis indicated that carriers of the *NFKB1* GA and AA (rs230525-rs230530) haplotypes had higher risk of liver cancer under additive model, although this association was only observed in man. These findings suggested that variants of NF-κB signaling pathway may play a role in liver cancer susceptibility.

*NFKB1* gene was mapped on chromosome 4q23-q24 and composed of 24 exons<sup>28</sup>. This gene encodes for two proteins ~~p105 and p50~~. p105 is a none-DNA binding protein and is activated to p50, a DNA binding protein by proteasome-mediated degradation. Several genetic polymorphisms were defined in *NFKB1* and researches have been focused on a common polymorphism of -94 del/ins (rs28362491) in the promoter region. Recent studies showed that genetic polymorphism of rs28362491 was associated with a number of cancer risks including sporadic breast cancer<sup>15</sup>, prostate cancer<sup>16</sup>, gastric cancer<sup>17</sup>, colorectal cancer<sup>18</sup>, and oral cancer<sup>19</sup>, but little is known about its relationship with liver cancer. ~~Cao-He~~ and his colleagues conducted a case-control study of 202 HCC cases of HBV carrier and 404 healthy controls without HBV infection. Results showed that after adjusting for age and gender, -94 ins/del and ins/ins genotypes might increase the risk of HCC, with ORs of 1.60 (95%CI:1.01-2.53) and 3.01 (95%CI:1.87-4.85), respectively<sup>29</sup>. A report from Taiwan also found ins allele more prevalent in HCC patients (OR=2.23,95%CI:1.32-3.77)<sup>30</sup>. In our study, we found that ins/del and del/del genotypes were more prevalent in liver cancer cases than controls. It was observed that the association of rs28362491 polymorphism with cancer susceptibility varied with cancer site and study populations. Ins allele was reported to increase the risk of oral cancer<sup>31</sup>, melanoma<sup>32</sup>, prostate cancer<sup>16</sup>, gastric cancer<sup>17</sup>, nasopharyngeal carcinoma<sup>33</sup> and cervical cancer<sup>34</sup>. Two studies in European found del allele might increase the risk of colorectal cancer<sup>35, 36</sup>, while in Chinese population, none or even reverse association were obtained<sup>35, 37</sup>. The difference of polymorphisms may probably result from interactions or combined effects with none genetic risk factors. Well-designed studies with larger sample size are needed to validate these findings.

To our knowledge, this is the first report on the variants of rs230496, rs230525 and rs230530 with liver cancer susceptibility. A study in European American descent found

rs230530 polymorphism associated with alcohol dependence, and the evidence came primarily from those individuals who met criteria for alcoholism earlier<sup>38</sup>. As alcohol is one of the major risk factors of liver cancer, rs230530 might play a role in alcohol associated liver cancer. Unfortunately, subject to the limitation of relatively small sample size, we were not able to explore this issue. In addition, although the functions of intronic SNPs are still obscure, studies have indicated that they can affect either local DNA or RNA secondary structure, thereby regulating gene expression<sup>39,40</sup>

*NFKBIA* gene, which encodes I $\kappa$ B $\alpha$ , the inhibitor of *NFKBI*, was mapped to 14q13 with six exons spanning approximately 3.5kb<sup>41,39</sup>. As a major component of I $\kappa$ B family, the dysfunction or down regulation of I $\kappa$ B $\alpha$  will lead to over activation of NF- $\kappa$ B. Epidemiological studies on *NFKBIA* were relatively rare. A 2758G/A polymorphism (rs696) in 3' untranslated region might regulate the expression of I $\kappa$ B $\alpha$  and thus affect the activation of NF- $\kappa$ B. Sun et al. found the frequency of AG genotype was increased in Chinese patients  $\geq 50$  years of age (OR=3.06, 95% CI:1.55-6.02) with colorectal cancer<sup>42,40</sup>. Another study on breast cancer fail to obtain a significant association<sup>15</sup>. There was no previous report on rs696 and risk of liver cancer.

Of the four SNPs of *NFKBIA* gene evaluated, we did not observed an significant association. In previous studies, rs3138053 variant was found to be associated with hepatocellular carcinoma in a Chinese mainland population<sup>29</sup> but not Taiwanese<sup>30</sup>.

There are several strengths of our study. This study was based on two well-designed prospective cohort studies. To the best of our knowledge, it was the first population based study to evaluate the polymorphic variants of NF- $\kappa$ B and risk of liver cancer. All study participants were ethnic Chinese and residents of Shanghai with similar genetic background, which minimized the potential confounding of ethnics. Only incident cases were included which ruled out the possibility of recall and selection bias. Liver cancer cases were carefully verified with multiple approaches which minimized the disease misclassification. Also, we controlled potential confounding variables in the analysis. The limitations of our study should also be noted. Firstly, we focused on only two genes involved in canonical pathway of NF- $\kappa$ B, other regulatory genes in NF- $\kappa$ B signaling pathway may also contribute to the pathogenesis of liver cancer. Secondly, we did not test for HBV infection, HCV infection or aflatoxin exposure, so we cannot rule out the possible confoundings although the presents of HCV infection and aflatoxin are very low in the study population<sup>43,41</sup>, but we did take into consideration of the participants' history of hepatitis and liver cirrhosis. Finally, due

Formatted: Superscript

Formatted: Superscript

Formatted: Superscript



1  
2  
3  
4  
5  
6  
7 to the relatively small sample size, the frequencies of some homozygous variants were  
8 low in subgroups therefore reduced the statistical power and limited us from evaluating  
9 the joint effects in stratified analysis. Replication in other studies is needed.  
10

11 In summary, in this nested case-control study, we provided additional evidence for  
12 a role of NF- $\kappa$ B SNPs and haplotypes in the etiology of liver cancer. Studies in larger,  
13 varied populations are warranted to confirm these findings. Furthermore, functional  
14 studies are required in order to explore the underlying mechanisms.  
15  
16

17  
18 **Acknowledgements** We would like to thank the participants of the Shanghai Men's  
19 Health Study and the Shanghai Women's Health Study for the invaluable contribution to  
20 this work.  
21  
22

23  
24 **Contributors** YBX obtained the funding, developed the research design, drafted the  
25 manuscript, interpreted the results, and also had primary responsibility for the final  
26 content; W Zheng and XOS designed, directed and obtained funding for the parent  
27 cohorts, and contributed to the revisions and interpretation of the results; JG obtained  
28 part of funding, drafted the manuscript, analyzed the data and interpreted the results; JG  
29 and HLX conducted experiments; All authors critically reviewed and approval  
30 manuscript.  
31  
32  
33

34  
35 **Funding** This work was supported by the funds of State Key Project Specialized for  
36 Infectious Diseases of China [No.2008ZX10002-015, No.2012ZX10002008-002 to YB  
37 Xiang]. Part of JG's effort on the study has been supported by research project of  
38 Shanghai Municipal Health Bureau [No.2008208]. The parent cohorts were supported  
39 by the grants (R37 CA070867 to W Zheng and R01 CA82729 to XO Shu) from the US  
40 National Institutes of Health.  
41  
42  
43  
44

45 **Competing interests** None. The funding sponsor had no role in the study design, data  
46 collection, statistical analysis and result interpretation, as well as in the writing of the  
47 report and the decision to submit for publication. The corresponding author had full  
48 access to all data in the study and final responsibility for the decision to submit for  
49 publication.  
50  
51  
52  
53

54 **Study approval** Institutional review board.  
55  
56

**Ethics approval** Vanderbilt University IRB and Shanghai Cancer Institute IRB.

**Provenance and peer review** Not commissioned; externally peer reviewed.

**Data sharing statement** No additional data are available.

#### References:

1. Ferlay J, Shin HR, Bray F, *et al*. GLOBOCAN 2008 v2.0, Cancer Incidence and Mortality Worldwide: IARC CancerBase No. 10 [Internet]. Lyon, France: International Agency for Research on Cancer, 2010. Cited 28 Sep 2013. Available from URL: <http://globocan.iarc.fr>.
2. Gao J, Xie L, Yang WS, *et al*. Risk factors of hepatocellular carcinoma-current status and perspectives. *Asian Pac J Cancer Prev* 2012; 13: 743-52.
3. Schottenfeld D, Fraumeni JF. Cancer epidemiology and prevention. 3rd ed. Oxford: Oxford University Press, 2006.
4. Boyle P, Levin B. World cancer report 2008. Lyon: International Agency for Research on Cancer, 2008.
5. Seitz HK, Stickel F. Molecular mechanisms of alcohol-mediated carcinogenesis. *Nat Rev Cancer* 2007; 7: 599-612.
6. Coussens LM, Werb Z. Inflammation and cancer. *Nature* 2002; 420: 860-7.
7. Arsura M, Cavin LG. Nuclear factor-kappaB and liver carcinogenesis. *Cancer Lett* 2005; 229: 157-69.
8. Pikarsky E, Porat RM, Stein I, *et al*. NF-kappaB functions as a tumour promoter in inflammation-associated cancer. *Nature* 2004; 431: 461-6.
9. He G, Karin M. NF-kappaB and STAT3 - key players in liver inflammation and cancer. *Cell Res* 2011; 21: 159-68.
10. Berasain C, Castillo J, Perugorria MJ, *et al*. Inflammation and liver cancer: new molecular links. *Ann N Y Acad Sci* 2009; 1155: 206-21.
11. Sen R, Baltimore D. Multiple nuclear factors interact with the immunoglobulin enhancer sequences. *Cell* 1986; 46: 705-16.
12. Barnes PJ, Karin M. Nuclear factor-kappaB: a pivotal transcription factor in chronic inflammatory diseases. *N Engl J Med* 1997; 336: 1066-71.
13. Baldwin AJ. Series introduction: the transcription factor NF-kappaB and human disease. *J Clin Invest* 2001; 107: 3-6.
14. Karin M. Nuclear factor-kappaB in cancer development and progression. *Nature* 2006; 441: 431-6.
15. Curran JE, Weinstein SR, Griffiths LR. Polymorphic variants of NFKB1 and its inhibitory protein NFKBIA, and their involvement in sporadic breast cancer. *Cancer Lett* 2002; 188: 103-7.
16. Zhang P, Wei Q, Li X, *et al*. A functional insertion/deletion polymorphism in the promoter region of the NFKB1 gene increases susceptibility for prostate cancer. *Cancer Genet Cytogenet* 2009; 191:

1  
2  
3  
4  
5  
6  
7  
8  
9  
10  
11  
12  
13  
14  
15  
16  
17  
18  
19  
20  
21  
22  
23  
24  
25  
26  
27  
28  
29  
30  
31  
32  
33  
34  
35  
36  
37  
38  
39  
40  
41  
42  
43  
44  
45  
46  
47  
48  
49  
50  
51  
52  
53  
54  
55  
56  
57  
58  
59  
60

73-7.

17. Lo SS, Chen JH, Wu CW, *et al.* Functional polymorphism of NFKB1 promoter may correlate to the susceptibility of gastric cancer in aged patients. *Surgery* 2009; 145: 280-5.

18. Yu Y, Liu H, Jin M, *et al.* The joint association of REST and NFKB1 polymorphisms on the risk of colorectal cancer. *Ann Hum Genet* 2012; 76: 269-76.

19. Lin CW, Hsieh YS, Hsin CH, *et al.* Effects of NFKB1 and NFKBIA gene polymorphisms on susceptibility to environmental factors and the clinicopathologic development of oral cancer. *PLoS One* 2012; 7: e35078.

20. Shu XO, Yang G, Jin F, *et al.* Validity and reproducibility of the food frequency questionnaire used in the Shanghai Women's Health Study. *Eur J Clin Nutr* 2004; 58: 17-23.

21. Zheng W, Chow WH, Yang G, *et al.* The Shanghai Women's Health Study: rationale, study design, and baseline characteristics. *Am J Epidemiol* 2005; 162: 1123-31.

22. Villegas R, Yang G, Liu D, *et al.* Validity and reproducibility of the food-frequency questionnaire used in the Shanghai men's health study. *Br J Nutr* 2007; 97: 993-1000.

23. Cai H, Zheng W, Xiang YB, *et al.* Dietary patterns and their correlates among middle-aged and elderly Chinese men: a report from the Shanghai Men's Health Study. *Br J Nutr* 2007; 98: 1006-13.

24. World Health Organization. International Classification of Diseases, ninth revision (ICD-9). Geneva, Switzerland: World Health Organization, 1977.

25. de Bakker PI, McVean G, Sabeti PC, *et al.* A high-resolution HLA and SNP haplotype map for disease association studies in the extended human MHC. *Nat Genet* 2006; 38: 1166-72.

26. Barrett JC, Fry B, Maller J, *et al.* Haploview: analysis and visualization of LD and haplotype maps. *Bioinformatics* 2005; 21: 263-5.

27. Lin DY, Zeng D, Millikan R. Maximum likelihood estimation of haplotype effects and haplotype-environment interactions in association studies. *Genet Epidemiol* 2005; 29: 299-312.

28. Mathew S, Murty VV, Dalla-Favera R, *et al.* Chromosomal localization of genes encoding the transcription factors, c-rel, NF-kappa Bp50, NF-kappa Bp65, and lyt-10 by fluorescence in situ hybridization. *Oncogene* 1993; 8: 191-3.

29. He Y, Zhang H, Yin J, *et al.* IkappaBalpha gene promoter polymorphisms are associated with hepatocarcinogenesis in patients infected with hepatitis B virus genotype C. *Carcinogenesis* 2009; 30: 1916-22.

30. Cheng CW, Su JL, Lin CW, *et al.* Effects of NFKB1 and NFKBIA gene polymorphisms on hepatocellular carcinoma susceptibility and clinicopathological features. *PLoS One* 2013; 8: e56130.

31. Lin SC, Liu CJ, Yeh WI, *et al.* Functional polymorphism in NFKB1 promoter is related to the risks of oral squamous cell carcinoma occurring on older male areca (betel) chewers. *Cancer Lett* 2006; 243: 47-54.

32. Bu H, Rosdahl I, Sun XF, *et al.* Importance of polymorphisms in NF-kappaB1 and NF-kappaB1alpha genes for melanoma risk, clinicopathological features and tumor progression in Swedish melanoma patients. *J Cancer Res Clin Oncol* 2007; 133: 859-66.

33. Zhou B, Rao L, Li Y, *et al.* A functional insertion/deletion polymorphism in the promoter region of NFKB1 gene increases susceptibility for nasopharyngeal carcinoma. *Cancer Lett* 2009; 275: 72-6.

34. Zhou B, Qie M, Wang Y, *et al.* Relationship between NFKB1 -94 insertion/deletion ATG

1  
2  
3  
4  
5  
6 polymorphism and susceptibility of cervical squamous cell carcinoma risk. *Ann Oncol* 2010; 21:  
7 506-11.

8  
9 35. Lewander A, Butchi AK, Gao J, *et al.* Polymorphism in the promoter region of the NFKB1 gene  
10 increases the risk of sporadic colorectal cancer in Swedish but not in Chinese populations. *Scand J*  
11 *Gastroenterol* 2007; 42: 1332-8.

12 36. Andersen V, Christensen J, Overvad K, *et al.* Polymorphisms in NFkB, PXR, LXR and risk of  
13 colorectal cancer in a prospective study of Danes. *Bmc Cancer* 2010; 10: 484.

14 37. Song S, Chen D, Lu J, *et al.* NFkappaB1 and NFkappaBIA polymorphisms are associated with  
15 increased risk for sporadic colorectal cancer in a southern Chinese population. *PLoS One* 2011; 6:  
16 e21726.

17  
18 38. Edenberg HJ, Xuei X, Wetherill LF, *et al.* Association of NFKB1, which encodes a subunit of the  
19 transcription factor NF-kappaB, with alcohol dependence. *Hum Mol Genet* 2008; 17: 963-70.

20 [39. Lu L, Risch E, Deng Q, \*et al.\* An insulin-like growth factor-II intronic variant affects local DNA  
21 conformation and ovarian cancer survival. \*Carcinogenesis\* 2013;34:2024-30.](#)

22 [40. Lu L, Katsaros D, Mayne ST, \*et al.\* Functional study of risk loci of stem cell-associated gene  
23 lin-28B and associations with disease survival outcomes in epithelial ovarian cancer. \*Carcinogenesis\*  
24 \*2012;33:2119-25.\*](#)

25  
26 [3941.](#) Le Beau MM, Ito C, Cogswell P, *et al.* Chromosomal localization of the genes encoding the  
27 p50/p105 subunits of NF-kappa B (NFKB2) and the I kappa B/MAD-3 (NFKBI) inhibitor of  
28 NF-kappa B to 4q24 and 14q13, respectively. *Genomics* 1992; 14: 529-31.

29  
30 [4042.](#) Gao J, Pfeifer D, He LJ, *et al.* Association of NFKBIA polymorphism with colorectal cancer  
31 risk and prognosis in Swedish and Chinese populations. *Scand J Gastroenterol.* 2007; 42: 345-50.

32  
33 [4143.](#) Yuan JM, Ross RK, Stanczyk FZ, *et al.* A cohort study of serum testosterone and  
34 hepatocellular carcinoma in Shanghai, China. *Int J Cancer* 1995; 63: 491-3.

STROBE Statement—Checklist of items that should be included in reports of *cohort studies*

|                              | Item No | Recommendation                                                                                                                                                                                    | Reported on page # |
|------------------------------|---------|---------------------------------------------------------------------------------------------------------------------------------------------------------------------------------------------------|--------------------|
| Title and abstract           | 1       | (a) Indicate the study's design with a commonly used term in the title or the abstract                                                                                                            | 1-3                |
|                              |         | (b) Provide in the abstract an informative and balanced summary of what was done and what was found                                                                                               | 2, 3               |
| <b>Introduction</b>          |         |                                                                                                                                                                                                   |                    |
| Background/rationale         | 2       | Explain the scientific background and rationale for the investigation being reported                                                                                                              | 3                  |
| Objectives                   | 3       | State specific objectives, including any prespecified hypotheses                                                                                                                                  | 4                  |
| <b>Methods</b>               |         |                                                                                                                                                                                                   |                    |
| Study design                 | 4       | Present key elements of study design early in the paper                                                                                                                                           | 4, 5               |
| Setting                      | 5       | Describe the setting, locations, and relevant dates, including periods of recruitment, exposure, follow-up, and data collection                                                                   | 4, 5               |
| Participants                 | 6       | (a) Give the eligibility criteria, and the sources and methods of selection of participants. Describe methods of follow-up                                                                        | 4, 5               |
|                              |         | (b) For matched studies, give matching criteria and number of exposed and unexposed                                                                                                               | 5                  |
| Variables                    | 7       | Clearly define all outcomes, exposures, predictors, potential confounders, and effect modifiers. Give diagnostic criteria, if applicable                                                          | 4-6                |
| Data sources/<br>measurement | 8*      | For each variable of interest, give sources of data and details of methods of assessment (measurement). Describe comparability of assessment methods if there is more than one group              | 4-6                |
| Bias                         | 9       | Describe any efforts to address potential sources of bias                                                                                                                                         | 4-6                |
| Study size                   | 10      | Explain how the study size was arrived at                                                                                                                                                         | 5                  |
| Quantitative variables       | 11      | Explain how quantitative variables were handled in the analyses. If applicable, describe which groupings were chosen and why                                                                      | 6                  |
| Statistical methods          | 12      | (a) Describe all statistical methods, including those used to control for confounding                                                                                                             | 6                  |
|                              |         | (b) Describe any methods used to examine subgroups and interactions                                                                                                                               | N/A                |
|                              |         | (c) Explain how missing data were addressed                                                                                                                                                       | 9                  |
|                              |         | (d) If applicable, explain how loss to follow-up was addressed                                                                                                                                    | 4-5                |
|                              |         | (e) Describe any sensitivity analyses                                                                                                                                                             | N/A                |
| <b>Results</b>               |         |                                                                                                                                                                                                   |                    |
| Participants                 | 13*     | (a) Report numbers of individuals at each stage of study—eg numbers potentially eligible, examined for eligibility, confirmed eligible, included in the study, completing follow-up, and analysed | 5, 9               |
|                              |         | (b) Give reasons for non-participation at each stage                                                                                                                                              | 4-5                |
|                              |         | (c) Consider use of a flow diagram                                                                                                                                                                | N/A                |
| Descriptive data             | 14*     | (a) Give characteristics of study participants (eg demographic, clinical, social) and information on exposures and potential confounders                                                          | 8, 9               |
|                              |         | (b) Indicate number of participants with missing data for each variable of interest                                                                                                               | 9-12               |
|                              |         | (c) Summarise follow-up time (eg, average and total amount)                                                                                                                                       | 4-5                |
| Outcome data                 | 15*     | Report numbers of outcome events or summary measures over time                                                                                                                                    | 5                  |

|                                                                                                                                                          |                          |    |                                                                                                                                                                                                              |           |
|----------------------------------------------------------------------------------------------------------------------------------------------------------|--------------------------|----|--------------------------------------------------------------------------------------------------------------------------------------------------------------------------------------------------------------|-----------|
| 1<br>2<br>3<br>4<br>5<br>6<br>7<br>8<br>9<br>10                                                                                                          | Main results             | 16 | (a) Give unadjusted estimates and, if applicable, confounder-adjusted estimates and their precision (eg, 95% confidence interval). Make clear which confounders were adjusted for and why they were included | 6,7, 9-12 |
| 11<br>12<br>13                                                                                                                                           |                          |    | (b) Report category boundaries when continuous variables were categorized                                                                                                                                    | 9         |
| 14<br>15<br>16<br>17<br>18<br>19                                                                                                                         |                          |    | (c) If relevant, consider translating estimates of relative risk into absolute risk for a meaningful time period                                                                                             | N/A       |
| 20<br>21<br>22<br>23<br>24                                                                                                                               | Other analyses           | 17 | Report other analyses done—eg analyses of subgroups and interactions, and sensitivity analyses                                                                                                               | 12        |
| 25                                                                                                                                                       | <b>Discussion</b>        |    |                                                                                                                                                                                                              |           |
| 26<br>27<br>28<br>29                                                                                                                                     | Key results              | 18 | Summarise key results with reference to study objectives                                                                                                                                                     | 13-15     |
| 30<br>31<br>32<br>33<br>34                                                                                                                               | Limitations              | 19 | Discuss limitations of the study, taking into account sources of potential bias or imprecision. Discuss both direction and magnitude of any potential bias                                                   | 14-15     |
| 35<br>36<br>37<br>38<br>39<br>40<br>41<br>42<br>43<br>44<br>45<br>46<br>47<br>48<br>49<br>50<br>51<br>52<br>53<br>54<br>55<br>56<br>57<br>58<br>59<br>60 | Interpretation           | 20 | Give a cautious overall interpretation of results considering objectives, limitations, multiplicity of analyses, results from similar studies, and other relevant evidence                                   | 15        |
|                                                                                                                                                          | Generalisability         | 21 | Discuss the generalisability (external validity) of the study results                                                                                                                                        | 13, 14    |
|                                                                                                                                                          | <b>Other information</b> |    |                                                                                                                                                                                                              |           |
|                                                                                                                                                          | Funding                  | 22 | Give the source of funding and the role of the funders for the present study and, if applicable, for the original study on which the present article is based                                                | 15        |

\*Give information separately for cases and controls in case-control studies and, if applicable, for exposed and unexposed groups in cohort and cross-sectional studies.

**Note:** An Explanation and Elaboration article discusses each checklist item and gives methodological background and published examples of transparent reporting. The STROBE checklist is best used in conjunction with this article (freely available on the Web sites of PLoS Medicine at <http://www.plosmedicine.org/>, Annals of Internal Medicine at <http://www.annals.org/>, and Epidemiology at <http://www.epidem.com/>). Information on the STROBE Initiative is available at [www.strobe-statement.org](http://www.strobe-statement.org).



**Genetic polymorphism of NFKB1 and NFKBIA genes and liver cancer risk: a nested case-control study in Shanghai, China**

|                                 |                                                                                                                                                                                                                                                                                                                                                                                                                                                                                                                                                                                                     |
|---------------------------------|-----------------------------------------------------------------------------------------------------------------------------------------------------------------------------------------------------------------------------------------------------------------------------------------------------------------------------------------------------------------------------------------------------------------------------------------------------------------------------------------------------------------------------------------------------------------------------------------------------|
| Journal:                        | <i>BMJ Open</i>                                                                                                                                                                                                                                                                                                                                                                                                                                                                                                                                                                                     |
| Manuscript ID:                  | bmjopen-2013-004427.R2                                                                                                                                                                                                                                                                                                                                                                                                                                                                                                                                                                              |
| Article Type:                   | Research                                                                                                                                                                                                                                                                                                                                                                                                                                                                                                                                                                                            |
| Date Submitted by the Author:   | 27-Jan-2014                                                                                                                                                                                                                                                                                                                                                                                                                                                                                                                                                                                         |
| Complete List of Authors:       | Gao, Jing; Shanghai Cancer Institute, Xu, Hong-Li; Shanghai Cancer Institute, Gao, Shan; The First Affiliated Hospital of Zhengzhou University, Zhang, Wei; Shanghai Cancer Institute, Tan, Yu-Ting; Shanghai Cancer Institute, Rothman, Nat; National Cancer Institute, Purdue, Mark; National Cancer Institute, Gao, Yu-Tang; Shanghai Cancer Institute, Department of Epidemiology Zheng, Wei; Vanderbilt School of Medicine, Department of Medicine Shu, Xiao-Ou; Vanderbilt School of Medicine, Department of Medicine Xiang, Yong-bing; Shanghai Cancer Institute, Department of Epidemiology |
| <b>Primary Subject Heading</b>: | Epidemiology                                                                                                                                                                                                                                                                                                                                                                                                                                                                                                                                                                                        |
| Secondary Subject Heading:      | Oncology, Epidemiology, Gastroenterology and hepatology                                                                                                                                                                                                                                                                                                                                                                                                                                                                                                                                             |
| Keywords:                       | Epidemiology < ONCOLOGY, Hepatobiliary tumours < ONCOLOGY, Cancer genetics < GENETICS, EPIDEMIOLOGY                                                                                                                                                                                                                                                                                                                                                                                                                                                                                                 |
|                                 |                                                                                                                                                                                                                                                                                                                                                                                                                                                                                                                                                                                                     |

SCHOLARONE™  
Manuscripts

1  
2  
3 **Genetic polymorphism of *NFKB1* and *NFKBIA* genes and liver cancer risk: a**  
4 **nested case-control study in Shanghai, China**  
5  
6

7  
8 Jing Gao<sup>1,2</sup>, Hong-Li Xu<sup>2</sup>, Shan Gao<sup>3</sup>, Wei Zhang<sup>2</sup>, Yu-Ting Tan<sup>2</sup>, Nat Rothman<sup>4</sup>,  
9 Mark Purdue<sup>4</sup>, Yu-Tang Gao<sup>2</sup>, Wei Zheng<sup>5</sup>, Xiao-Ou Shu<sup>5</sup>, Yong-Bing Xiang<sup>1,2</sup>  
10

11  
12 **Affiliations:**  
13

- 14 1. State Key Laboratory of Oncogene and Related Genes, Shanghai Cancer Institute,  
15 Renji Hospital, Shanghai Jiaotong University School of Medicine, Shanghai, China.  
16 2. Department of Epidemiology, Shanghai Cancer Institute, Renji Hospital, Shanghai  
17 Jiaotong University School of Medicine, Shanghai, China.  
18 3. Department of Infection Management, The First Affiliated Hospital of Zhengzhou  
19 University, Zhengzhou, China.  
20 4. Division of Cancer Epidemiology and Genetics, National Cancer Institute,  
21 Rockville, USA.  
22 5. Division of Epidemiology, Department of Medicine, Vanderbilt Epidemiology  
23 Center, Vanderbilt-Ingram Cancer Center, Vanderbilt University School of Medicine,  
24 Nashville, USA.  
25  
26  
27  
28

29 **Corresponding author**

30 Prof. Y. B. Xiang,  
31 Shanghai Cancer Institute  
32 Renji Hospital  
33 Shanghai Jiaotong University School of Medicine  
34 No. 25, Lane 2200, Xie Tu Road  
35 Shanghai 200032  
36 P. R. China  
37 Telephone: 86-21-64437002  
38 Fax: 86-21-64046550  
39 E-mail: ybxiang@shsci.org  
40  
41  
42  
43

44 **Key words:** genetic polymorphisms, *NFKB1*, *NFKBIA*, primary liver cancer,  
45 susceptibility  
46  
47

48 **Word count: 2911 (Text)**  
49

50 **Tables: 5**

51 **Figures: 0**

52 **Supplemental tables: 0**  
53  
54  
55  
56  
57  
58  
59  
60



## ABSTRACT

**Objectives:** Genetic variations of NF- $\kappa$ B signaling pathway were found to be associated with inflammatory diseases and several malignancies. However, little is known about NF- $\kappa$ B pathway gene polymorphisms and susceptibility of liver cancer. The aim of this study was to investigate whether genetic variants of *NFKB1* and *NFKBIA* were associated with risk of liver cancer in a Chinese population.

**Design:** The study was designed as a nested case-control study within two prospective cohorts (the Shanghai Women's Health Study, SWHS, 1996–2000 and the Shanghai Men's Health Study, SMHS, 2002–2006).

**Settings:** This population-based study was conducted in urban Shanghai, China.

**Participants:** A total of 217 incident liver cancer cases diagnosed through December 31, 2009 and 427 healthy controls matched by sex, age at baseline ( $\pm 2$  years) and date ( $\pm 30$  days) of sample collection were included in the study.

**Primary and secondary outcome measures:** Genetic polymorphisms of *NFKB1* and *NFKBIA* were determined by TaqMan SNP genotyping assay blindly. OR and its 95% CIs were estimated by unconditional logistic regression model to measure the association between selected SNPs and the risk of liver cancer.

**Results:** After adjusted for potential confounding factors, rs28362491 ins/del or del/del genotypes were associated with higher risk of liver cancer with an adjusted OR of 1.54(95%CI: 1.04-2.28). rs230496 AG and GG genotypes were also noted with higher risk of liver cancer with an adjusted OR of 1.53 (95%CI: 1.03-2.26). Haplotype analysis indicated that carriers of the *NFKB1* GA and AA (rs230525-rs230530) haplotypes had higher risk of liver cancer under additive model. No association was observed between *NFKBIA* variants and risk of live cancer.

**Conclusions:** Our results suggest that genetic variants of *NFKB1* influence liver cancer susceptibility in Chinese population, although replication in other studies is needed.

### Article summary-strengths and limitations of this study

- This study was the first population-based study to evaluate the polymorphic variants of NF- $\kappa$ B and risk of liver cancer.
- Only incident cases from two prospective cohorts were included in the study which ruled out the possibility of recall and selection bias.
- The limitations of the study include relatively small sample size, unmeasured HBV infection, HCV infection and aflatoxin exposure. However, we did take into

1  
2  
3 consideration of the participants' history of hepatitis and liver cirrhosis, and the  
4 presents of HCV infection and aflatoxin are very low in the study population.  
5  
6  
7

## 8 INTRODUCTION

9  
10 Liver cancer is a common disorder worldwide which ranks the 5th and 7th most  
11 common cancer among men and women. It was estimated that more than 80% liver  
12 cancers occur in developing countries and about 54% occur in China<sup>1</sup>. Among the  
13 main risk factors for liver cancer, chronic infections of hepatitis B virus (HBV) and  
14 hepatitis C virus (HCV) are the most important in humans, accounting for more than  
15 70% of liver cancer cases worldwide<sup>2-4</sup>. Liver cirrhosis, heavy alcohol consumption,  
16 exposure to aflatoxin, and diabetes also account for part of liver cancer occurrence<sup>2-4</sup>.  
17  
18  
19  
20

21 Chronic inflammation has been widely accepted to play an important role in  
22 hepatocarcinogenesis. Most of the known risk factors of liver cancer such as HBV,  
23 HCV infection and alcohol drinking can cause persistent inflammatory reaction of the  
24 liver and promote cancer development<sup>5, 6</sup>. However, the molecular and cellular  
25 mechanisms linking inflammation and liver cancer remain unclear. Recent findings  
26 have suggested that NF- $\kappa$ B may play a crucial role in bridging the actions of growth  
27 factors and chronic inflammation to hepatic oncogenesis<sup>7-10</sup>.  
28  
29  
30  
31

32 NF- $\kappa$ B, a collection of dimeric transcription factors, was originally identified as  
33 a nuclear factor bound to the enhancer of the immunoglobulin  $\kappa$ -light chain gene<sup>11</sup>  
34 specific to B cells and presents in all cell types<sup>12</sup>. It is a major transcription regulator  
35 of the immune response, cell adhesion, differentiation, proliferation, and apoptosis<sup>13</sup>.  
36 NF- $\kappa$ B dimers are formed by seven distinct proteins: NF- $\kappa$ B1 (p105 and p50),  
37 NF- $\kappa$ B2 (p100 and p52), RelA (p65), RelB and c-Rel, of which NF- $\kappa$ B p50/RelA is  
38 the most common dimer form<sup>9</sup>. In the resting cell, most NF- $\kappa$ B dimers are inactivated  
39 in the cytoplasm by binding to specific inhibitors-I $\kappa$ B family, of which I $\kappa$ B $\alpha$  is the  
40 most common one. In the classical activation pathway, I $\kappa$ B is phosphorylated and  
41 degraded by I $\kappa$ B kinase complex, and then NF- $\kappa$ B dimers are released and translocate  
42 to the nucleus where they coordinate the transcriptional activation of target genes<sup>14</sup>.  
43 Several genetic variations of NF- $\kappa$ B signaling pathway have been reported to be  
44 associated with cancer risks such as breast<sup>15</sup>, prostate<sup>16</sup>, stomach<sup>17</sup>, colorectum<sup>18</sup> and  
45 mouth<sup>19</sup>. However, little is known about role of genetic polymorphisms of NF- $\kappa$ B  
46 genes and susceptibility of liver cancer.  
47  
48  
49  
50  
51  
52  
53  
54  
55

56 In a population based case-control study nested in two prospective cohorts of the  
57  
58  
59  
60

1  
2  
3  
4  
5  
6  
7  
8  
9  
10  
11  
12  
13  
14  
15  
16  
17  
18  
19  
20  
21  
22  
23  
24  
25  
26  
27  
28  
29  
30  
31  
32  
33  
34  
35  
36  
37  
38  
39  
40  
41  
42  
43  
44  
45  
46  
47  
48  
49  
50  
51  
52  
53  
54  
55  
56  
57  
58  
59  
60

Shanghai Women's and Men's Health Studies, we investigated the relationships between genetic variants of *NFKB1* and *NFKBIA*, two key genes involved in classic signaling pathway of NF- $\kappa$ B, and the risk of liver cancer among Chinese men and women.

## MATERIAL AND METHODS

### Study population

Participants of this study came from the Shanghai Women's Health Study (SWHS) and Shanghai Men's Health Study (SMHS). The design and methods used in these two studies have been described in detail elsewhere<sup>20-23</sup>. Briefly, the SWHS enrolled 74,941 women aged 40-74 years between March 1, 1997 and May 31, 2000, with a response rate of 92.7%. SMHS enrolled 61,491 men aged 40-74 years without history of cancer at recruitment from April 1, 2002 to June 30, 2006, with a response rate of 74.1%. Both studies were approved by the relevant Institutional Review Boards for human research in China and the United States and a written informed consent was obtained from all participants.

In-person interview was conducted by trained interviewers using a structured questionnaire at baseline to obtain information on demographics, lifestyle, dietary habits, medical history and other characteristics. Anthropometric measurements, including current weight, height and circumferences of the waist and hips, were also measured. Of the eligible participants, 56,831 (75.8%) of the SWHS and 46,332 (75.3%) of the SMHS provided a 10-ml blood sample at baseline. The samples were drawn into an EDTA Vacutainer tube and then kept in a portable styrofoam box with ice packs (at approximately 0-4°C) and processed within 6 hours for long-term storage at -70°C. A bio-specimen collection form was completed for each participant at the time of sample procurement which included the date and time of collection, time of last meal, and date of last menstruation, intake of selected foods, smoking, as well as use of any medications over the previous 24 hours and during the previous week.

### Cohort follow-up and outcome ascertainment

Both cohorts were followed for occurrence of cancer and other chronic diseases by active in-person surveys conducted every 2-3 years as well as annual record linkage to the databases of the population-based Shanghai Cancer Registry, Shanghai Vital Statistics Registry, and Shanghai Resident Registry. For the SWHS, four rounds of in-person follow-ups were completed and the response rates for the first

1  
2  
3 (2000-2002), second (2002-2004), third (2004-2007), and fourth (2008-2011)  
4 follow-up surveys were 99.8%, 98.7%, 96.7%, and 92.0%, respectively. For the  
5 SMHS, two rounds of follow-up surveys have completed. The response rates for the  
6 first (2004-2008) and second (2008-2011) follow-up surveys were 97.6% and 93.6%,  
7 respectively. For cohort members who developed liver cancer during the follow-up,  
8 medical chart were reviewed by a panel of oncologists to verify the diagnosis. Liver  
9 cancer data through December 31, 2009 was used for the present study.

10  
11  
12  
13  
14  
15  
16  
17  
18  
19  
20  
21  
22  
23  
24  
25  
26  
27  
28  
29  
30  
31  
32  
33  
34  
35  
36  
37  
38  
39  
40  
41  
42  
43  
44  
45  
46  
47  
48  
49  
50  
51  
52  
53  
54  
55  
56  
57  
58  
59  
60

Included in this nested case-control study are 217 incident liver cancer cases and 427 matched controls who had donated blood sample. Liver cancer cases were defined as having an International Classification of Disease, Ninth Revision (ICD-9), codes of 155.0 (primary malignant neoplasms), 155.1(malignant neoplasms of the intrahepatic bile ducts), or 155.2 (unspecified malignant neoplasms of the liver)<sup>24</sup>. Two control subjects were randomly selected from the cohorts who donated a blood sample at baseline and matched to each case for sex, age at baseline ( $\pm 2$  years) and date ( $\pm 30$  days) of sample collection. All controls were free of any cancer at the time of cancer diagnosis for the corresponding case.

### Genotyping

Single-nucleotide polymorphisms (SNPs) were selected based on both TagSNP and their putative functional significance. Tagging SNPs were selected by searching the Han Chinese data from the Hapmap project<sup>25</sup>. The following criteria were used to identify tagging SNPs: (i) SNPs located in the genes or within the 5-kb flanking region, (ii) a minor allele frequency  $\geq 0.05$ , and (iii) other unselected single-nucleotide polymorphisms could be captured by one of the tagging SNPs with a linkage disequilibrium of  $r^2 \geq 0.90$ . A total of 8 SNPs were selected for genotyping which were rs28362491, rs230530, rs230525, rs230496 for *NFKBI* and rs3138053, rs3138055, rs2273650, rs696 for *NFKBIA* (table 1). Genomic DNA was extracted from buffycoat using Promega DNA Extraction Kit according to the manufacturer's instructions (Promega Corporation, Madison, WI, USA). Genotyping were performed by the TaqMan assay, using the ABI PRISM 7900HT Sequence Detection System (Applied Biosystems, Foster City, CA, USA), in 384-wellformat, with dual fluorescent reporter probes VIC and FAM. rs28362491 was genotyped using custom-designed probes and primers. The primer sequences were: 5'-GCCTCCGTGCTGCCT-3'(forward primer), 3'-AGGGAAGCCCCCAGGAA-5'(reverse primer). The probe sequences were: 5'-TTCCCCGACCATTGG-3' (del),

5'-CCGACCATTGATTGG-3' (ins). Other SNPs were genotyped using pre-designed assays (Applied biosystems). The quality and potential misclassification of the genotyping results were assessed by evaluating 5% of duplicate DNA samples that were randomly selected from the whole samples. There replicates were 100% concordant. All serum samples were tested blindly and were identified only by an unique identification number blinded with case-control status.

Table 1. Descriptions of Genetic Polymorphisms of the *NFKB1* and *NFKBIA* genes under investigation

| Gene          | Assay ID   | Sequence                                                        | Location     |
|---------------|------------|-----------------------------------------------------------------|--------------|
| <i>NFKB1</i>  | rs28362491 | CTCCGTGCTGCCTGCGTTCCCCGACC[-/ATTG]ATTGGGCC<br>CGGCAGGCGCTTCCTGG | 5'-near gene |
|               | rs230530   | TTTTTAGCACCAAACATCTTAATTT[A/G]CATTCAAATAAA<br>TGAGAACCACCAT     | intron       |
|               | rs230525   | TACGGGAAAAGTGATTCTTGTTTAC[A/G]GAGCCCTCTTT<br>CACAGTTTCATGTT     | intron       |
|               | rs230496   | TGTCTGGATTGCTTGAGACAGCCC[A/G]GTTTGCCCCTG<br>ACCTAATTGTTTAT      | intron       |
| <i>NFKBIA</i> | rs3138053  | ATTCGTTTATGCTATCTGACCTACA[C/T]TGTGCTCCCGCA<br>GAAAAAGGATCGT     | 5'-near gene |
|               | rs3138055  | AATCAACGGGATGACAGAATGACAA[C/T]GGAGAGGTCT<br>CCAACCACAGGCCAA     | 3'-near gene |
|               | rs2273650  | AACAATACATTATGTACACCATTTA[C/T]AGGAGGGTAAC<br>ACAAACCTTGACAG     | 3'-UTR       |
|               | rs696      | CCTACCACAATAAGACGTTTTGGGC[C/T]AGGCAGTGTGC<br>AGTGTGGATATAAG     | 3'-UTR       |

### Statistical analysis

Subjects with both survey data and genotyping results were included in the final analysis. Means and percentages of selected characteristics for cases and controls were calculated. The distributions of selected characteristics were compared between cases and controls by either student's *t*-test (continuous variables) or  $\chi^2$  test (categorical variables). Odds ratio and its 95% confidence interval were estimated by unconditional logistic regression model to measure the association between selected SNPs and the risk of primary liver cancer. In the multivariable analysis, potential confounding factors were adjusted for, which include age (continuous variable); education level (four categories: elementary school or less, middle school, high school, and college or above); history of hepatitis (yes or no); family history of liver cancer (yes or no); and history of other chronic liver diseases or cirrhosis (yes or no). Statistical analyses were carried out using the SAS software package (version 9.2; SAS Institute, Cary, NC). Tests for trend were performed by entering categorical

1  
2  
3 variables as continuous variables in the regression model. All P values were calculated  
4 by two-sided tests and were considered statistically significant if P was less than 0.05.  
5  
6

7 Hardy–Weinberg equilibrium and Linkage disequilibrium were assessed with  
8 HaploView version 4.0<sup>26</sup>. Associations between haplotypes and the risk of liver cancer  
9 were evaluated with HAPSTAT version 3.0 using the most common haplotype as the  
10 referent category, assuming an additive model<sup>27</sup>.  
11  
12  
13  
14  
15  
16  
17  
18  
19  
20  
21  
22  
23  
24  
25  
26  
27  
28  
29  
30  
31  
32  
33  
34  
35  
36  
37  
38  
39  
40  
41  
42  
43  
44  
45  
46  
47  
48  
49  
50  
51  
52  
53  
54  
55  
56  
57  
58  
59  
60

For peer review only

## RESULTS

Selected baseline characteristics of study participants were presented in table 2. The average ages of cases and control were 59.61 and 59.47. Compared with controls, liver cancer cases were more likely to have a lower education level, a history of hepatitis, a family history of liver cancer in first degree relatives, and history of chronic liver diseases or cirrhosis. Besides, male liver cancer cases were more probably to have lower body mass index, and be a non-regular exerciser compared to controls, although the difference were at borderline significance. Whereas in women, cases were more likely to have a history of type 2 diabetes than controls. No differences were observed in family income, smoking, drinking habits, waist to hip ratio, and family history of other cancers between the two groups.

The associations of *NFKB1* SNPs with liver cancer risk were summarized in table 3. The genotypes of rs28362491, rs230530 and rs230525 showed no deviation from Hardy-Weinberg equilibrium in controls except for rs230496. After adjusted for potential confounding factors, rs28362191 ins/del or del/del genotypes were associated with higher risk of liver cancer with an OR of 1.54(95%CI: 1.04-2.28). rs230496 AG and GG genotypes were also noted with higher risk of liver cancer with an adjusted OR of 1.53 (95%CI: 1.03-2.26). Carriers of rs230525 AG or GG genotypes had about 30% percent increased risk of liver cancer, but the risk was not insignificant. No association was found between rs230530 and liver cancer risk.

Table 4 presents the distribution of *NFKB1A* SNPs in cases and controls. The genotypes of rs3138055, rs696 and rs2273650 showed no deviation from Hardy-Weinberg equilibrium in controls but for rs3138053. Generally, all the four SNPs showed no relationship with liver cancer.

We further analyzed the haplotypes of these SNPs with risk of liver cancer (table 5). For *NFKB1* gene, two SNPs (rs230525, rs230530) demonstrated strong linkage disequilibrium ( $D' = 1.0$ ,  $r^2 = 0.59$ ). Compared to men carrying rs230525-rs230530 AG haplotype, those with GA or AA haplotypes were at increased risk of liver cancer with ORs of 1.46(95%CI: 1.05-2.03) and 1.81(95%CI: 1.15-2.86) in significance, respectively. For *NFKB1A*, rs3138053 and rs2273650 were in linkage disequilibrium ( $D' = 0.97$ ,  $r^2 = 0.31$ ) but none of the haplotypes was significantly associated with liver cancer.



Table 2. Distribution of selected characteristics in the study cases and controls<sup>†</sup>

| Characteristics                              | All subjects  |                  |        | Male          |                  |        | Female       |                  |        |
|----------------------------------------------|---------------|------------------|--------|---------------|------------------|--------|--------------|------------------|--------|
|                                              | Cases (N=217) | Controls (N=427) | P      | Cases (N=131) | Controls (N=262) | P      | Cases (N=86) | Controls (N=165) | P      |
| Age at interview, Mean±SD,                   | 59.61±9.56    | 59.47±9.55       | 0.853  | 60.05±9.93    | 59.86±9.95       | 0.858  | 58.95±8.98   | 58.85±8.87       | 0.928  |
| Education level (%)                          |               |                  |        |               |                  |        |              |                  |        |
| Elementary school or less                    | 63(29.30)     | 115(27.00)       |        | 18(13.95)     | 35(13.41)        |        | 45(52.33)    | 80(48.48)        |        |
| Middle school                                | 69(32.09)     | 148(37.74)       |        | 54(41.86)     | 104(39.85)       |        | 15(17.44)    | 44(26.67)        |        |
| High school                                  | 62(28.84)     | 91(21.36)        |        | 41(31.78)     | 61(23.37)        |        | 21(24.42)    | 30(18.18)        |        |
| College or above                             | 21(9.77)      | 72(16.90)        | 0.031  | 16(12.40)     | 61(23.37)        | 0.053  | 5(5.81)      | 11(6.67)         | 0.341  |
| Family income (%) <sup>†</sup>               |               |                  |        |               |                  |        |              |                  |        |
| Low                                          | 50(23.04)     | 90(21.13)        |        | 17(12.98)     | 37(14.12)        |        | 33(38.37)    | 53(32.32)        |        |
| Medium                                       | 112(51.61)    | 208(48.83)       |        | 76(58.02)     | 130(49.62)       |        | 36(41.86)    | 78(47.56)        |        |
| High                                         | 55(25.35)     | 128(30.05)       | 0.454  | 38(29.01)     | 95(36.26)        | 0.271  | 17(19.77)    | 33(20.12)        | 0.606  |
| Ever smoked (%)                              | 93(42.86)     | 173(40.52)       | 0.569  | 90(68.70)     | 163(62.21)       | 0.206  | 3(3.49)      | 10(6.06)         | 0.384  |
| Ever drank alcohol (%)                       | 45(20.74)     | 98(22.95)        | 0.523  | 42(32.06)     | 97(37.02)        | 0.333  | 3(3.49)      | 1(0.61)          | 0.084  |
| Body mass index ,kg/m <sup>2</sup> , Mean±SD | 23.79±3.65    | 24.16±3.31       | 0.198  | 23.16±3.25    | 23.77±2.89       | 0.06   | 24.75±4.02   | 24.78±3.80       | 0.961  |
| WHR, Mean±SD                                 | 0.87±0.07     | 0.87±0.07        | 0.936  | 0.90±0.06     | 0.90±0.06        | 0.379  | 0.82±0.05    | 0.83±0.06        | 0.261  |
| Regular physical activity (%)                | 94(43.32)     | 207(48.48)       | 0.215  | 49(37.40)     | 124(47.33)       | 0.062  | 45(52.33)    | 83(50.30)        | 0.761  |
| physical activity, MET-hours/week            | 81.58±47.12   | 83.71±43.59      | 0.570  | 66.86±40.33   | 68.00±34.61      | 0.78   | 104.00±48.09 | 108.60±44.83     | 0.450  |
| History of hepatitis (%)                     | 74(34.10)     | 25(5.85)         | <0.001 | 57(43.51)     | 16(6.11)         | <0.001 | 17(19.77)    | 9(9.45)          | <0.001 |
| Family history of cancer (%)                 | 69(31.80)     | 116(27.17)       | 0.220  | 41(31.30)     | 70(26.72)        | 0.342  | 28(32.56)    | 46(27.88)        | 0.441  |
| Family history of liver cancer (%)           | 28(12.90)     | 18(4.22)         | <0.001 | 20(15.27)     | 10(3.82)         | <0.001 | 8(9.30)      | 8(4.85)          | 0.171  |
| History of type 2 diabetes (%)               | 25(11.52)     | 35(8.20)         | 0.171  | 14(10.69)     | 25(9.54)         | 0.72   | 11(12.79)    | 10(6.06)         | 0.068  |
| History of chronic liver disease or          | 35(16.13)     | 11(2.58)         | <0.001 | 26(19.85)     | 10(3.82)         | <0.001 | 9(10.47)     | 1(0.61)          | <0.001 |

\* Missing data was excluded from the analysis

<sup>†</sup> Family income level (low income for <5000 yuan/year in the SWHS and <12 000 yuan/year in the SMHS; medium income for 5000 to <10 000 yuan/year in the SWHS and 12 000 to <24 000 yuan/year in the SMHS; and high income for >10 000 yuan/year in the SWHS and >24 000 yuan/year in the SMHS)



Table 3. *NFKB1* genetic polymorphisms with the risk of primary liver cancer

| SNPs               | Cases | Controls | P for $\chi^2$ | OR*   | 95%CI     | OR <sup>†</sup> | 95%CI     | OR <sup>‡</sup> | 95%CI     |
|--------------------|-------|----------|----------------|-------|-----------|-----------------|-----------|-----------------|-----------|
| rs28362491         |       |          |                |       |           |                 |           |                 |           |
| ins/ins            | 68    | 171      |                | 1.00  | -         | 1.00            | -         | 1.00            | -         |
| ins/del            | 102   | 160      |                | 1.60  | 1.10-2.33 | 1.60            | 1.10-2.33 | 1.71            | 1.13-2.60 |
| del/del            | 40    | 79       | 0.047          | 1.27  | 0.79-2.05 | 1.27            | 0.79-2.04 | 1.21            | 0.71-2.05 |
| <i>P for trend</i> |       |          |                | 0.144 |           | 0.146           |           | 0.233           |           |
| ins/del or del/del | 142   | 239      | 0.023          | 1.50  | 1.05-2.12 | 1.49            | 1.05-2.12 | 1.54            | 1.04-2.28 |
| rs230496           |       |          |                |       |           |                 |           |                 |           |
| AA                 | 64    | 164      |                | 1.00  | -         | 1.00            | -         | 1.00            | -         |
| AG                 | 101   | 169      |                | 1.53  | 1.05-2.24 | 1.53            | 1.05-2.24 | 1.68            | 1.10-2.58 |
| GG                 | 47    | 91       | 0.087          | 1.33  | 0.84-2.09 | 1.32            | 0.84-2.09 | 1.25            | 0.75-2.09 |
| <i>P for trend</i> |       |          |                | 0.141 |           | 0.143           |           | 0.235           |           |
| AG or GG           | 148   | 260      | 0.041          | 1.46  | 1.03-2.08 | 1.46            | 1.03-2.08 | 1.53            | 1.03-2.26 |
| rs230525           |       |          |                |       |           |                 |           |                 |           |
| AA                 | 79    | 186      |                | 1.00  | -         | 1.00            | -         | 1.00            | -         |
| AG                 | 102   | 175      |                | 1.38  | 0.96-1.97 | 1.38            | 0.96-1.98 | 1.46            | 0.98-2.18 |
| GG                 | 32    | 63       | 0.224          | 1.20  | 0.73-1.98 | 1.20            | 0.73-1.97 | 1.11            | 0.63-1.94 |
| <i>P for trend</i> |       |          |                | 0.236 |           | 0.236           |           | 0.347           |           |
| AG or GG           | 134   | 238      | 0.100          | 1.33  | 0.95-1.87 | 1.33            | 0.95-1.87 | 1.36            | 0.94-1.99 |
| rs230530           |       |          |                |       |           |                 |           |                 |           |
| AA                 | 64    | 114      |                | 1.00  | -         | 1.00            | -         | 1.00            | -         |
| AG                 | 99    | 175      |                | 1.01  | 0.68-1.49 | 1.01            | 0.68-1.49 | 1.05            | 0.68-1.62 |
| GG                 | 48    | 129      | 0.102          | 0.66  | 0.42-1.04 | 0.66            | 0.42-1.04 | 0.67            | 0.40-1.12 |
| <i>P for trend</i> |       |          |                | 0.079 |           | 0.078           |           | 0.132           |           |
| AG or GG           | 147   | 304      | 0.423          | 0.86  | 0.60-1.24 | 0.86            | 0.60-1.24 | 0.89            | 0.59-1.34 |

\*Adjusted for age

<sup>†</sup>Adjusted for age, sex.<sup>‡</sup>Adjusted for age, sex, education level, family history of liver cancer, history of hepatitis, and chronic liver diseases or cirrhosis.

Table 4. *NFKB1A* genetic polymorphisms with the risk of primary liver cancer

| SNPs               | Cases | Controls | P     | OR*   | OR <sup>†</sup> | OR <sup>‡</sup> | OR <sup>‡</sup> | OR <sup>‡</sup> | OR <sup>‡</sup> |
|--------------------|-------|----------|-------|-------|-----------------|-----------------|-----------------|-----------------|-----------------|
| rs3138053          |       |          |       |       |                 |                 |                 |                 |                 |
| AA                 | 173   | 336      |       | 1.00  | -               | 1.00            | -               | 1.00            | -               |
| AG                 | 21    | 48       |       | 0.85  | 0.49-1.47       | 0.84            | 0.48-1.45       | 0.97            | 0.54-1.74       |
| GG                 | 19    | 40       | 0.823 | 0.92  | 0.52-1.64       | 0.94            | 0.52-1.68       | 0.98            | 0.51-1.88       |
| <i>P for trend</i> |       |          |       | 0.638 |                 | 0.653           |                 | 0.920           |                 |
| AG or GG           | 40    | 88       | 0.556 | 0.88  | 0.58-1.34       | 0.88            | 0.58-1.34       | 0.97            | 0.61-1.54       |
| rs3138055          |       |          |       |       |                 |                 |                 |                 |                 |
| CC                 | 62    | 128      |       | 1.00  | -               | 1.00            | -               | 1.00            | -               |
| CT                 | 109   | 215      |       | 1.05  | 0.72-1.54       | 1.05            | 0.72-1.54       | 1.22            | 0.79-1.87       |
| TT                 | 42    | 81       | 0.956 | 1.07  | 0.66-1.73       | 1.07            | 0.66-1.73       | 1.33            | 0.78-2.27       |
| <i>P for trend</i> |       |          |       | 0.772 |                 | 0.771           |                 | 0.276           |                 |
| CT or TT           | 151   | 296      | 0.778 | 1.06  | 0.74-1.51       | 1.06            | 0.74-1.52       | 1.25            | 0.83-1.88       |
| rs696              |       |          |       |       |                 |                 |                 |                 |                 |
| CC                 | 65    | 149      |       | 1.00  | -               | 1.00            | -               | 1.00            | -               |
| CT                 | 115   | 196      |       | 1.35  | 0.93-1.96       | 1.35            | 0.93-1.96       | 1.47            | 0.97-2.23       |
| TT                 | 33    | 76       | 0.210 | 0.99  | 0.60-1.64       | 0.99            | 0.60-1.64       | 1.17            | 0.67-2.03       |
| <i>P for trend</i> |       |          |       | 0.694 |                 | 0.695           |                 | 0.360           |                 |
| CT or TT           | 148   | 272      | 0.218 | 1.25  | 0.88-1.78       | 1.25            | 0.88-1.78       | 1.38            | 0.93-2.06       |
| rs2273650          |       |          |       |       |                 |                 |                 |                 |                 |
| CC                 | 108   | 215      |       | 1.00  | -               | 1.00            | -               | 1.00            | -               |
| CT                 | 84    | 173      |       | 0.97  | 0.68-1.37       | 0.97            | 0.68-1.37       | 0.86            | 0.58-1.26       |
| TT                 | 20    | 37       | 0.938 | 1.08  | 0.60-1.95       | 1.07            | 0.59-1.94       | 0.89            | 0.45-1.73       |
| <i>P for trend</i> |       |          |       | 0.937 |                 | 0.945           |                 | 0.493           |                 |
| CT or TT           | 104   | 210      | 0.933 | 0.99  | 0.71-1.38       | 0.99            | 0.71-1.37       | 0.86            | 0.60-1.24       |

\*Adjusted for age

† Adjusted for age, sex.

‡ Adjusted for age, sex, education level, family history of liver cancer, history of hepatitis, and chronic liver diseases or cirrhosis.

Table 5. ORs and 95% CIs for liver cancer in relation to *NFKB1/NFKB1A* haplotypes

|                                     | All subjects* |          |                 | Female† |          |                 | Male† |          |                 |
|-------------------------------------|---------------|----------|-----------------|---------|----------|-----------------|-------|----------|-----------------|
|                                     | Cases         | Controls | OR              | Cases   | Controls | OR              | Cases | Controls | OR              |
|                                     | (%)           | (%)      |                 | (%)     | (%)      |                 | (%)   | (%)      |                 |
| <i>NFKB1</i> (rs230525-rs230530)    | n=215         | n=425    |                 | n=86    | n=165    |                 | n=129 | n=260    |                 |
| AG                                  | 46.49         | 52.01    | ref             | 52.14   | 49.39    | ref             | 42.69 | 53.53    | ref             |
| GA                                  | 38.973        | 35.50    | 1.23(0.95-1.58) | 36.47   | 36.59    | 0.94(0.63-1.41) | 40.55 | 34.88    | 1.46(1.05-2.03) |
| AA                                  | 14.54         | 12.49    | 1.30(0.91-1.86) | 11.39   | 14.02    | 0.77(0.42-1.39) | 16.76 | 11.59    | 1.81(1.15-2.86) |
| <i>NFKB1A</i> (rs3138055-rs2273650) |               |          |                 |         |          |                 |       |          |                 |
| TC                                  | 45.00         | 43.94    | ref             | 48.24   | 42.31    | ref             | 43.15 | 45.14    | ref             |
| CT                                  | 29.05         | 28.58    | 1.00(0.75-1.31) | 31.30   | 31.21    | 0.88(0.57-1.35) | 27.79 | 27.12    | 1.07(0.75-1.55) |
| CC                                  | 25.65         | 27.00    | 0.93(0.70-1.24) | 20.47   | 26.48    | 0.68(0.42-1.10) | 28.50 | 26.95    | 1.11(0.77-1.60) |

\* Adjusted for age and sex.

† Adjusted for age

## DISCUSSION

In this nested case-control study, we found that the variants of rs28362491 and rs230496 of *NFKB1* gene might be associated with risk of primary liver cancer. After adjusting for possible confounders, rs28362491 deletion allele and rs230496 AG or GG genotypes were found to increase the risk of liver cancer. In addition, haplotype analysis indicated that carriers of the *NFKB1* GA and AA (rs230525-rs230530) haplotypes had higher risk of liver cancer under additive model, although this association was only observed in man. These findings suggested that variants of NF- $\kappa$ B signaling pathway may play a role in liver cancer susceptibility.

*NFKB1* gene was mapped on chromosome 4q23-q24 and composed of 24 exons<sup>28</sup>. This gene encodes p105 which is a non-DNA binding protein. As an inactive precursor, it was activated to p50, a DNA binding protein by proteasome-mediated degradation. Several genetic polymorphisms were defined in *NFKB1* and researches have been focused on a common polymorphism of -94 del/ins (rs28362491) in the promoter region. Recent studies showed that genetic polymorphism of rs28362491 was associated with a number of cancer risks including sporadic breast cancer<sup>15</sup>, prostate cancer<sup>16</sup>, gastric cancer<sup>17</sup>, colorectal cancer<sup>18</sup>, and oral cancer<sup>19</sup>, but little is known about its relationship with liver cancer. He and his colleagues conducted a case-control study of 202 HCC cases of HBV carrier and 404 healthy controls without HBV infection. Results showed that after adjusting for age and gender, -94 ins/del and ins/ins genotypes might increase the risk of HCC, with ORs of 1.60 (95%CI:1.01-2.53) and 3.01 (95%CI:1.87-4.85), respectively<sup>29</sup>. A report from Taiwan also found ins allele more prevalent in HCC patients (OR=2.23,95%CI:1.32-3.77)<sup>30</sup>. In our study, we found that ins/del and del/del genotypes were more prevalent in liver cancer cases than controls. It was observed that the association of rs28362491 polymorphism with cancer susceptibility varied with cancer site and study populations. Ins allele was reported to increase the risk of oral cancer<sup>31</sup>, melanoma<sup>32</sup>, prostate cancer<sup>16</sup>, gastric cancer<sup>17</sup>, nasopharyngeal carcinoma<sup>33</sup> and cervical cancer<sup>34</sup>. Two studies in European found del allele might increase the risk of colorectal cancer<sup>35,36</sup>, while in Chinese population, none or even reverse association were obtained<sup>35,37</sup>. The difference of polymorphisms may probably result from interactions or combined effects with none genetic risk factors. Well-designed studies with larger sample size are needed to validate these findings.

To our knowledge, this is the first report on the variants of rs230496, rs230525 and rs230530 with liver cancer susceptibility. A study in European American descent found

1  
2  
3  
4  
5  
6  
7  
8  
9  
10  
11  
12  
13  
14  
15  
16  
17  
18  
19  
20  
21  
22  
23  
24  
25  
26  
27  
28  
29  
30  
31  
32  
33  
34  
35  
36  
37  
38  
39  
40  
41  
42  
43  
44  
45  
46  
47  
48  
49  
50  
51  
52  
53  
54  
55  
56  
57  
58  
59  
60

rs230530 polymorphism associated with alcohol dependence, and the evidence came primarily from those individuals who met criteria for alcoholism earlier<sup>38</sup>. As alcohol is one of the major risk factors of liver cancer, rs230530 might play a role in alcohol associated liver cancer. Unfortunately, subject to the limitation of relatively small sample size, we were not able to explore this issue. In addition, although the functions of intronic SNPs are still obscure, studies have indicated that they can affect either local DNA or RNA secondary structure, thereby regulating gene expression<sup>39,40</sup>

*NFKBIA* gene, which encodes I $\kappa$ B $\alpha$ , the inhibitor of *NFKB1*, was mapped to 14q13 with six exons spanning approximately 3.5kb<sup>41</sup>. As a major component of I $\kappa$ B family, the dysfunction or down regulation of I $\kappa$ B $\alpha$  will lead to over activation of NF- $\kappa$ B. Epidemiological studies on *NFKBIA* were relatively rare. A 2758G/A polymorphism (rs696) in 3' untranslated region might regulate the expression of I $\kappa$ B $\alpha$  and thus affect the activation of NF- $\kappa$ B. Sun et al. found the frequency of AG genotype was increased in Chinese patients  $\geq 50$  years of age (OR=3.06, 95% CI:1.55-6.02) with colorectal cancer<sup>42</sup>. Another study on breast cancer failed to obtain a significant association<sup>15</sup>. There was no previous report on rs696 and risk of liver cancer.

Of the four SNPs of *NFKBIA* gene evaluated, we did not observe a significant association. In previous studies, rs3138053 variant was found to be associated with hepatocellular carcinoma in a Chinese mainland population<sup>29</sup> but not Taiwanese<sup>30</sup>.

There are several strengths of our study. This study was based on two well-designed prospective cohort studies. To the best of our knowledge, it was the first population based study to evaluate the polymorphic variants of NF- $\kappa$ B and risk of liver cancer. All study participants were ethnic Chinese and residents of Shanghai with similar genetic background, which minimized the potential confounding of ethnics. Only incident cases were included which ruled out the possibility of recall and selection bias. Liver cancer cases were carefully verified with multiple approaches which minimized the disease misclassification. Also, we controlled potential confounding variables in the analysis. The limitations of our study should also be noted. Firstly, we focused on only two genes involved in canonical pathway of NF- $\kappa$ B, other regulatory genes in NF- $\kappa$ B signaling pathway may also contribute to the pathogenesis of liver cancer. Secondly, we did not test for HBV infection, HCV infection or aflatoxin exposure, so we cannot rule out the possible confoundings although the presence of HCV infection and aflatoxin are very low in the study population<sup>43</sup>, but we did take into consideration of the participants' history of hepatitis and liver cirrhosis. Finally, due to

1  
2  
3 the relatively small sample size, the frequencies of some homozygous variants were low  
4 in subgroups therefore reduced the statistical power and limited us from evaluating the  
5 joint effects in stratified analysis. Replication in other studies is needed.  
6  
7

8 In summary, in this nested case-control study, we provided additional evidence for  
9 a role of NF- $\kappa$ B SNPs and haplotypes in the etiology of liver cancer. Studies in larger,  
10 varied populations are warranted to confirm these findings. Furthermore, functional  
11 studies are required in order to explore the underlying mechanisms.  
12  
13

14  
15  
16 **Acknowledgements** We would like to thank the participants of the Shanghai Men's  
17 Health Study and the Shanghai Women's Health Study for the invaluable contribution to  
18 this work.  
19  
20

21  
22  
23 **Contributors** YBX obtained the funding, developed the research design, drafted the  
24 manuscript, interpreted the results, and also had primary responsibility for the final  
25 content; W Zheng and XOS designed, directed and obtained funding for the parent  
26 cohorts, and contributed to the revisions and interpretation of the results; JG obtained  
27 part of funding, drafted the manuscript, analyzed the data and interpreted the results; JG  
28 and HLX conducted experiments; All authors critically reviewed and approval  
29 manuscript.  
30  
31  
32  
33

34  
35  
36 **Funding** This work was supported by the funds of State Key Project Specialized for  
37 Infectious Diseases of China [No.2008ZX10002-015, No.2012ZX10002008-002 to YB  
38 Xiang]. Part of JG's effort on the study has been supported by research project of  
39 Shanghai Municipal Health Bureau [No.2008208]. The parent cohorts were supported  
40 by the grants (R37 CA070867 to W Zheng and R01 CA82729 to XO Shu) from the US  
41 National Institutes of Health.  
42  
43  
44

45  
46  
47 **Competing interests** None. The funding sponsor had no role in the study design, data  
48 collection, statistical analysis and result interpretation, as well as in the writing of the  
49 report and the decision to submit for publication. The corresponding author had full  
50 access to all data in the study and final responsibility for the decision to submit for  
51 publication.  
52  
53  
54  
55

56  
57  
58 **Study approval** Institutional review board.  
59  
60

**Ethics approval** Vanderbilt University IRB and Shanghai Cancer Institute IRB.

**Provenance and peer review** Not commissioned; externally peer reviewed.

**Data sharing statement** No additional data are available.

## References:

1. Ferlay J, Shin HR, Bray F, *et al*. GLOBOCAN 2008 v2.0, Cancer Incidence and Mortality Worldwide: IARC CancerBase No. 10 [Internet]. Lyon, France: International Agency for Research on Cancer, 2010. Cited 28 Sep 2013. Available from URL: <http://globocan.iarc.fr>.
2. Gao J, Xie L, Yang WS, *et al*. Risk factors of hepatocellular carcinoma-current status and perspectives. *Asian Pac J Cancer Prev* 2012; 13: 743-52.
3. Schottenfeld D, Fraumeni JF. Cancer epidemiology and prevention. 3rd ed. Oxford: Oxford University Press, 2006.
4. Boyle P, Levin B. World cancer report 2008. Lyon: International Agency for Research on Cancer, 2008.
5. Seitz HK, Stickel F. Molecular mechanisms of alcohol-mediated carcinogenesis. *Nat Rev Cancer* 2007; 7: 599-612.
6. Coussens LM, Werb Z. Inflammation and cancer. *Nature* 2002; 420: 860-7.
7. Arsur M, Cavin LG. Nuclear factor-kappaB and liver carcinogenesis. *Cancer Lett* 2005; 229: 157-69.
8. Pikarsky E, Porat RM, Stein I, *et al*. NF-kappaB functions as a tumour promoter in inflammation-associated cancer. *Nature* 2004; 431: 461-6.
9. He G, Karin M. NF-kappaB and STAT3 - key players in liver inflammation and cancer. *Cell Res* 2011; 21: 159-68.
10. Berasain C, Castillo J, Perugorria MJ, *et al*. Inflammation and liver cancer: new molecular links. *Ann NY Acad Sci* 2009; 1155: 206-21.
11. Sen R, Baltimore D. Multiple nuclear factors interact with the immunoglobulin enhancer sequences. *Cell* 1986; 46: 705-16.
12. Barnes PJ, Karin M. Nuclear factor-kappaB: a pivotal transcription factor in chronic inflammatory diseases. *N Engl J Med* 1997; 336: 1066-71.
13. Baldwin AJ. Series introduction: the transcription factor NF-kappaB and human disease. *J Clin Invest* 2001; 107: 3-6.
14. Karin M. Nuclear factor-kappaB in cancer development and progression. *Nature* 2006; 441: 431-6.
15. Curran JE, Weinstein SR, Griffiths LR. Polymorphic variants of NFKB1 and its inhibitory protein NFKBIA, and their involvement in sporadic breast cancer. *Cancer Lett* 2002; 188: 103-7.
16. Zhang P, Wei Q, Li X, *et al*. A functional insertion/deletion polymorphism in the promoter region of the NFKB1 gene increases susceptibility for prostate cancer. *Cancer Genet Cytogenet* 2009; 191:



73-7.

17. Lo SS, Chen JH, Wu CW, *et al.* Functional polymorphism of NFKB1 promoter may correlate to the susceptibility of gastric cancer in aged patients. *Surgery* 2009; 145: 280-5.

18. Yu Y, Liu H, Jin M, *et al.* The joint association of REST and NFKB1 polymorphisms on the risk of colorectal cancer. *Ann Hum Genet* 2012; 76: 269-76.

19. Lin CW, Hsieh YS, Hsin CH, *et al.* Effects of NFKB1 and NFKBIA gene polymorphisms on susceptibility to environmental factors and the clinicopathologic development of oral cancer. *PLoS One* 2012; 7: e35078.

20. Shu XO, Yang G, Jin F, *et al.* Validity and reproducibility of the food frequency questionnaire used in the Shanghai Women's Health Study. *Eur J Clin Nutr* 2004; 58: 17-23.

21. Zheng W, Chow WH, Yang G, *et al.* The Shanghai Women's Health Study: rationale, study design, and baseline characteristics. *Am J Epidemiol* 2005; 162: 1123-31.

22. Villegas R, Yang G, Liu D, *et al.* Validity and reproducibility of the food-frequency questionnaire used in the Shanghai men's health study. *Br J Nutr* 2007; 97: 993-1000.

23. Cai H, Zheng W, Xiang YB, *et al.* Dietary patterns and their correlates among middle-aged and elderly Chinese men: a report from the Shanghai Men's Health Study. *Br J Nutr* 2007; 98: 1006-13.

24. World Health Organization. International Classification of Diseases, ninth revision (ICD-9). Geneva, Switzerland: World Health Organization, 1977.

25. de Bakker PI, McVean G, Sabeti PC, *et al.* A high-resolution HLA and SNP haplotype map for disease association studies in the extended human MHC. *Nat Genet* 2006; 38: 1166-72.

26. Barrett JC, Fry B, Maller J, *et al.* Haploview: analysis and visualization of LD and haplotype maps. *Bioinformatics* 2005; 21: 263-5.

27. Lin DY, Zeng D, Millikan R. Maximum likelihood estimation of haplotype effects and haplotype-environment interactions in association studies. *Genet Epidemiol* 2005; 29: 299-312.

28. Mathew S, Murty VV, Dalla-Favera R, *et al.* Chromosomal localization of genes encoding the transcription factors, c-rel, NF-kappa Bp50, NF-kappa Bp65, and Iy-10 by fluorescence in situ hybridization. *Oncogene* 1993; 8: 191-3.

29. He Y, Zhang H, Yin J, *et al.* IkappaBalpha gene promoter polymorphisms are associated with hepatocarcinogenesis in patients infected with hepatitis B virus genotype C. *Carcinogenesis* 2009; 30: 1916-22.

30. Cheng CW, Su JL, Lin CW, *et al.* Effects of NFKB1 and NFKBIA gene polymorphisms on hepatocellular carcinoma susceptibility and clinicopathological features. *PLoS One* 2013; 8: e56130.

31. Lin SC, Liu CJ, Yeh WI, *et al.* Functional polymorphism in NFKB1 promoter is related to the risks of oral squamous cell carcinoma occurring on older male areca (betel) chewers. *Cancer Lett* 2006; 243: 47-54.

32. Bu H, Rosdahl I, Sun XF, *et al.* Importance of polymorphisms in NF-kappaB1 and NF-kappaB1alpha genes for melanoma risk, clinicopathological features and tumor progression in Swedish melanoma patients. *J Cancer Res Clin Oncol* 2007; 133: 859-66.

33. Zhou B, Rao L, Li Y, *et al.* A functional insertion/deletion polymorphism in the promoter region of NFKB1 gene increases susceptibility for nasopharyngeal carcinoma. *Cancer Lett* 2009; 275: 72-6.

34. Zhou B, Qie M, Wang Y, *et al.* Relationship between NFKB1 -94 insertion/deletion ATTG



1  
2  
3 polymorphism and susceptibility of cervical squamous cell carcinoma risk. *Ann Oncol* 2010; 21:  
4 506-11.

5  
6 35. Lewander A, Butchi AK, Gao J, *et al.* Polymorphism in the promoter region of the NFKB1 gene  
7 increases the risk of sporadic colorectal cancer in Swedish but not in Chinese populations. *Scand J*  
8 *Gastroenterol* 2007; 42: 1332-8.

9  
10 36. Andersen V, Christensen J, Overvad K, *et al.* Polymorphisms in NFkB, PXR, LXR and risk of  
11 colorectal cancer in a prospective study of Danes. *Bmc Cancer* 2010; 10: 484.

12  
13 37. Song S, Chen D, Lu J, *et al.* NFkappaB1 and NFkappaBIA polymorphisms are associated with  
14 increased risk for sporadic colorectal cancer in a southern Chinese population. *PLoS One* 2011; 6:  
15 e21726.

16  
17 38. Edenberg HJ, Xuei X, Wetherill LF, *et al.* Association of NFKB1, which encodes a subunit of the  
18 transcription factor NF-kappaB, with alcohol dependence. *Hum Mol Genet* 2008; 17: 963-70.

19  
20 39. Lu L, Risch E, Deng Q, *et al.* An insulin-like growth factor-II intronic variant affects local DNA  
21 conformation and ovarian cancer survival. *Carcinogenesis* 2013;34:2024-30.

22  
23 40. Lu L, Katsaros D, Mayne ST, *et al.* Functional study of risk loci of stem cell-associated gene  
24 lin-28B and associations with disease survival outcomes in epithelial ovarian cancer. *Carcinogenesis*  
25 2012;33:2119-25.

26  
27 41. Le Beau MM, Ito C, Cogswell P, *et al.* Chromosomal localization of the genes encoding the  
28 p50/p105 subunits of NF-kappa B (NFKB2) and the I kappa B/MAD-3 (NFKBI) inhibitor of  
29 NF-kappa B to 4q24 and 14q13, respectively. *Genomics* 1992; 14: 529-31.

30  
31 42. Gao J, Pfeifer D, He LJ, *et al.* Association of NFKBIA polymorphism with colorectal cancer risk  
32 and prognosis in Swedish and Chinese populations. *Scand J Gastroenterol.* 2007; 42: 345-50.

33  
34 43. Yuan JM, Ross RK, Stanczyk FZ, *et al.* A cohort study of serum testosterone and hepatocellular  
35 carcinoma in Shanghai, China. *Int J Cancer* 1995; 63: 491-3.

1  
2  
3 **Genetic polymorphism of *NFKB1* and *NFKBIA* genes and liver cancer risk: a**  
4 **nested case-control study in Shanghai, China**  
5  
6

7  
8 Jing Gao<sup>1,2</sup>, Hong-Li Xu<sup>2</sup>, Shan Gao<sup>3</sup>, Wei Zhang<sup>2</sup>, Yu-Ting Tan<sup>2</sup>, Nat Rothman<sup>4</sup>,  
9 Mark Purdue<sup>4</sup>, Yu-Tang Gao<sup>2</sup>, Wei Zheng<sup>5</sup>, Xiao-Ou Shu<sup>5</sup>, Yong-Bing Xiang<sup>1,2</sup>  
10

11  
12 **Affiliations:**  
13

- 14 1. State Key Laboratory of Oncogene and Related Genes, Shanghai Cancer Institute,  
15 Renji Hospital, Shanghai Jiaotong University School of Medicine, Shanghai, China.  
16 2. Department of Epidemiology, Shanghai Cancer Institute, Renji Hospital, Shanghai  
17 Jiaotong University School of Medicine, Shanghai, China.  
18 3. Department of Infection Management, The First Affiliated Hospital of Zhengzhou  
19 University, Zhengzhou, China.  
20 4. Division of Cancer Epidemiology and Genetics, National Cancer Institute,  
21 Rockville, USA.  
22 5. Division of Epidemiology, Department of Medicine, Vanderbilt Epidemiology  
23 Center, Vanderbilt-Ingram Cancer Center, Vanderbilt University School of Medicine,  
24 Nashville, USA.  
25  
26  
27  
28

29 **Corresponding author**

30 Prof. Y. B. Xiang,  
31 Shanghai Cancer Institute  
32 Renji Hospital  
33 Shanghai Jiaotong University School of Medicine  
34 No. 25, Lane 2200, Xie Tu Road  
35 Shanghai 200032  
36 P. R. China  
37 Telephone: 86-21-64437002  
38 Fax: 86-21-64046550  
39 E-mail: ybxiang@shsci.org  
40  
41  
42  
43

44 **Key words:** genetic polymorphisms, *NFKB1*, *NFKBIA*, primary liver cancer,  
45 susceptibility  
46  
47

48 **Word count: 2911 (Text)**  
49

50 **Tables: 5**

51 **Figures: 0**

52 **Supplemental tables: 0**  
53  
54  
55  
56  
57  
58  
59  
60

## ABSTRACT

**Objectives:** Genetic variations of NF- $\kappa$ B signaling pathway were found to be associated with inflammatory diseases and several malignancies. However, little is known about NF- $\kappa$ B pathway gene polymorphisms and susceptibility of liver cancer. The aim of this study was to investigate whether genetic variants of *NFKB1* and *NFKBIA* were associated with risk of liver cancer in a Chinese population.

**Design:** The study was designed as a nested case-control study within two prospective cohorts (the Shanghai Women's Health Study, SWHS, 1996–2000 and the Shanghai Men's Health Study, SMHS, 2002–2006).

**Settings:** This population-based study was conducted in urban Shanghai, China.

**Participants:** A total of 217 incident liver cancer cases diagnosed through December 31, 2009 and 427 healthy controls matched by sex, age at baseline ( $\pm 2$  years) and date ( $\pm 30$  days) of sample collection were included in the study.

**Primary and secondary outcome measures:** Genetic polymorphisms of *NFKB1* and *NFKBIA* were determined by TaqMan SNP genotyping assay blindly. OR and its 95% CIs were estimated by unconditional logistic regression model to measure the association between selected SNPs and the risk of liver cancer.

**Results:** After adjusted for potential confounding factors, rs28362491 ins/del or del/del genotypes were associated with higher risk of liver cancer with an adjusted OR of 1.54(95%CI: 1.04-2.28). rs230496 AG and GG genotypes were also noted with higher risk of liver cancer with an adjusted OR of 1.53 (95%CI: 1.03-2.26). Haplotype analysis indicated that carriers of the *NFKB1* GA and AA (rs230525-rs230530) haplotypes had higher risk of liver cancer under additive model. No association was observed between *NFKBIA* variants and risk of live cancer.

**Conclusions:** Our results suggest that genetic variants of *NFKB1* influence liver cancer susceptibility in Chinese population, although replication in other studies is needed.

### Article summary-strengths and limitations of this study

- This study was the first population-based study to evaluate the polymorphic variants of NF- $\kappa$ B and risk of liver cancer.
- Only incident cases from two prospective cohorts were included in the study which ruled out the possibility of recall and selection bias.
- The limitations of the study include relatively small sample size, unmeasured HBV infection, HCV infection and aflatoxin exposure. However, we did take into

1  
2  
3 consideration of the participants' history of hepatitis and liver cirrhosis, and the  
4 presents of HCV infection and aflatoxin are very low in the study population.  
5  
6  
7

## 8 INTRODUCTION

9  
10 Liver cancer is a common disorder worldwide which ranks the 5th and 7th most  
11 common cancer among men and women. It was estimated that more than 80% liver  
12 cancers occur in developing countries and about 54% occur in China<sup>1</sup>. Among the  
13 main risk factors for liver cancer, chronic infections of hepatitis B virus (HBV) and  
14 hepatitis C virus (HCV) are the most important in humans, accounting for more than  
15 70% of liver cancer cases worldwide<sup>2-4</sup>. Liver cirrhosis, heavy alcohol consumption,  
16 exposure to aflatoxin, and diabetes also account for part of liver cancer occurrence<sup>2-4</sup>.  
17  
18  
19

20  
21 Chronic inflammation has been widely accepted to play an important role in  
22 hepatocarcinogenesis. Most of the known risk factors of liver cancer such as HBV,  
23 HCV infection and alcohol drinking can cause persistent inflammatory reaction of the  
24 liver and promote cancer development<sup>5, 6</sup>. However, the molecular and cellular  
25 mechanisms linking inflammation and liver cancer remain unclear. Recent findings  
26 have suggested that NF- $\kappa$ B may play a crucial role in bridging the actions of growth  
27 factors and chronic inflammation to hepatic oncogenesis<sup>7-10</sup>.  
28  
29  
30

31  
32 NF- $\kappa$ B, a collection of dimeric transcription factors, was originally identified as  
33 a nuclear factor bound to the enhancer of the immunoglobulin  $\kappa$ -light chain gene<sup>11</sup>  
34 specific to B cells and presents in all cell types<sup>12</sup>. It is a major transcription regulator  
35 of the immune response, cell adhesion, differentiation, proliferation, and apoptosis<sup>13</sup>.  
36 NF- $\kappa$ B dimers are formed by seven distinct proteins: NF- $\kappa$ B1 (p105 and p50),  
37 NF- $\kappa$ B2 (p100 and p52), RelA (p65), RelB and c-Rel, of which NF- $\kappa$ B p50/RelA is  
38 the most common dimer form<sup>9</sup>. In the resting cell, most NF- $\kappa$ B dimers are inactivated  
39 in the cytoplasm by binding to specific inhibitors-I $\kappa$ B family, of which I $\kappa$ B $\alpha$  is the  
40 most common one. In the classical activation pathway, I $\kappa$ B is phosphorylated and  
41 degraded by I $\kappa$ B kinase complex, and then NF- $\kappa$ B dimers are released and translocate  
42 to the nucleus where they coordinate the transcriptional activation of target genes<sup>14</sup>.  
43 Several genetic variations of NF- $\kappa$ B signaling pathway have been reported to be  
44 associated with cancer risks such as breast<sup>15</sup>, prostate<sup>16</sup>, stomach<sup>17</sup>, colorectum<sup>18</sup> and  
45 mouth<sup>19</sup>. However, little is known about role of genetic polymorphisms of NF- $\kappa$ B  
46 genes and susceptibility of liver cancer.  
47  
48  
49  
50  
51  
52  
53  
54  
55

56 In a population based case-control study nested in two prospective cohorts of the  
57  
58  
59  
60

1  
2  
3  
4  
5  
6  
7  
8  
9  
10  
11  
12  
13  
14  
15  
16  
17  
18  
19  
20  
21  
22  
23  
24  
25  
26  
27  
28  
29  
30  
31  
32  
33  
34  
35  
36  
37  
38  
39  
40  
41  
42  
43  
44  
45  
46  
47  
48  
49  
50  
51  
52  
53  
54  
55  
56  
57  
58  
59  
60

Shanghai Women's and Men's Health Studies, we investigated the relationships between genetic variants of *NFKB1* and *NFKBIA*, two key genes involved in classic signaling pathway of NF- $\kappa$ B, and the risk of liver cancer among Chinese men and women.

## MATERIAL AND METHODS

### Study population

Participants of this study came from the Shanghai Women's Health Study (SWHS) and Shanghai Men's Health Study (SMHS). The design and methods used in these two studies have been described in detail elsewhere<sup>20-23</sup>. Briefly, the SWHS enrolled 74,941 women aged 40-74 years between March 1, 1997 and May 31, 2000, with a response rate of 92.7%. SMHS enrolled 61,491 men aged 40-74 years without history of cancer at recruitment from April 1, 2002 to June 30, 2006, with a response rate of 74.1%. Both studies were approved by the relevant Institutional Review Boards for human research in China and the United States and a written informed consent was obtained from all participants.

In-person interview was conducted by trained interviewers using a structured questionnaire at baseline to obtain information on demographics, lifestyle, dietary habits, medical history and other characteristics. Anthropometric measurements, including current weight, height and circumferences of the waist and hips, were also measured. Of the eligible participants, 56,831 (75.8%) of the SWHS and 46,332 (75.3%) of the SMHS provided a 10-ml blood sample at baseline. The samples were drawn into an EDTA Vacutainer tube and then kept in a portable styrofoam box with ice packs (at approximately 0-4°C) and processed within 6 hours for long-term storage at -70°C. A bio-specimen collection form was completed for each participant at the time of sample procurement which included the date and time of collection, time of last meal, and date of last menstruation, intake of selected foods, smoking, as well as use of any medications over the previous 24 hours and during the previous week.

### Cohort follow-up and outcome ascertainment

Both cohorts were followed for occurrence of cancer and other chronic diseases by active in-person surveys conducted every 2-3 years as well as annual record linkage to the databases of the population-based Shanghai Cancer Registry, Shanghai Vital Statistics Registry, and Shanghai Resident Registry. For the SWHS, four rounds of in-person follow-ups were completed and the response rates for the first

1  
2  
3 (2000-2002), second (2002-2004), third (2004-2007), and fourth (2008-2011)  
4 follow-up surveys were 99.8%, 98.7%, 96.7%, and 92.0%, respectively. For the  
5 SMHS, two rounds of follow-up surveys have completed. The response rates for the  
6 first (2004-2008) and second (2008-2011) follow-up surveys were 97.6% and 93.6%,  
7 respectively. For cohort members who developed liver cancer during the follow-up,  
8 medical chart were reviewed by a panel of oncologists to verify the diagnosis. Liver  
9 cancer data through December 31, 2009 was used for the present study.

10  
11  
12  
13  
14  
15  
16  
17  
18  
19  
20  
21  
22  
23  
24  
25  
26  
27  
28  
29  
30  
31  
32  
33  
34  
35  
36  
37  
38  
39  
40  
41  
42  
43  
44  
45  
46  
47  
48  
49  
50  
51  
52  
53  
54  
55  
56  
57  
58  
59  
60

Included in this nested case-control study are 217 incident liver cancer cases and 427 matched controls who had donated blood sample. Liver cancer cases were defined as having an International Classification of Disease, Ninth Revision (ICD-9), codes of 155.0 (primary malignant neoplasms), 155.1(malignant neoplasms of the intrahepatic bile ducts), or 155.2 (unspecified malignant neoplasms of the liver)<sup>24</sup>. Two control subjects were randomly selected from the cohorts who donated a blood sample at baseline and matched to each case for sex, age at baseline ( $\pm 2$  years) and date ( $\pm 30$  days) of sample collection. All controls were free of any cancer at the time of cancer diagnosis for the corresponding case.

### Genotyping

Single-nucleotide polymorphisms (SNPs) were selected based on both TagSNP and their putative functional significance. Tagging SNPs were selected by searching the Han Chinese data from the Hapmap project<sup>25</sup>. The following criteria were used to identify tagging SNPs: (i) SNPs located in the genes or within the 5-kb flanking region, (ii) a minor allele frequency  $\geq 0.05$ , and (iii) other unselected single-nucleotide polymorphisms could be captured by one of the tagging SNPs with a linkage disequilibrium of  $r^2 \geq 0.90$ . A total of 8 SNPs were selected for genotyping which were rs28362491, rs230530, rs230525, rs230496 for *NFKBI* and rs3138053, rs3138055, rs2273650, rs696 for *NFKBIA* (table 1). Genomic DNA was extracted from buffycoat using Promega DNA Extraction Kit according to the manufacturer's instructions (Promega Corporation, Madison, WI, USA). Genotyping were performed by the TaqMan assay, using the ABI PRISM 7900HT Sequence Detection System (Applied Biosystems, Foster City, CA, USA), in 384-wellformat, with dual fluorescent reporter probes VIC and FAM.— rs28362491 was genotyped using custom-designed probes and primers. The primer sequences were: 5'-GCCTCCGTGCTGCCT-3'(forward primer), 3'-AGGGAAGCCCCCAGGAA-5'(reverse primer). The probe sequences were: 5'-TTCCCCGACCATTGG-3' (del).



5'-CCGACCATTGATTGG-3' (ins). Other SNPs were genotyped using pre-designed assays (Applied biosystems). The quality and potential misclassification of the genotyping results were assessed by evaluating 5% of duplicate DNA samples that were randomly selected from the whole samples. There replicates were 100% concordant. All serum samples were tested blindly and were identified only by a unique identification number blinded with case-control status.

Table 1. Descriptions of Genetic Polymorphisms of the *NFKB1* and *NFKBIA* genes under investigation

| Gene          | Assay ID   | Sequence                                                        | Location     |
|---------------|------------|-----------------------------------------------------------------|--------------|
| <i>NFKB1</i>  | rs28362491 | CTCCGTGCTGCCTGCGTTCCCCGACC[-/ATTG]ATTGGGCC<br>CGGCAGGCGCTTCCTGG | 5'-near gene |
|               | rs230530   | TTTTTAGCACCAAACATCTTAATTT[A/G]CATTCAAATAAA<br>TGAGAACCACCAT     | intron       |
|               | rs230525   | TACGGGAAAAGTGATTCTTGTTTAC[A/G]GAGCCCTCTTT<br>CACAGTTTCATGTT     | intron       |
|               | rs230496   | TGTCTGGATTGCTTGAGACAGCCC[A/G]GTTTGCCCCTG<br>ACCTAATTGTTTAT      | intron       |
| <i>NFKBIA</i> | rs3138053  | ATTCGTTTATGCTATCTGACCTACA[C/T]TGTGCTCCCGCA<br>GAAAAAGGATCGT     | 5'-near gene |
|               | rs3138055  | AATCAACGGGATGACAGAATGACAA[C/T]GGAGAGGTCT<br>CCAACCACAGGCCAA     | 3'-near gene |
|               | rs2273650  | AACAATACATTATGTACACCATTTA[C/T]AGGAGGGTAAC<br>ACAAACCTTGACAG     | 3'-UTR       |
|               | rs696      | CCTACCACAATAAGACGTTTTGGGC[C/T]AGGCAGTGTGC<br>AGTGTGGATATAAG     | 3'-UTR       |

### Statistical analysis

Subjects with both survey data and genotyping results were included in the final analysis. Means and percentages of selected characteristics for cases and controls were calculated. The distributions of selected characteristics were compared between cases and controls by either student's *t*-test (continuous variables) or  $\chi^2$  test (categorical variables). Odds ratio and its 95% confidence interval were estimated by unconditional logistic regression model to measure the association between selected SNPs and the risk of primary liver cancer. In the multivariable analysis, potential confounding factors were adjusted for, which include age (continuous variable); education level (four categories: elementary school or less, middle school, high school, and college or above); history of hepatitis (yes or no); family history of liver cancer (yes or no); and history of other chronic liver diseases or cirrhosis (yes or no). Statistical analyses were carried out using the SAS software package (version 9.2; SAS Institute, Cary, NC). Tests for trend were performed by entering categorical

1  
2  
3 variables as continuous variables in the regression model. All P values were calculated  
4 by two-sided tests and were considered statistically significant if P was less than 0.05.  
5  
6

7 Hardy–Weinberg equilibrium and Linkage disequilibrium were accessed with  
8 HaploView version 4.0<sup>26</sup>. Associations between haplotypes and the risk of liver cancer  
9 were evaluated with HAPSTAT version 3.0 using the most common haplotype as the  
10 referent category, assuming an additive model<sup>27</sup>.  
11  
12  
13  
14  
15  
16  
17  
18  
19  
20  
21  
22  
23  
24  
25  
26  
27  
28  
29  
30  
31  
32  
33  
34  
35  
36  
37  
38  
39  
40  
41  
42  
43  
44  
45  
46  
47  
48  
49  
50  
51  
52  
53  
54  
55  
56  
57  
58  
59  
60

For peer review only



## RESULTS

Selected baseline characteristics of study participants were presented in table 2. The average ages of cases and control were 59.61 and 59.47. Compared with controls, liver cancer cases were more likely to have a lower education level, a history of hepatitis, a family history of liver cancer in first degree relatives, and history of chronic liver diseases or cirrhosis. Besides, male liver cancer cases were more probably to have lower body mass index, and be a non-regular exerciser compared to controls, although the difference were at borderline significance. Whereas in women, cases were more likely to have a history of type 2 diabetes than controls. No differences were observed in family income, smoking, drinking habits, waist to hip ratio, and family history of other cancers between the two groups.

The associations of *NFKB1* SNPs with liver cancer risk were summarized in table 3. The genotypes of rs28362491, rs230530 and rs230525 showed no deviation from Hardy-Weinberg equilibrium in controls except for rs230496. After adjusted for potential confounding factors, rs28362191 ins/del or del/del genotypes were associated with higher risk of liver cancer with an OR of 1.54(95%CI: 1.04-2.28). rs230496 AG and GG genotypes were also noted with higher risk of liver cancer with an adjusted OR of 1.53 (95%CI: 1.03-2.26). Carriers of rs230525 AG or GG genotypes had about 30% percent increased risk of liver cancer, but the risk was not insignificant. No association was found between rs230530 and liver cancer risk.

Table 4 presents the distribution of *NFKB1A* SNPs in cases and controls. The genotypes of rs3138055, rs696 and rs2273650 showed no deviation from Hardy-Weinberg equilibrium in controls but for rs3138053. Generally, all the four SNPs showed no relationship with liver cancer.

We further analyzed the haplotypes of these SNPs with risk of liver cancer (table 5). For *NFKB1* gene, two SNPs (rs230525, rs230530) demonstrated strong linkage disequilibrium ( $D' = 1.0$ ,  $r^2 = 0.59$ ). Compared to men carrying rs230525-rs230530 AG haplotype, those with GA or AA haplotypes were at increased risk of liver cancer with ORs of 1.46(95%CI: 1.05-2.03) and 1.81(95%CI: 1.15-2.86) in significance, respectively. For *NFKB1A*, rs3138053 and rs2273650 were in linkage disequilibrium ( $D' = 0.97$ ,  $r^2 = 0.31$ ) but none of the haplotypes was significantly associated with liver cancer.

Table 2. Distribution of selected characteristics in the study cases and controls<sup>†</sup>

| Characteristics                              | All subjects  |                  |        | Male          |                  |        | Female       |                  |        |
|----------------------------------------------|---------------|------------------|--------|---------------|------------------|--------|--------------|------------------|--------|
|                                              | Cases (N=217) | Controls (N=427) | P      | Cases (N=131) | Controls (N=262) | P      | Cases (N=86) | Controls (N=165) | P      |
| Age at interview, Mean±SD,                   | 59.61±9.56    | 59.47±9.55       | 0.853  | 60.05±9.93    | 59.86±9.95       | 0.858  | 58.95±8.98   | 58.85±8.87       | 0.928  |
| Education level (%)                          |               |                  |        |               |                  |        |              |                  |        |
| Elementary school or less                    | 63(29.30)     | 115(27.00)       |        | 18(13.95)     | 35(13.41)        |        | 45(52.33)    | 80(48.48)        |        |
| Middle school                                | 69(32.09)     | 148(37.74)       |        | 54(41.86)     | 104(39.85)       |        | 15(17.44)    | 44(26.67)        |        |
| High school                                  | 62(28.84)     | 91(21.36)        |        | 41(31.78)     | 61(23.37)        |        | 21(24.42)    | 30(18.18)        |        |
| College or above                             | 21(9.77)      | 72(16.90)        | 0.031  | 16(12.40)     | 61(23.37)        | 0.053  | 5(5.81)      | 11(6.67)         | 0.341  |
| Family income (%) <sup>†</sup>               |               |                  |        |               |                  |        |              |                  |        |
| Low                                          | 50(23.04)     | 90(21.13)        |        | 17(12.98)     | 37(14.12)        |        | 33(38.37)    | 53(32.32)        |        |
| Medium                                       | 112(51.61)    | 208(48.83)       |        | 76(58.02)     | 130(49.62)       |        | 36(41.86)    | 78(47.56)        |        |
| High                                         | 55(25.35)     | 128(30.05)       | 0.454  | 38(29.01)     | 95(36.26)        | 0.271  | 17(19.77)    | 33(20.12)        | 0.606  |
| Ever smoked (%)                              | 93(42.86)     | 173(40.52)       | 0.569  | 90(68.70)     | 163(62.21)       | 0.206  | 3(3.49)      | 10(6.06)         | 0.384  |
| Ever drank alcohol (%)                       | 45(20.74)     | 98(22.95)        | 0.523  | 42(32.06)     | 97(37.02)        | 0.333  | 3(3.49)      | 1(0.61)          | 0.084  |
| Body mass index ,kg/m <sup>2</sup> , Mean±SD | 23.79±3.65    | 24.16±3.31       | 0.198  | 23.16±3.25    | 23.77±2.89       | 0.06   | 24.75±4.02   | 24.78±3.80       | 0.961  |
| WHR, Mean±SD                                 | 0.87±0.07     | 0.87±0.07        | 0.936  | 0.90±0.06     | 0.90±0.06        | 0.379  | 0.82±0.05    | 0.83±0.06        | 0.261  |
| Regular physical activity (%)                | 94(43.32)     | 207(48.48)       | 0.215  | 49(37.40)     | 124(47.33)       | 0.062  | 45(52.33)    | 83(50.30)        | 0.761  |
| physical activity, MET-hours/week            | 81.58±47.12   | 83.71±43.59      | 0.570  | 66.86±40.33   | 68.00±34.61      | 0.78   | 104.00±48.09 | 108.60±44.83     | 0.450  |
| History of hepatitis (%)                     | 74(34.10)     | 25(5.85)         | <0.001 | 57(43.51)     | 16(6.11)         | <0.001 | 17(19.77)    | 9(9.45)          | <0.001 |
| Family history of cancer (%)                 | 69(31.80)     | 116(27.17)       | 0.220  | 41(31.30)     | 70(26.72)        | 0.342  | 28(32.56)    | 46(27.88)        | 0.441  |
| Family history of liver cancer (%)           | 28(12.90)     | 18(4.22)         | <0.001 | 20(15.27)     | 10(3.82)         | <0.001 | 8(9.30)      | 8(4.85)          | 0.171  |
| History of type 2 diabetes (%)               | 25(11.52)     | 35(8.20)         | 0.171  | 14(10.69)     | 25(9.54)         | 0.72   | 11(12.79)    | 10(6.06)         | 0.068  |
| History of chronic liver disease or          | 35(16.13)     | 11(2.58)         | <0.001 | 26(19.85)     | 10(3.82)         | <0.001 | 9(10.47)     | 1(0.61)          | <0.001 |

\* Missing data was excluded from the analysis

<sup>†</sup> Family income level (low income for <5000 yuan/year in the SWHS and <12 000 yuan/year in the SMHS; medium income for 5000 to <10 000 yuan/year in the SWHS and 12 000 to <24 000 yuan/year in the SMHS; and high income for >10 000 yuan/year in the SWHS and >24 000 yuan/year in the SMHS)

Table 3. *NFKB1* genetic polymorphisms with the risk of primary liver cancer

| SNPs               | Cases | Controls | P for $\chi^2$ | OR*   | 95%CI     | OR <sup>†</sup> | 95%CI     | OR <sup>‡</sup> | 95%CI     |
|--------------------|-------|----------|----------------|-------|-----------|-----------------|-----------|-----------------|-----------|
| rs28362491         |       |          |                |       |           |                 |           |                 |           |
| ins/ins            | 68    | 171      |                | 1.00  | -         | 1.00            | -         | 1.00            | -         |
| ins/del            | 102   | 160      |                | 1.60  | 1.10-2.33 | 1.60            | 1.10-2.33 | 1.71            | 1.13-2.60 |
| del/del            | 40    | 79       | 0.047          | 1.27  | 0.79-2.05 | 1.27            | 0.79-2.04 | 1.21            | 0.71-2.05 |
| <i>P for trend</i> |       |          |                | 0.144 |           | 0.146           |           | 0.233           |           |
| ins/del or del/del | 142   | 239      | 0.023          | 1.50  | 1.05-2.12 | 1.49            | 1.05-2.12 | 1.54            | 1.04-2.28 |
| rs230496           |       |          |                |       |           |                 |           |                 |           |
| AA                 | 64    | 164      |                | 1.00  | -         | 1.00            | -         | 1.00            | -         |
| AG                 | 101   | 169      |                | 1.53  | 1.05-2.24 | 1.53            | 1.05-2.24 | 1.68            | 1.10-2.58 |
| GG                 | 47    | 91       | 0.087          | 1.33  | 0.84-2.09 | 1.32            | 0.84-2.09 | 1.25            | 0.75-2.09 |
| <i>P for trend</i> |       |          |                | 0.141 |           | 0.143           |           | 0.235           |           |
| AG or GG           | 148   | 260      | 0.041          | 1.46  | 1.03-2.08 | 1.46            | 1.03-2.08 | 1.53            | 1.03-2.26 |
| rs230525           |       |          |                |       |           |                 |           |                 |           |
| AA                 | 79    | 186      |                | 1.00  | -         | 1.00            | -         | 1.00            | -         |
| AG                 | 102   | 175      |                | 1.38  | 0.96-1.97 | 1.38            | 0.96-1.98 | 1.46            | 0.98-2.18 |
| GG                 | 32    | 63       | 0.224          | 1.20  | 0.73-1.98 | 1.20            | 0.73-1.97 | 1.11            | 0.63-1.94 |
| <i>P for trend</i> |       |          |                | 0.236 |           | 0.236           |           | 0.347           |           |
| AG or GG           | 134   | 238      | 0.100          | 1.33  | 0.95-1.87 | 1.33            | 0.95-1.87 | 1.36            | 0.94-1.99 |
| rs230530           |       |          |                |       |           |                 |           |                 |           |
| AA                 | 64    | 114      |                | 1.00  | -         | 1.00            | -         | 1.00            | -         |
| AG                 | 99    | 175      |                | 1.01  | 0.68-1.49 | 1.01            | 0.68-1.49 | 1.05            | 0.68-1.62 |
| GG                 | 48    | 129      | 0.102          | 0.66  | 0.42-1.04 | 0.66            | 0.42-1.04 | 0.67            | 0.40-1.12 |
| <i>P for trend</i> |       |          |                | 0.079 |           | 0.078           |           | 0.132           |           |
| AG or GG           | 147   | 304      | 0.423          | 0.86  | 0.60-1.24 | 0.86            | 0.60-1.24 | 0.89            | 0.59-1.34 |

\*Adjusted for age

<sup>†</sup>Adjusted for age, sex.<sup>‡</sup>Adjusted for age, sex, education level, family history of liver cancer, history of hepatitis, and chronic liver diseases or cirrhosis.

Table 4. *NFKB1A* genetic polymorphisms with the risk of primary liver cancer

| SNPs               | Cases | Controls | P     | OR*   | OR†       | OR‡                           |
|--------------------|-------|----------|-------|-------|-----------|-------------------------------|
| rs3138053          |       |          |       |       |           |                               |
| AA                 | 173   | 336      |       | 1.00  | -         | 1.00                          |
| AG                 | 21    | 48       |       | 0.85  | 0.49-1.47 | 0.84 0.48-1.45                |
| GG                 | 19    | 40       | 0.823 | 0.92  | 0.52-1.64 | 0.94 0.52-1.68                |
| <i>P for trend</i> |       |          |       | 0.638 |           | 0.653 0.920                   |
| AG or GG           | 40    | 88       | 0.556 | 0.88  | 0.58-1.34 | 0.88 0.58-1.34 0.97 0.61-1.54 |
| rs3138055          |       |          |       |       |           |                               |
| CC                 | 62    | 128      |       | 1.00  | -         | 1.00                          |
| CT                 | 109   | 215      |       | 1.05  | 0.72-1.54 | 1.05 0.72-1.54                |
| TT                 | 42    | 81       | 0.956 | 1.07  | 0.66-1.73 | 1.07 0.66-1.73                |
| <i>P for trend</i> |       |          |       | 0.772 |           | 0.771 0.276                   |
| CT or TT           | 151   | 296      | 0.778 | 1.06  | 0.74-1.51 | 1.06 0.74-1.52 1.25 0.83-1.88 |
| rs696              |       |          |       |       |           |                               |
| CC                 | 65    | 149      |       | 1.00  | -         | 1.00                          |
| CT                 | 115   | 196      |       | 1.35  | 0.93-1.96 | 1.35 0.93-1.96                |
| TT                 | 33    | 76       | 0.210 | 0.99  | 0.60-1.64 | 0.99 0.60-1.64                |
| <i>P for trend</i> |       |          |       | 0.694 |           | 0.695 0.360                   |
| CT or TT           | 148   | 272      | 0.218 | 1.25  | 0.88-1.78 | 1.25 0.88-1.78 1.38 0.93-2.06 |
| rs2273650          |       |          |       |       |           |                               |
| CC                 | 108   | 215      |       | 1.00  | -         | 1.00                          |
| CT                 | 84    | 173      |       | 0.97  | 0.68-1.37 | 0.97 0.68-1.37                |
| TT                 | 20    | 37       | 0.938 | 1.08  | 0.60-1.95 | 1.07 0.59-1.94                |
| <i>P for trend</i> |       |          |       | 0.937 |           | 0.945 0.493                   |
| CT or TT           | 104   | 210      | 0.933 | 0.99  | 0.71-1.38 | 0.99 0.71-1.37 0.86 0.60-1.24 |

\*Adjusted for age

† Adjusted for age, sex.

‡ Adjusted for age, sex, education level, family history of liver cancer, history of hepatitis, and chronic liver diseases or cirrhosis.

Table 5. ORs and 95% CIs for liver cancer in relation to *NFKB1/NFKB1A* haplotypes

|                                     | All subjects* |          |                 | Female† |          |                 | Male† |          |                 |
|-------------------------------------|---------------|----------|-----------------|---------|----------|-----------------|-------|----------|-----------------|
|                                     | Cases         | Controls | OR              | Cases   | Controls | OR              | Cases | Controls | OR              |
|                                     | (%)           | (%)      |                 | (%)     | (%)      |                 | (%)   |          |                 |
| <i>NFKB1</i> (rs230525-rs230530)    | n=215         | n=425    |                 | n=86    | n=165    |                 | n=129 | n=260    |                 |
| AG                                  | 46.49         | 52.01    | ref             | 52.14   | 49.39    | ref             | 42.69 | 53.53    | ref             |
| GA                                  | 38.973        | 35.50    | 1.23(0.95-1.58) | 36.47   | 36.59    | 0.94(0.63-1.41) | 40.55 | 34.88    | 1.46(1.05-2.03) |
| AA                                  | 14.54         | 12.49    | 1.30(0.91-1.86) | 11.39   | 14.02    | 0.77(0.42-1.39) | 16.76 | 11.59    | 1.81(1.15-2.86) |
| <i>NFKB1A</i> (rs3138055-rs2273650) |               |          |                 |         |          |                 |       |          |                 |
| TC                                  | 45.00         | 43.94    | ref             | 48.24   | 42.31    | ref             | 43.15 | 45.14    | ref             |
| CT                                  | 29.05         | 28.58    | 1.00(0.75-1.31) | 31.30   | 31.21    | 0.88(0.57-1.35) | 27.79 | 27.12    | 1.07(0.75-1.55) |
| CC                                  | 25.65         | 27.00    | 0.93(0.70-1.24) | 20.47   | 26.48    | 0.68(0.42-1.10) | 28.50 | 26.95    | 1.11(0.77-1.60) |

\* Adjusted for age and sex.

† Adjusted for age

## DISCUSSION

In this nested case-control study, we found that the variants of rs28362491 and rs230496 of *NFKB1* gene might be associated with risk of primary liver cancer. After adjusting for possible confounders, rs28362491 deletion allele and rs230496 AG or GG genotypes were found to increase the risk of liver cancer. In addition, haplotype analysis indicated that carriers of the *NFKB1* GA and AA (rs230525-rs230530) haplotypes had higher risk of liver cancer under additive model, although this association was only observed in man. These findings suggested that variants of NF- $\kappa$ B signaling pathway may play a role in liver cancer susceptibility.

*NFKB1* gene was mapped on chromosome 4q23-q24 and composed of 24 exons<sup>28</sup>. This gene encodes ~~for two proteins p105 and p50~~ p105 and p50 which is a none-DNA binding protein. As an inactive precursor, ~~and is it was~~ activated to p50, a DNA binding protein by proteasome-mediated degradation. Several genetic polymorphisms were defined in *NFKB1* and researches have been focused on a common polymorphism of -94 del/ins (rs28362491) in the promoter region. Recent studies showed that genetic polymorphism of rs28362491 was associated with a number of cancer risks including sporadic breast cancer<sup>15</sup>, prostate cancer<sup>16</sup>, gastric cancer<sup>17</sup>, colorectal cancer<sup>18</sup>, and oral cancer<sup>19</sup>, but little is known about its relationship with liver cancer. He and his colleagues conducted a case-control study of 202 HCC cases of HBV carrier and 404 healthy controls without HBV infection. Results showed that after adjusting for age and gender, -94 ins/del and ins/ins genotypes might increase the risk of HCC, with ORs of 1.60 (95%CI:1.01-2.53) and 3.01 (95%CI:1.87-4.85), respectively<sup>29</sup>. A report from Taiwan also found ins allele more prevalent in HCC patients (OR=2.23,95%CI:1.32-3.77)<sup>30</sup>. In our study, we found that ins/del and del/del genotypes were more prevalent in liver cancer cases than controls. It was observed that the association of rs28362491 polymorphism with cancer susceptibility varied with cancer site and study populations. Ins allele was reported to increase the risk of oral cancer<sup>31</sup>, melanoma<sup>32</sup>, prostate cancer<sup>16</sup>, gastric cancer<sup>17</sup>, nasopharyngeal carcinoma<sup>33</sup> and cervical cancer<sup>34</sup>. Two studies in European found del allele might increase the risk of colorectal cancer<sup>35, 36</sup>, while in Chinese population, none or even reverse association were obtained<sup>35, 37</sup>. The difference of polymorphisms may probably result from interactions or combined effects with none genetic risk factors. Well-designed studies with larger sample size are needed to validate these findings.

To our knowledge, this is the first report on the variants of rs230496, rs230525 and rs230530 with liver cancer susceptibility. A study in European American descent found

1  
2  
3  
4  
5  
6  
7  
8  
9  
10  
11  
12  
13  
14  
15  
16  
17  
18  
19  
20  
21  
22  
23  
24  
25  
26  
27  
28  
29  
30  
31  
32  
33  
34  
35  
36  
37  
38  
39  
40  
41  
42  
43  
44  
45  
46  
47  
48  
49  
50  
51  
52  
53  
54  
55  
56  
57  
58  
59  
60

rs230530 polymorphism associated with alcohol dependence, and the evidence came primarily from those individuals who met criteria for alcoholism earlier<sup>38</sup>. As alcohol is one of the major risk factors of liver cancer, rs230530 might play a role in alcohol associated liver cancer. Unfortunately, subject to the limitation of relatively small sample size, we were not able to explore this issue. In addition, although the functions of intronic SNPs are still obscure, studies have indicated that they can affect either local DNA or RNA secondary structure, thereby regulating gene expression<sup>39,40</sup>

*NFKB1A* gene, which encodes I $\kappa$ B $\alpha$ , the inhibitor of *NFKB1*, was mapped to 14q13 with six exons spanning approximately 3.5kb<sup>41</sup>. As a major component of I $\kappa$ B family, the dysfunction or down regulation of I $\kappa$ B $\alpha$  will lead to over activation of NF- $\kappa$ B. Epidemiological studies on *NFKB1A* were relatively rare. A 2758G/A polymorphism (rs696) in 3' untranslated region might regulate the expression of I $\kappa$ B $\alpha$  and thus affect the activation of NF- $\kappa$ B. Sun et al. found the frequency of AG genotype was increased in Chinese patients  $\geq 50$  years of age (OR=3.06, 95% CI:1.55-6.02) with colorectal cancer<sup>42</sup>. Another study on breast cancer failed to obtain a significant association<sup>15</sup>. There was no previous report on rs696 and risk of liver cancer.

Of the four SNPs of *NFKB1A* gene evaluated, we did not observe a significant association. In previous studies, rs3138053 variant was found to be associated with hepatocellular carcinoma in a Chinese mainland population<sup>29</sup> but not Taiwanese<sup>30</sup>.

There are several strengths of our study. This study was based on two well-designed prospective cohort studies. To the best of our knowledge, it was the first population based study to evaluate the polymorphic variants of NF- $\kappa$ B and risk of liver cancer. All study participants were ethnic Chinese and residents of Shanghai with similar genetic background, which minimized the potential confounding of ethnics. Only incident cases were included which ruled out the possibility of recall and selection bias. Liver cancer cases were carefully verified with multiple approaches which minimized the disease misclassification. Also, we controlled potential confounding variables in the analysis. The limitations of our study should also be noted. Firstly, we focused on only two genes involved in canonical pathway of NF- $\kappa$ B, other regulatory genes in NF- $\kappa$ B signaling pathway may also contribute to the pathogenesis of liver cancer. Secondly, we did not test for HBV infection, HCV infection or aflatoxin exposure, so we cannot rule out the possible confoundings although the presence of HCV infection and aflatoxin are very low in the study population<sup>43</sup>, but we did take into consideration of the participants' history of hepatitis and liver cirrhosis. Finally, due to

1  
2  
3 the relatively small sample size, the frequencies of some homozygous variants were low  
4 in subgroups therefore reduced the statistical power and limited us from evaluating the  
5 joint effects in stratified analysis. Replication in other studies is needed.  
6  
7

8 In summary, in this nested case-control study, we provided additional evidence for  
9 a role of NF- $\kappa$ B SNPs and haplotypes in the etiology of liver cancer. Studies in larger,  
10 varied populations are warranted to confirm these findings. Furthermore, functional  
11 studies are required in order to explore the underlying mechanisms.  
12  
13

14  
15  
16 **Acknowledgements** We would like to thank the participants of the Shanghai Men's  
17 Health Study and the Shanghai Women's Health Study for the invaluable contribution to  
18 this work.  
19  
20

21  
22  
23 **Contributors** YBX obtained the funding, developed the research design, drafted the  
24 manuscript, interpreted the results, and also had primary responsibility for the final  
25 content; W Zheng and XOS designed, directed and obtained funding for the parent  
26 cohorts, and contributed to the revisions and interpretation of the results; JG obtained  
27 part of funding, drafted the manuscript, analyzed the data and interpreted the results; JG  
28 and HLX conducted experiments; All authors critically reviewed and approval  
29 manuscript.  
30  
31  
32  
33

34  
35  
36 **Funding** This work was supported by the funds of State Key Project Specialized for  
37 Infectious Diseases of China [No.2008ZX10002-015, No.2012ZX10002008-002 to YB  
38 Xiang]. Part of JG's effort on the study has been supported by research project of  
39 Shanghai Municipal Health Bureau [No.2008208]. The parent cohorts were supported  
40 by the grants (R37 CA070867 to W Zheng and R01 CA82729 to XO Shu) from the US  
41 National Institutes of Health.  
42  
43  
44

45  
46  
47 **Competing interests** None. The funding sponsor had no role in the study design, data  
48 collection, statistical analysis and result interpretation, as well as in the writing of the  
49 report and the decision to submit for publication. The corresponding author had full  
50 access to all data in the study and final responsibility for the decision to submit for  
51 publication.  
52  
53  
54  
55

56  
57  
58 **Study approval** Institutional review board.  
59  
60



**Ethics approval** Vanderbilt University IRB and Shanghai Cancer Institute IRB.

**Provenance and peer review** Not commissioned; externally peer reviewed.

**Data sharing statement** No additional data are available.

## References:

1. Ferlay J, Shin HR, Bray F, *et al*. GLOBOCAN 2008 v2.0, Cancer Incidence and Mortality Worldwide: IARC CancerBase No. 10 [Internet]. Lyon, France: International Agency for Research on Cancer, 2010. Cited 28 Sep 2013. Available from URL: <http://globocan.iarc.fr>.
2. Gao J, Xie L, Yang WS, *et al*. Risk factors of hepatocellular carcinoma-current status and perspectives. *Asian Pac J Cancer Prev* 2012; 13: 743-52.
3. Schottenfeld D, Fraumeni JF. Cancer epidemiology and prevention. 3rd ed. Oxford: Oxford University Press, 2006.
4. Boyle P, Levin B. World cancer report 2008. Lyon: International Agency for Research on Cancer, 2008.
5. Seitz HK, Stickel F. Molecular mechanisms of alcohol-mediated carcinogenesis. *Nat Rev Cancer* 2007; 7: 599-612.
6. Coussens LM, Werb Z. Inflammation and cancer. *Nature* 2002; 420: 860-7.
7. Arsur M, Cavin LG. Nuclear factor-kappaB and liver carcinogenesis. *Cancer Lett* 2005; 229: 157-69.
8. Pikarsky E, Porat RM, Stein I, *et al*. NF-kappaB functions as a tumour promoter in inflammation-associated cancer. *Nature* 2004; 431: 461-6.
9. He G, Karin M. NF-kappaB and STAT3 - key players in liver inflammation and cancer. *Cell Res* 2011; 21: 159-68.
10. Berasain C, Castillo J, Perugorria MJ, *et al*. Inflammation and liver cancer: new molecular links. *Ann NY Acad Sci* 2009; 1155: 206-21.
11. Sen R, Baltimore D. Multiple nuclear factors interact with the immunoglobulin enhancer sequences. *Cell* 1986; 46: 705-16.
12. Barnes PJ, Karin M. Nuclear factor-kappaB: a pivotal transcription factor in chronic inflammatory diseases. *N Engl J Med* 1997; 336: 1066-71.
13. Baldwin AJ. Series introduction: the transcription factor NF-kappaB and human disease. *J Clin Invest* 2001; 107: 3-6.
14. Karin M. Nuclear factor-kappaB in cancer development and progression. *Nature* 2006; 441: 431-6.
15. Curran JE, Weinstein SR, Griffiths LR. Polymorphic variants of NFKB1 and its inhibitory protein NFKBIA, and their involvement in sporadic breast cancer. *Cancer Lett* 2002; 188: 103-7.
16. Zhang P, Wei Q, Li X, *et al*. A functional insertion/deletion polymorphism in the promoter region of the NFKB1 gene increases susceptibility for prostate cancer. *Cancer Genet Cytogenet* 2009; 191:

73-7.

17. Lo SS, Chen JH, Wu CW, *et al.* Functional polymorphism of NFKB1 promoter may correlate to the susceptibility of gastric cancer in aged patients. *Surgery* 2009; 145: 280-5.

18. Yu Y, Liu H, Jin M, *et al.* The joint association of REST and NFKB1 polymorphisms on the risk of colorectal cancer. *Ann Hum Genet* 2012; 76: 269-76.

19. Lin CW, Hsieh YS, Hsin CH, *et al.* Effects of NFKB1 and NFKBIA gene polymorphisms on susceptibility to environmental factors and the clinicopathologic development of oral cancer. *PLoS One* 2012; 7: e35078.

20. Shu XO, Yang G, Jin F, *et al.* Validity and reproducibility of the food frequency questionnaire used in the Shanghai Women's Health Study. *Eur J Clin Nutr* 2004; 58: 17-23.

21. Zheng W, Chow WH, Yang G, *et al.* The Shanghai Women's Health Study: rationale, study design, and baseline characteristics. *Am J Epidemiol* 2005; 162: 1123-31.

22. Villegas R, Yang G, Liu D, *et al.* Validity and reproducibility of the food-frequency questionnaire used in the Shanghai men's health study. *Br J Nutr* 2007; 97: 993-1000.

23. Cai H, Zheng W, Xiang YB, *et al.* Dietary patterns and their correlates among middle-aged and elderly Chinese men: a report from the Shanghai Men's Health Study. *Br J Nutr* 2007; 98: 1006-13.

24. World Health Organization. International Classification of Diseases, ninth revision (ICD-9). Geneva, Switzerland: World Health Organization, 1977.

25. de Bakker PI, McVean G, Sabeti PC, *et al.* A high-resolution HLA and SNP haplotype map for disease association studies in the extended human MHC. *Nat Genet* 2006; 38: 1166-72.

26. Barrett JC, Fry B, Maller J, *et al.* Haploview: analysis and visualization of LD and haplotype maps. *Bioinformatics* 2005; 21: 263-5.

27. Lin DY, Zeng D, Millikan R. Maximum likelihood estimation of haplotype effects and haplotype-environment interactions in association studies. *Genet Epidemiol* 2005; 29: 299-312.

28. Mathew S, Murty VV, Dalla-Favera R, *et al.* Chromosomal localization of genes encoding the transcription factors, c-rel, NF-kappa Bp50, NF-kappa Bp65, and Iy-10 by fluorescence in situ hybridization. *Oncogene* 1993; 8: 191-3.

29. He Y, Zhang H, Yin J, *et al.* IkappaBalpha gene promoter polymorphisms are associated with hepatocarcinogenesis in patients infected with hepatitis B virus genotype C. *Carcinogenesis* 2009; 30: 1916-22.

30. Cheng CW, Su JL, Lin CW, *et al.* Effects of NFKB1 and NFKBIA gene polymorphisms on hepatocellular carcinoma susceptibility and clinicopathological features. *PLoS One* 2013; 8: e56130.

31. Lin SC, Liu CJ, Yeh WI, *et al.* Functional polymorphism in NFKB1 promoter is related to the risks of oral squamous cell carcinoma occurring on older male areca (betel) chewers. *Cancer Lett* 2006; 243: 47-54.

32. Bu H, Rosdahl I, Sun XF, *et al.* Importance of polymorphisms in NF-kappaB1 and NF-kappaB1alpha genes for melanoma risk, clinicopathological features and tumor progression in Swedish melanoma patients. *J Cancer Res Clin Oncol* 2007; 133: 859-66.

33. Zhou B, Rao L, Li Y, *et al.* A functional insertion/deletion polymorphism in the promoter region of NFKB1 gene increases susceptibility for nasopharyngeal carcinoma. *Cancer Lett* 2009; 275: 72-6.

34. Zhou B, Qie M, Wang Y, *et al.* Relationship between NFKB1 -94 insertion/deletion ATTG

1  
2  
3 polymorphism and susceptibility of cervical squamous cell carcinoma risk. *Ann Oncol* 2010; 21:  
4 506-11.

5  
6 35. Lewander A, Butchi AK, Gao J, *et al.* Polymorphism in the promoter region of the NFKB1 gene  
7 increases the risk of sporadic colorectal cancer in Swedish but not in Chinese populations. *Scand J*  
8 *Gastroenterol* 2007; 42: 1332-8.

9  
10 36. Andersen V, Christensen J, Overvad K, *et al.* Polymorphisms in NFkB, PXR, LXR and risk of  
11 colorectal cancer in a prospective study of Danes. *Bmc Cancer* 2010; 10: 484.

12  
13 37. Song S, Chen D, Lu J, *et al.* NFkappaB1 and NFkappaBIA polymorphisms are associated with  
14 increased risk for sporadic colorectal cancer in a southern Chinese population. *PLoS One* 2011; 6:  
15 e21726.

16  
17 38. Edenberg HJ, Xuei X, Wetherill LF, *et al.* Association of NFKB1, which encodes a subunit of the  
18 transcription factor NF-kappaB, with alcohol dependence. *Hum Mol Genet* 2008; 17: 963-70.

19  
20 39. Lu L, Risch E, Deng Q, *et al.* An insulin-like growth factor-II intronic variant affects local DNA  
21 conformation and ovarian cancer survival. *Carcinogenesis* 2013;34:2024-30.

22  
23 40. Lu L, Katsaros D, Mayne ST, *et al.* Functional study of risk loci of stem cell-associated gene  
24 lin-28B and associations with disease survival outcomes in epithelial ovarian cancer. *Carcinogenesis*  
25 2012;33:2119-25.

26  
27 41. Le Beau MM, Ito C, Cogswell P, *et al.* Chromosomal localization of the genes encoding the  
28 p50/p105 subunits of NF-kappa B (NFKB2) and the I kappa B/MAD-3 (NFKBI) inhibitor of  
29 NF-kappa B to 4q24 and 14q13, respectively. *Genomics* 1992; 14: 529-31.

30  
31 42. Gao J, Pfeifer D, He LJ, *et al.* Association of NFKBIA polymorphism with colorectal cancer risk  
32 and prognosis in Swedish and Chinese populations. *Scand J Gastroenterol.* 2007; 42: 345-50.

33  
34 43. Yuan JM, Ross RK, Stanczyk FZ, *et al.* A cohort study of serum testosterone and hepatocellular  
35 carcinoma in Shanghai, China. *Int J Cancer* 1995; 63: 491-3.

STROBE Statement—Checklist of items that should be included in reports of *cohort studies*

|                              | Item No | Recommendation                                                                                                                                                                                    | Reported on page # |
|------------------------------|---------|---------------------------------------------------------------------------------------------------------------------------------------------------------------------------------------------------|--------------------|
| Title and abstract           | 1       | (a) Indicate the study's design with a commonly used term in the title or the abstract                                                                                                            | 1-3                |
|                              |         | (b) Provide in the abstract an informative and balanced summary of what was done and what was found                                                                                               | 2, 3               |
| <b>Introduction</b>          |         |                                                                                                                                                                                                   |                    |
| Background/rationale         | 2       | Explain the scientific background and rationale for the investigation being reported                                                                                                              | 3                  |
| Objectives                   | 3       | State specific objectives, including any prespecified hypotheses                                                                                                                                  | 4                  |
| <b>Methods</b>               |         |                                                                                                                                                                                                   |                    |
| Study design                 | 4       | Present key elements of study design early in the paper                                                                                                                                           | 4, 5               |
| Setting                      | 5       | Describe the setting, locations, and relevant dates, including periods of recruitment, exposure, follow-up, and data collection                                                                   | 4, 5               |
| Participants                 | 6       | (a) Give the eligibility criteria, and the sources and methods of selection of participants. Describe methods of follow-up                                                                        | 4, 5               |
|                              |         | (b) For matched studies, give matching criteria and number of exposed and unexposed                                                                                                               | 5                  |
| Variables                    | 7       | Clearly define all outcomes, exposures, predictors, potential confounders, and effect modifiers. Give diagnostic criteria, if applicable                                                          | 4-6                |
| Data sources/<br>measurement | 8*      | For each variable of interest, give sources of data and details of methods of assessment (measurement). Describe comparability of assessment methods if there is more than one group              | 4-6                |
| Bias                         | 9       | Describe any efforts to address potential sources of bias                                                                                                                                         | 4-6                |
| Study size                   | 10      | Explain how the study size was arrived at                                                                                                                                                         | 5                  |
| Quantitative variables       | 11      | Explain how quantitative variables were handled in the analyses. If applicable, describe which groupings were chosen and why                                                                      | 6                  |
| Statistical methods          | 12      | (a) Describe all statistical methods, including those used to control for confounding                                                                                                             | 6                  |
|                              |         | (b) Describe any methods used to examine subgroups and interactions                                                                                                                               | N/A                |
|                              |         | (c) Explain how missing data were addressed                                                                                                                                                       | 9                  |
|                              |         | (d) If applicable, explain how loss to follow-up was addressed                                                                                                                                    | 4-5                |
|                              |         | (e) Describe any sensitivity analyses                                                                                                                                                             | N/A                |
| <b>Results</b>               |         |                                                                                                                                                                                                   |                    |
| Participants                 | 13*     | (a) Report numbers of individuals at each stage of study—eg numbers potentially eligible, examined for eligibility, confirmed eligible, included in the study, completing follow-up, and analysed | 5, 9               |
|                              |         | (b) Give reasons for non-participation at each stage                                                                                                                                              | 4-5                |
|                              |         | (c) Consider use of a flow diagram                                                                                                                                                                | N/A                |
| Descriptive data             | 14*     | (a) Give characteristics of study participants (eg demographic, clinical, social) and information on exposures and potential confounders                                                          | 8, 9               |
|                              |         | (b) Indicate number of participants with missing data for each variable of interest                                                                                                               | 9-12               |
|                              |         | (c) Summarise follow-up time (eg, average and total amount)                                                                                                                                       | 4-5                |
| Outcome data                 | 15*     | Report numbers of outcome events or summary measures over time                                                                                                                                    | 5                  |

|                                                                                                                                                          |                          |    |                                                                                                                                                                                                              |           |
|----------------------------------------------------------------------------------------------------------------------------------------------------------|--------------------------|----|--------------------------------------------------------------------------------------------------------------------------------------------------------------------------------------------------------------|-----------|
| 1<br>2<br>3<br>4<br>5<br>6<br>7<br>8<br>9<br>10                                                                                                          | Main results             | 16 | (a) Give unadjusted estimates and, if applicable, confounder-adjusted estimates and their precision (eg, 95% confidence interval). Make clear which confounders were adjusted for and why they were included | 6,7, 9-12 |
| 11<br>12<br>13                                                                                                                                           |                          |    | (b) Report category boundaries when continuous variables were categorized                                                                                                                                    | 9         |
| 14<br>15<br>16<br>17<br>18<br>19                                                                                                                         |                          |    | (c) If relevant, consider translating estimates of relative risk into absolute risk for a meaningful time period                                                                                             | N/A       |
| 20<br>21<br>22<br>23<br>24                                                                                                                               | Other analyses           | 17 | Report other analyses done—eg analyses of subgroups and interactions, and sensitivity analyses                                                                                                               | 12        |
| 25                                                                                                                                                       | <b>Discussion</b>        |    |                                                                                                                                                                                                              |           |
| 26<br>27<br>28<br>29                                                                                                                                     | Key results              | 18 | Summarise key results with reference to study objectives                                                                                                                                                     | 13-15     |
| 30<br>31<br>32<br>33<br>34                                                                                                                               | Limitations              | 19 | Discuss limitations of the study, taking into account sources of potential bias or imprecision. Discuss both direction and magnitude of any potential bias                                                   | 14-15     |
| 35<br>36<br>37<br>38<br>39<br>40<br>41<br>42<br>43<br>44<br>45<br>46<br>47<br>48<br>49<br>50<br>51<br>52<br>53<br>54<br>55<br>56<br>57<br>58<br>59<br>60 | Interpretation           | 20 | Give a cautious overall interpretation of results considering objectives, limitations, multiplicity of analyses, results from similar studies, and other relevant evidence                                   | 15        |
|                                                                                                                                                          | Generalisability         | 21 | Discuss the generalisability (external validity) of the study results                                                                                                                                        | 13, 14    |
|                                                                                                                                                          | <b>Other information</b> |    |                                                                                                                                                                                                              |           |
|                                                                                                                                                          | Funding                  | 22 | Give the source of funding and the role of the funders for the present study and, if applicable, for the original study on which the present article is based                                                | 15        |

\*Give information separately for cases and controls in case-control studies and, if applicable, for exposed and unexposed groups in cohort and cross-sectional studies.

**Note:** An Explanation and Elaboration article discusses each checklist item and gives methodological background and published examples of transparent reporting. The STROBE checklist is best used in conjunction with this article (freely available on the Web sites of PLoS Medicine at <http://www.plosmedicine.org/>, Annals of Internal Medicine at <http://www.annals.org/>, and Epidemiology at <http://www.epidem.com/>). Information on the STROBE Initiative is available at [www.strobe-statement.org](http://www.strobe-statement.org).
